# Supplementary material for: Alterations in Gut Microbiota Composition in Patients with COVID-19: A Pilot Study of Whole Hypervariable 16S rRNA Gene Sequencing
Source: MDPI journal article supplement (doi:10.3390/biomedicines11020367), 2023-01-27
Supplement: s1 [file s1]

## Supplementary Materials

# Alterations in Gut Microbiota Composition in Patients with COVID-19: A Pilot Study of Whole Hypervariable 16S rRNA Gene Sequencing

Dorota Mańkowska-Wierzbicka, Joanna Zuraszek, Adrianna Wierzbicka, Marcin Gabryel, Dagmara Mahadea, Alina Baturo, Oliwia Zakerska-Banaszak, Ryszard Slomski, Marzena Skrzypczak-Zielinska and Agnieszka Dobrowolska

**Table S1.** The percentage abundance of the intestinal microbiota in the study group of COVID-19 patients and healthy controls at the phylum level.

| Phylum                 | COVID-19 patients, <i>n</i> = 8 |          |          |          |          | Controls, <i>n</i> = 14 |          |          |          |          | <i>p</i> -value | <i>p</i> -adj. |
|------------------------|---------------------------------|----------|----------|----------|----------|-------------------------|----------|----------|----------|----------|-----------------|----------------|
|                        | Mean                            | Median   | SD       | Min.     | Max.     | Mean                    | Median   | SD       | Min.     | Max.     |                 |                |
| <i>Verrucomicrobia</i> | 0.7378                          | 0.1971   | 10.3796  | 0.0496   | 40.1029  | 0.0241                  | 0.0160   | 0.0290   | 0.0000   | 0.0923   | <b>0.0004</b>   | <b>0.0028</b>  |
| {Unknown Phylum}       | 0.0024                          | 0.0000   | 0.0055   | 0.0000   | 0.0157   | 0.0000                  | 0.0000   | 0.0000   | 0.0000   | 0.0000   | 0.0993          | 0.2754         |
| <i>Bacteria</i>        | 0.0006                          | 0.0000   | 0.0017   | 0.0000   | 0.0049   | 0.0000                  | 0.0000   | 0.0000   | 0.0000   | 0.0000   | 0.1354          | 0.6189         |
| <i>Deferribacteres</i> | 0.0000                          | 0.0000   | 0.0000   | 0.0000   | 0.0000   | 0.0021                  | 0.0000   | 0.0067   | 0.0000   | 0.0251   | 0.2461          | 0.6189         |
| <i>Euryarchaeota</i>   | 60.7832                         | 0.8648   | 160.0545 | 0.0883   | 460.4070 | 70.0678                 | 10.5173  | 130.7392 | 0.0154   | 520.4754 | 0.2573          | 0.6189         |
| <i>Proteobacteria</i>  | 270.3214                        | 30.2859  | 150.1309 | 60.7571  | 440.7306 | 330.7927                | 30.8585  | 190.3539 | 0.8767   | 580.7455 | 0.2719          | 0.6189         |
| <i>Bacteroidetes</i>   | 630.7174                        | 630.6255 | 140.6559 | 450.4394 | 840.0068 | 560.7847                | 530.7607 | 220.4752 | 170.6835 | 920.7791 | 0.2944          | 0.6189         |
| <i>Firmicutes</i>      | 10.3297                         | 0.9977   | 10.4225  | 0.0716   | 40.3535  | 20.2085                 | 10.5965  | 20.0419  | 0.1847   | 60.3288  | 0.4469          | 0.6189         |
| <i>Actinobacteria</i>  | 0.0000                          | 0.0000   | 0.0000   | 0.0000   | 0.0000   | 0.0050                  | 0.0000   | 0.0186   | 0.0000   | 0.0697   | 0.4469          | 0.6189         |
| <i>Chloroflexi</i>     | 0.0000                          | 0.0000   | 0.0000   | 0.0000   | 0.0000   | 0.0005                  | 0.0000   | 0.0020   | 0.0000   | 0.0076   | 0.4469          | 0.6189         |
| <i>Nitrospirae</i>     | 0.0000                          | 0.0000   | 0.0000   | 0.0000   | 0.0000   | 0.0003                  | 0.0000   | 0.0011   | 0.0000   | 0.0043   | 0.6253          | 0.6189         |
| <i>SHA-109</i>         | 0.0633                          | 0.0000   | 0.1357   | 0.0000   | 0.3812   | 0.0142                  | 0.0000   | 0.0458   | 0.0000   | 0.1711   | 0.6605          | 0.6189         |
| <i>Cyanobacteria</i>   | 0.0121                          | 0.0000   | 0.0328   | 0.0000   | 0.0931   | 0.0019                  | 0.0000   | 0.0050   | 0.0000   | 0.0153   | 0.6849          | 0.6539         |
| <i>Lentisphaerae</i>   | 0.0007                          | 0.0000   | 0.0013   | 0.0000   | 0.0032   | 0.0014                  | 0.0000   | 0.0038   | 0.0000   | 0.0125   | 0.7523          | 0.7678         |
| <i>Fusobacteria</i>    | 0.0324                          | 0.0000   | 0.0598   | 0.0000   | 0.1516   | 0.0968                  | 0.0000   | 0.1891   | 0.0000   | 0.4700   | 0.8924          | 0.8742         |
| <i>Tenericutes</i>     | 0.0000                          | 0.0000   | 0.0000   | 0.0000   | 0.0000   | 0.0000                  | 0.0000   | 0.0000   | 0.0000   | 0.0000   | NA              | NA             |
| <i>Spirochaetae</i>    | 0.0000                          | 0.0000   | 0.0000   | 0.0000   | 0.0000   | 0.0000                  | 0.0000   | 0.0000   | 0.0000   | 0.0000   | NA              | NA             |
| <i>Synergistetes</i>   | 0.0000                          | 0.0000   | 0.0000   | 0.0000   | 0.0000   | 0.0000                  | 0.0000   | 0.0000   | 0.0000   | 0.0000   | NA              | NA             |

*SD*—standard deviation; *NA*—not available; *p*-value—calculated with the non-parametric Mann–Whitney test; *p*-adj.—*p* values adjusted with Benjamini–Hochberg false-discovery rate (FDR) for multiple comparisons; red font—statistically significant results (*p* < 0.05).

**Table S2.** The percentage abundance of the intestinal microbiota in the study group of COVID-19 patients and healthy controls at the class level.

| Class                        | COVID-19 patients, <i>n</i> = 8 |          |          |         |          | Controls, <i>n</i> = 14 |          |          |          |          | <i>p</i> -value | <i>p</i> -adj. |
|------------------------------|---------------------------------|----------|----------|---------|----------|-------------------------|----------|----------|----------|----------|-----------------|----------------|
|                              | Mean                            | Median   | SD       | Min.    | Max.     | Mean                    | Median   | SD       | Min.     | Max.     |                 |                |
| <i>Verrucomicrobiae</i>      | 0.7316                          | 0.1971   | 10.3831  | 0.0251  | 40.1029  | 0.0238                  | 0.0160   | 0.0286   | 0.0000   | 0.0923   | <b>0.0017</b>   | <b>0.0126</b>  |
| {Unknown Phylum}             |                                 |          |          |         |          |                         |          |          |          |          |                 |                |
| <i>Bacteria</i>              | 0.0014                          | 0.0000   | 0.0029   | 0.0000  | 0.0078   | 0.0000                  | 0.0000   | 0.0000   | 0.0000   | 0.0000   | 0.0648          | 0.3997         |
| <i>Cytophagia</i>            | 0.1470                          | 0.1841   | 0.0932   | 0.0143  | 0.2621   | 0.0888                  | 0.0314   | 0.1356   | 0.0000   | 0.3998   | 0.1083          | 0.5409         |
| <i>Erysipelotrichia</i>      | 10.1282                         | 10.1296  | 0.3805   | 0.2911  | 10.4662  | 10.7849                 | 0.5518   | 20.8593  | 0.0978   | 90.8891  | 0.1423          | 0.5409         |
| <i>VC20.1 Bac22</i>          | 0.3792                          | 0.2049   | 0.4976   | 0.0107  | 10.5312  | 0.1956                  | 0.0473   | 0.2737   | 0.0000   | 0.8772   | 0.1820          | 0.5409         |
| <i>Deltaproteobacteria</i>   | 0.0271                          | 0.0211   | 0.0284   | 0.0000  | 0.0838   | 0.0194                  | 0.0019   | 0.0384   | 0.0000   | 0.1412   | 0.1840          | 0.5409         |
| <i>Epsilonproteobacteria</i> | 0.0000                          | 0.0000   | 0.0000   | 0.0000  | 0.0000   | 0.2294                  | 0.0000   | 0.8275   | 0.0000   | 30.1036  | 0.1885          | 0.5409         |
| <i>Negativicutes</i>         | 0.3318                          | 0.3440   | 0.1640   | 0.0081  | 0.5639   | 0.2598                  | 0.1076   | 0.3600   | 0.0000   | 0.9634   | 0.2066          | 0.5409         |
| <i>Deferribacteres</i>       | 0.0006                          | 0.0000   | 0.0017   | 0.0000  | 0.0049   | 0.0000                  | 0.0000   | 0.0000   | 0.0000   | 0.0000   | 0.2193          | 0.5409         |
| <i>Flavobacteriia</i>        | 0.0004                          | 0.0000   | 0.0012   | 0.0000  | 0.0035   | 0.0000                  | 0.0000   | 0.0000   | 0.0000   | 0.0000   | 0.2193          | 0.5409         |
| {Unknown Class}              |                                 |          |          |         |          |                         |          |          |          |          |                 |                |
| <i>Bacteroidetes</i>         | 0.0014                          | 0.0000   | 0.0039   | 0.0000  | 0.0111   | 0.0000                  | 0.0000   | 0.0000   | 0.0000   | 0.0000   | 0.2193          | 0.5409         |
| <i>BD2-02</i>                | 0.0000                          | 0.0000   | 0.0000   | 0.0000  | 0.0000   | 0.0006                  | 0.0000   | 0.0014   | 0.0000   | 0.0040   | 0.3050          | 0.6373         |
| <i>Bacilli</i>               | 0.6528                          | 0.1830   | 10.4033  | 0.0175  | 40.1103  | 0.3046                  | 0.0662   | 0.6797   | 0.0077   | 20.5801  | 0.3223          | 0.6373         |
| {Unknown Class}              |                                 |          |          |         |          |                         |          |          |          |          |                 |                |
| <i>Firmicutes</i>            | 0.0009                          | 0.0000   | 0.0016   | 0.0000  | 0.0036   | 0.0003                  | 0.0000   | 0.0011   | 0.0000   | 0.0043   | 0.3311          | 0.6373         |
| <i>Betaproteobacteria</i>    | 0.2517                          | 0.1369   | 0.3425   | 0.0072  | 10.0749  | 0.9576                  | 0.3143   | 10.4682  | 0.0077   | 50.2236  | 0.3936          | 0.6373         |
| <i>Bacteroidia</i>           | 260.7933                        | 290.6565 | 140.9658 | 60.4034 | 440.6102 | 330.5067                | 30.5288  | 190.3503 | 0.6114   | 570.8684 | 0.4325          | 0.6373         |
| <i>Clostridia</i>            | 610.6032                        | 610.4062 | 150.2342 | 40.1500 | 820.3551 | 540.2842                | 520.3424 | 20.8636  | 160.8490 | 910.5987 | 0.4325          | 0.6373         |
| <i>Alphaproteobacteria</i>   | 0.8228                          | 0.2411   | 10.0968  | 0.0000  | 30.0142  | 10.1887                 | 0.0134   | 20.1792  | 0.0000   | 60.3184  | 0.4483          | 0.6373         |
| <i>Anaerolineae</i>          | 0.0000                          | 0.0000   | 0.0000   | 0.0000  | 0.0000   | 0.0050                  | 0.0000   | 0.0186   | 0.0000   | 0.0697   | 0.5083          | 0.6373         |
| <i>Methanobacteria</i>       | 0.0000                          | 0.0000   | 0.0000   | 0.0000  | 0.0000   | 0.0018                  | 0.0000   | 0.0067   | 0.0000   | 0.0251   | 0.5083          | 0.6373         |
| <i>Nitrospira</i>            | 0.0000                          | 0.0000   | 0.0000   | 0.0000  | 0.0000   | 0.0005                  | 0.0000   | 0.0020   | 0.0000   | 0.0076   | 0.5083          | 0.6373         |
| <i>Sphingobacteriia</i>      | 0.0000                          | 0.0000   | 0.0000   | 0.0000  | 0.0000   | 0.0011                  | 0.0000   | 0.0041   | 0.0000   | 0.0152   | 0.5083          | 0.6373         |
| <i>Thermoplasmata</i>        | 0.0000                          | 0.0000   | 0.0000   | 0.0000  | 0.0000   | 0.0003                  | 0.0000   | 0.0011   | 0.0000   | 0.0040   | 0.5083          | 0.6373         |
| <i>Uncultured bacterium</i>  | 0.0000                          | 0.0000   | 0.0000   | 0.0000  | 0.0000   | 0.0003                  | 0.0000   | 0.0011   | 0.0000   | 0.0043   | 0.5083          | 0.6373         |
| <i>Melainabacteria</i>       | 0.0633                          | 0.0000   | 0.1357   | 0.0000  | 0.3812   | 0.0142                  | 0.0000   | 0.0458   | 0.0000   | 0.1711   | 0.5097          | 0.6373         |
| <i>Actinobacteria</i>        | 0.8440                          | 0.2839   | 10.2237  | 0.0143  | 30.2455  | 10.4192                 | 0.7035   | 10.5873  | 0.0038   | 40.8331  | 0.5167          | 0.6373         |
| <i>Coriobacteriia</i>        | 0.4857                          | 0.3626   | 0.4305   | 0.0573  | 10.1080  | 0.7893                  | 0.3324   | 0.9334   | 0.0000   | 30.1898  | 0.5618          | 0.6671         |
| <i>Lentisphaeria</i>         | 0.0121                          | 0.0000   | 0.0328   | 0.0000  | 0.0931   | 0.0019                  | 0.0000   | 0.0050   | 0.0000   | 0.0153   | 0.5770          | 0.6671         |
| <i>Opitutae</i>              | 0.0063                          | 0.0000   | 0.0177   | 0.0000  | 0.0501   | 0.0003                  | 0.0000   | 0.0010   | 0.0000   | 0.0038   | 0.6816          | 0.7642         |
| <i>Fusobacteriia</i>         | 0.0007                          | 0.0000   | 0.0013   | 0.0000  | 0.0032   | 0.0014                  | 0.0000   | 0.0038   | 0.0000   | 0.0125   | 0.7226          | 0.7864         |
| <i>Gammaproteobacteria</i>   | 50.6816                         | 0.0175   | 150.7006 | 0.0000  | 440.5328 | 40.6727                 | 0.1321   | 130.6763 | 0.0000   | 50.6354  | 0.7574          | 0.8007         |
| <i>Mollicutes</i>            | 0.0324                          | 0.0000   | 0.0598   | 0.0000  | 0.1516   | 0.0968                  | 0.0000   | 0.1891   | 0.0000   | 0.4700   | 0.8742          | 0.8985         |
| <i>OPB54</i>                 | 0.0006                          | 0.0000   | 0.0017   | 0.0000  | 0.0049   | 0.1509                  | 0.0000   | 0.5635   | 0.0000   | 20.1086  | 0.9544          | 0.9544         |
| <i>Chloroplast</i>           | 0.0000                          | 0.0000   | 0.0000   | 0.0000  | 0.0000   | 0.0000                  | 0.0000   | 0.0000   | 0.0000   | 0.0000   | NA              | NA             |
| <i>Spirochaetes</i>          | 0.0000                          | 0.0000   | 0.0000   | 0.0000  | 0.0000   | 0.0000                  | 0.0000   | 0.0000   | 0.0000   | 0.0000   | NA              | NA             |
| <i>Synergistia</i>           | 0.0000                          | 0.0000   | 0.0000   | 0.0000  | 0.0000   | 0.0000                  | 0.0000   | 0.0000   | 0.0000   | 0.0000   | NA              | NA             |
| <i>VadinHA17</i>             | 0.0000                          | 0.0000   | 0.0000   | 0.0000  | 0.0000   | 0.0000                  | 0.0000   | 0.0000   | 0.0000   | 0.0000   | NA              | NA             |

SD—standard deviation; NA—not available; *p*-value—calculated with the non-parametric Mann–Whitney test; *p*-adj.—*p* values adjusted with Benjamini–Hochberg FDR for multiple comparisons; red font—statistically significant results ( $p < 0.05$ ).

**Table S3.** The percentage abundance of the intestinal microbiota in the study group of COVID-19 patients and healthy controls at the order level.

| Order                                | COVID-19 patients, n = 8 |          |          |         |          | Controls, n = 14 |          |          |          |          | p-value | p- adj. |
|--------------------------------------|--------------------------|----------|----------|---------|----------|------------------|----------|----------|----------|----------|---------|---------|
|                                      | Mean                     | Median   | SD       | Min.    | Max.     | Mean             | Median   | SD       | Min.     | Max.     |         |         |
| Verrucomicrobiales                   | 0.7296                   | 0.1971   | 10.3843  | 0.0092  | 40.1029  | 0.0238           | 0.0160   | 0.0286   | 0.0000   | 0.0923   | 0.0027  | 0.1356  |
| Cytophagales                         | 0.3251                   | 0.1953   | 0.4565   | 0.0364  | 10.4389  | 0.0888           | 0.0314   | 0.1356   | 0.0000   | 0.3998   | 0.0314  | 0.5809  |
| Neisseriales                         | 0.0122                   | 0.0018   | 0.0296   | 0.0000  | 0.0854   | 0.0010           | 0.0000   | 0.0039   | 0.0000   | 0.0144   | 0.0365  | 0.5809  |
| Propionibacteriales                  | 0.0311                   | 0.0035   | 0.0445   | 0.0000  | 0.1109   | 0.0019           | 0.0000   | 0.0058   | 0.0000   | 0.0217   | 0.0504  | 0.5809  |
| B38                                  | 0.0107                   | 0.0000   | 0.0202   | 0.0000  | 0.0494   | 0.0000           | 0.0000   | 0.0000   | 0.0000   | 0.0000   | 0.0648  | 0.5809  |
| Uncultured bacterium                 | 0.4477                   | 0.3193   | 0.4770   | 0.0652  | 10.5312  | 0.1956           | 0.0473   | 0.2737   | 0.0000   | 0.8772   | 0.0697  | 0.5809  |
| Pasteurellales                       | 0.0000                   | 0.0000   | 0.0000   | 0.0000  | 0.0000   | 0.0028           | 0.0000   | 0.0052   | 0.0000   | 0.0158   | 0.1159  | 0.6450  |
| Burkholderiales                      | 0.2087                   | 0.0886   | 0.3587   | 0.0072  | 10.0749  | 0.9555           | 0.3143   | 10.4697  | 0.0077   | 50.2236  | 0.1618  | 0.6450  |
| Campylobacteriales                   | 0.0000                   | 0.0000   | 0.0000   | 0.0000  | 0.0000   | 0.2294           | 0.0000   | 0.8275   | 0.0000   | 30.1036  | 0.1885  | 0.6450  |
| Pseudomonadales                      | 0.0000                   | 0.0000   | 0.0000   | 0.0000  | 0.0000   | 0.8145           | 0.0000   | 30.0433  | 0.0000   | 110.3882 | 0.1885  | 0.6450  |
| Rhizobiales                          | 0.0225                   | 0.0032   | 0.0347   | 0.0000  | 0.0976   | 0.0019           | 0.0000   | 0.0033   | 0.0000   | 0.0077   | 0.1914  | 0.6450  |
| Actinomycetales                      | 0.0029                   | 0.0000   | 0.0083   | 0.0000  | 0.0235   | 0.0000           | 0.0000   | 0.0000   | 0.0000   | 0.0000   | 0.2193  | 0.6450  |
| Corynebacteriales                    | 0.0040                   | 0.0000   | 0.0113   | 0.0000  | 0.0319   | 0.0000           | 0.0000   | 0.0000   | 0.0000   | 0.0000   | 0.2193  | 0.6450  |
| Deferribacteriales                   | 0.0006                   | 0.0000   | 0.0017   | 0.0000  | 0.0049   | 0.0000           | 0.0000   | 0.0000   | 0.0000   | 0.0000   | 0.2193  | 0.6450  |
| Flavobacteriales                     | 0.0004                   | 0.0000   | 0.0012   | 0.0000  | 0.0035   | 0.0000           | 0.0000   | 0.0000   | 0.0000   | 0.0000   | 0.2193  | 0.6450  |
| {Unknown Class}<br>Bacteroidetes     | 0.0014                   | 0.0000   | 0.0039   | 0.0000  | 0.0111   | 0.0000           | 0.0000   | 0.0000   | 0.0000   | 0.0000   | 0.2193  | 0.6450  |
| {Unknown Phylum}<br>Bacteria         | 0.0010                   | 0.0000   | 0.0028   | 0.0000  | 0.0078   | 0.0000           | 0.0000   | 0.0000   | 0.0000   | 0.0000   | 0.2193  | 0.6450  |
| Desulfovibrionales                   | 0.0267                   | 0.0211   | 0.0288   | 0.0000  | 0.0838   | 0.0194           | 0.0019   | 0.0384   | 0.0000   | 0.1412   | 0.2732  | 0.6517  |
| Kordiimonadales                      | 0.0330                   | 0.0000   | 0.0918   | 0.0000  | 0.2602   | 0.0096           | 0.0000   | 0.0358   | 0.0000   | 0.1338   | 0.2774  | 0.6517  |
| Thermoanaerobacteriales              | 0.0149                   | 0.0000   | 0.0411   | 0.0000  | 0.1165   | 0.0063           | 0.0000   | 0.0234   | 0.0000   | 0.0876   | 0.2774  | 0.6517  |
| Uncultured sediment<br>bacterium     | 0.0000                   | 0.0000   | 0.0000   | 0.0000  | 0.0000   | 0.0006           | 0.0000   | 0.0014   | 0.0000   | 0.0040   | 0.3050  | 0.6517  |
| Selenomonadales                      | 0.2906                   | 0.3095   | 0.1940   | 0.0081  | 0.5639   | 0.2598           | 0.1076   | 0.3600   | 0.0000   | 0.9634   | 0.3567  | 0.6517  |
| Clostridiales                        | 620.7777                 | 610.4062 | 170.3990 | 40.1500 | 910.3483 | 540.2660         | 520.3099 | 20.8667  | 160.8490 | 910.5987 | 0.3568  | 0.6517  |
| Erysipelotrichales                   | 10.0187                  | 10.1259  | 0.5006   | 0.2125  | 10.4662  | 10.7849          | 0.5518   | 20.8593  | 0.0978   | 90.8891  | 0.3568  | 0.6517  |
| Bacteroidales                        | 250.9044                 | 290.6565 | 160.0774 | 50.8086 | 440.6102 | 330.5067         | 30.5288  | 190.3503 | 0.6114   | 570.8684 | 0.4325  | 0.6517  |
| Lactobacillales                      | 0.6005                   | 0.0802   | 10.3631  | 0.0046  | 30.9579  | 0.1044           | 0.0490   | 0.1679   | 0.0038   | 0.6424   | 0.4325  | 0.6517  |
| Rhodospirillales                     | 0.3963                   | 0.0892   | 0.5789   | 0.0000  | 10.4108  | 10.1767          | 0.0058   | 20.1791  | 0.0000   | 60.3184  | 0.4418  | 0.6517  |
| Halanaerobiales                      | 0.0737                   | 0.0025   | 0.1943   | 0.0000  | 0.5542   | 0.0120           | 0.0000   | 0.0258   | 0.0000   | 0.0815   | 0.4519  | 0.6517  |
| Bacillales                           | 0.0191                   | 0.0000   | 0.0539   | 0.0000  | 0.1525   | 0.2002           | 0.0000   | 0.6850   | 0.0000   | 20.5763  | 0.4857  | 0.6517  |
| Micrococcales                        | 0.0167                   | 0.0040   | 0.0328   | 0.0000  | 0.0952   | 0.0283           | 0.0000   | 0.0751   | 0.0000   | 0.2780   | 0.5023  | 0.6517  |
| Anaerolineales                       | 0.0000                   | 0.0000   | 0.0000   | 0.0000  | 0.0000   | 0.0050           | 0.0000   | 0.0186   | 0.0000   | 0.0697   | 0.5083  | 0.6517  |
| Hydrogenophilales                    | 0.0000                   | 0.0000   | 0.0000   | 0.0000  | 0.0000   | 0.0011           | 0.0000   | 0.0041   | 0.0000   | 0.0153   | 0.5083  | 0.6517  |
| Methanobacteriales                   | 0.0000                   | 0.0000   | 0.0000   | 0.0000  | 0.0000   | 0.0018           | 0.0000   | 0.0067   | 0.0000   | 0.0251   | 0.5083  | 0.6517  |
| Nitrospirales                        | 0.0000                   | 0.0000   | 0.0000   | 0.0000  | 0.0000   | 0.0005           | 0.0000   | 0.0020   | 0.0000   | 0.0076   | 0.5083  | 0.6517  |
| Puniceococcales                      | 0.0000                   | 0.0000   | 0.0000   | 0.0000  | 0.0000   | 0.0003           | 0.0000   | 0.0010   | 0.0000   | 0.0038   | 0.5083  | 0.6517  |
| Sphingobacteriales                   | 0.0000                   | 0.0000   | 0.0000   | 0.0000  | 0.0000   | 0.0011           | 0.0000   | 0.0041   | 0.0000   | 0.0152   | 0.5083  | 0.6517  |
| Sphingomonadales                     | 0.0000                   | 0.0000   | 0.0000   | 0.0000  | 0.0000   | 0.0005           | 0.0000   | 0.0020   | 0.0000   | 0.0076   | 0.5083  | 0.6517  |
| Thermoplasmatales                    | 0.0000                   | 0.0000   | 0.0000   | 0.0000  | 0.0000   | 0.0003           | 0.0000   | 0.0011   | 0.0000   | 0.0040   | 0.5083  | 0.6517  |
| Uncultured bacterium 05              | 0.0000                   | 0.0000   | 0.0000   | 0.0000  | 0.0000   | 0.0003           | 0.0000   | 0.0011   | 0.0000   | 0.0043   | 0.5083  | 0.6517  |
| Coriobacteriales                     | 0.5005                   | 0.3626   | 0.4154   | 0.0736  | 10.1080  | 0.7893           | 0.3324   | 0.9334   | 0.0000   | 30.1898  | 0.6573  | 0.8216  |
| RF9                                  | 0.0115                   | 0.0000   | 0.0303   | 0.0000  | 0.0864   | 0.0901           | 0.0000   | 0.1791   | 0.0000   | 0.4700   | 0.6956  | 0.8402  |
| Bifidobacteriales                    | 0.8290                   | 0.2393   | 10.1963  | 0.0212  | 30.1712  | 10.3891          | 0.6926   | 10.5926  | 0.0038   | 40.8331  | 0.7074  | 0.8402  |
| Fusobacteriales                      | 0.0007                   | 0.0000   | 0.0013   | 0.0000  | 0.0032   | 0.0014           | 0.0000   | 0.0038   | 0.0000   | 0.0125   | 0.7226  | 0.8402  |
| {Unknown Class}<br>Firmicutes        | 0.0004                   | 0.0000   | 0.0011   | 0.0000  | 0.0032   | 0.0003           | 0.0000   | 0.0011   | 0.0000   | 0.0043   | 0.7844  | 0.8914  |
| Enterobacteriales                    | 50.6620                  | 0.0123   | 150.6936 | 0.0000  | 440.4962 | 30.8389          | 0.0546   | 130.4746 | 0.0000   | 50.6274  | 0.8623  | 0.9190  |
| Victivallales                        | 0.0004                   | 0.0000   | 0.0012   | 0.0000  | 0.0035   | 0.0019           | 0.0000   | 0.0050   | 0.0000   | 0.0153   | 0.8638  | 0.9190  |
| Xanthomonadales                      | 0.0009                   | 0.0000   | 0.0025   | 0.0000  | 0.0071   | 0.0165           | 0.0000   | 0.0559   | 0.0000   | 0.2097   | 0.8638  | 0.9190  |
| Gastranaerophilales                  | 0.0156                   | 0.0000   | 0.0442   | 0.0000  | 0.1251   | 0.0142           | 0.0000   | 0.0458   | 0.0000   | 0.1711   | 0.9544  | 0.9544  |
| NB10n                                | 0.0082                   | 0.0000   | 0.0231   | 0.0000  | 0.0652   | 0.0067           | 0.0000   | 0.0227   | 0.0000   | 0.0851   | 0.9544  | 0.9544  |
| Uncultured bacterium 04              | 0.0006                   | 0.0000   | 0.0017   | 0.0000  | 0.0049   | 0.1509           | 0.0000   | 0.5635   | 0.0000   | 20.1086  | 0.9544  | 0.9544  |
| Anaeroplasmatales                    | 0.0000                   | 0.0000   | 0.0000   | 0.0000  | 0.0000   | 0.0000           | 0.0000   | 0.0000   | 0.0000   | 0.0000   | NA      | NA      |
| Chloroplast transformation<br>vector | 0.0000                   | 0.0000   | 0.0000   | 0.0000  | 0.0000   | 0.0000           | 0.0000   | 0.0000   | 0.0000   | 0.0000   | NA      | NA      |
| pL300PrnG10LOCT1                     |                          |          |          |         |          |                  |          |          |          |          |         |         |

|                                          |        |        |        |        |        |        |        |        |        |        |    |    |
|------------------------------------------|--------|--------|--------|--------|--------|--------|--------|--------|--------|--------|----|----|
| <i>Chorispora bungeana</i>               | 0.0000 | 0.0000 | 0.0000 | 0.0000 | 0.0000 | 0.0000 | 0.0000 | 0.0000 | 0.0000 | 0.0000 | NA | NA |
| <i>Cocos nucifera</i> (coconut palm)     | 0.0000 | 0.0000 | 0.0000 | 0.0000 | 0.0000 | 0.0000 | 0.0000 | 0.0000 | 0.0000 | 0.0000 | NA | NA |
| <i>Fraxinus excelsior</i> (European ash) | 0.0000 | 0.0000 | 0.0000 | 0.0000 | 0.0000 | 0.0000 | 0.0000 | 0.0000 | 0.0000 | 0.0000 | NA | NA |
| <i>Helianthus giganteus</i>              | 0.0000 | 0.0000 | 0.0000 | 0.0000 | 0.0000 | 0.0000 | 0.0000 | 0.0000 | 0.0000 | 0.0000 | NA | NA |
| <i>Phoenix dactylifera</i> (date palm)   | 0.0000 | 0.0000 | 0.0000 | 0.0000 | 0.0000 | 0.0000 | 0.0000 | 0.0000 | 0.0000 | 0.0000 | NA | NA |
| <i>Portulaca oleracea</i>                | 0.0000 | 0.0000 | 0.0000 | 0.0000 | 0.0000 | 0.0000 | 0.0000 | 0.0000 | 0.0000 | 0.0000 | NA | NA |
| <i>Rickettsiales</i>                     | 0.0000 | 0.0000 | 0.0000 | 0.0000 | 0.0000 | 0.0000 | 0.0000 | 0.0000 | 0.0000 | 0.0000 | NA | NA |
| <i>Spirochaetales</i>                    | 0.0000 | 0.0000 | 0.0000 | 0.0000 | 0.0000 | 0.0000 | 0.0000 | 0.0000 | 0.0000 | 0.0000 | NA | NA |
| <i>Synergistales</i>                     | 0.0000 | 0.0000 | 0.0000 | 0.0000 | 0.0000 | 0.0000 | 0.0000 | 0.0000 | 0.0000 | 0.0000 | NA | NA |
| <i>Syngonanthus chrysanthus</i>          | 0.0000 | 0.0000 | 0.0000 | 0.0000 | 0.0000 | 0.0000 | 0.0000 | 0.0000 | 0.0000 | 0.0000 | NA | NA |
| Uncultured bacterium 01                  | 0.0000 | 0.0000 | 0.0000 | 0.0000 | 0.0000 | 0.0000 | 0.0000 | 0.0000 | 0.0000 | 0.0000 | NA | NA |
| Uncultured bacterium 03                  | 0.0000 | 0.0000 | 0.0000 | 0.0000 | 0.0000 | 0.0000 | 0.0000 | 0.0000 | 0.0000 | 0.0000 | NA | NA |
| Uncultured organism                      | 0.0000 | 0.0000 | 0.0000 | 0.0000 | 0.0000 | 0.0000 | 0.0000 | 0.0000 | 0.0000 | 0.0000 | NA | NA |
| VadinHA64                                | 0.0000 | 0.0000 | 0.0000 | 0.0000 | 0.0000 | 0.0000 | 0.0000 | 0.0000 | 0.0000 | 0.0000 | NA | NA |

SD—standard deviation; NA—not available; *p*-value—calculated with the non-parametric Mann–Whitney test; *p*-adj.—*p* values adjusted with Benjamini–Hochberg FDR for multiple comparisons; red font—statistically significant results ( $p < 0.05$ ).

**Table S4.** The percentage abundance of the intestinal microbiota in the study group of COVID-19 patients and healthy controls at the family level.

| Family                                   | COVID-19 patients, <i>n</i> = 8 |          |         |          |          | Controls, <i>n</i> = 14 |          |          |         |          | <i>p</i> - value | <i>p</i> - adj. |
|------------------------------------------|---------------------------------|----------|---------|----------|----------|-------------------------|----------|----------|---------|----------|------------------|-----------------|
|                                          | Mean                            | Median   | SD      | Min.     | Max.     | Mean                    | Median   | SD       | Min.    | Max.     |                  |                 |
| <i>Verrucomicrobiaceae</i>               | 0.7759                          | 0.2940   | 10.3628 | 0.0496   | 40.1029  | 0.0238                  | 0.0160   | 0.0286   | 0.0000  | 0.0923   | <b>0.0004</b>    | <b>0.0335</b>   |
| <i>Neisseriaceae</i>                     | 0.0179                          | 0.0037   | 0.0312  | 0.0000   | 0.0854   | 0.0010                  | 0.0000   | 0.0039   | 0.0000  | 0.0144   | <b>0.0091</b>    | 0.3319          |
| <i>Leuconostocaceae</i>                  | 0.0058                          | 0.0000   | 0.0104  | 0.0000   | 0.0285   | 0.0000                  | 0.0000   | 0.0000   | 0.0000  | 0.0000   | <b>0.0191</b>    | 0.3319          |
| <i>Phyllobacteriaceae</i>                | 0.0077                          | 0.0000   | 0.0133  | 0.0000   | 0.0366   | 0.0000                  | 0.0000   | 0.0000   | 0.0000  | 0.0000   | <b>0.0191</b>    | 0.3319          |
| <i>Uncultured bacterium-06</i>           | 0.0130                          | 0.0000   | 0.0198  | 0.0000   | 0.0494   | 0.0000                  | 0.0000   | 0.0000   | 0.0000  | 0.0000   | <b>0.0191</b>    | 0.3319          |
| <i>Lachnospiraceae</i>                   | 380.4910                        | 370.9509 | 70.9057 | 240.1232 | 490.4323 | 290.3338                | 280.5685 | 110.9055 | 60.0064 | 570.6092 | <b>0.0265</b>    | 0.3848          |
| <i>Clostridiaceae 1</i>                  | 0.6221                          | 0.5478   | 0.4530  | 0.0784   | 10.4514  | 0.2904                  | 0.1021   | 0.4307   | 0.0119  | 10.3609  | <b>0.0316</b>    | 0.3922          |
| <i>Cytophagaceae</i>                     | 0.1704                          | 0.1953   | 0.0772  | 0.0364   | 0.2621   | 0.0888                  | 0.0314   | 0.1356   | 0.0000  | 0.3998   | 0.0515           | 0.5127          |
| <i>Nocardiaceae</i>                      | 0.0060                          | 0.0000   | 0.0119  | 0.0000   | 0.0319   | 0.0000                  | 0.0000   | 0.0000   | 0.0000  | 0.0000   | 0.0648           | 0.5127          |
| <i>PAUC34f</i>                           | 0.0009                          | 0.0000   | 0.0018  | 0.0000   | 0.0049   | 0.0000                  | 0.0000   | 0.0000   | 0.0000  | 0.0000   | 0.0648           | 0.5127          |
| {Unknown Family}<br><i>Bacteroidales</i> | 0.0016                          | 0.0000   | 0.0037  | 0.0000   | 0.0106   | 0.0000                  | 0.0000   | 0.0000   | 0.0000  | 0.0000   | 0.0648           | 0.5127          |
| <i>Uncultured bacterium-02</i>           | 0.4219                          | 0.2925   | 0.4757  | 0.0652   | 10.5312  | 0.1956                  | 0.0473   | 0.2737   | 0.0000  | 0.8772   | 0.0809           | 0.5612          |
| <i>Peptostreptococcaceae</i>             | 10.2765                         | 0.1600   | 20.7242 | 0.0071   | 70.8880  | 10.4430                 | 0.7267   | 20.3884  | 0.0038  | 80.9284  | 0.0945           | 0.5612          |
| <i>Kordiimonadaceae</i>                  | 0.0492                          | 0.0000   | 0.0966  | 0.0000   | 0.2602   | 0.0096                  | 0.0000   | 0.0358   | 0.0000  | 0.1338   | 0.1046           | 0.5612          |
| <i>Pasteurellaceae</i>                   | 0.0000                          | 0.0000   | 0.0000  | 0.0000   | 0.0000   | 0.0028                  | 0.0000   | 0.0052   | 0.0000  | 0.0158   | 0.1159           | 0.5612          |
| <i>Erysipelotrichaceae</i>               | 10.1570                         | 10.2447  | 0.3857  | 0.2911   | 10.4662  | 10.7849                 | 0.5518   | 20.8593  | 0.0978  | 90.8891  | 0.1246           | 0.5612          |
| <i>Streptococcaceae</i>                  | 0.8009                          | 0.1327   | 10.3640 | 0.0064   | 30.7607  | 0.0526                  | 0.0367   | 0.0646   | 0.0000  | 0.2346   | 0.1246           | 0.5612          |
| <i>Prevotellaceae</i>                    | 0.7822                          | 0.5013   | 0.9208  | 0.0000   | 20.8523  | 50.7599                 | 20.0447  | 80.8387  | 0.0072  | 270.7800 | 0.1423           | 0.5612          |
| <i>Propionibacteriaceae</i>              | 0.0173                          | 0.0000   | 0.0315  | 0.0000   | 0.0841   | 0.0019                  | 0.0000   | 0.0058   | 0.0000  | 0.0217   | 0.1778           | 0.5612          |
| <i>Veillonellaceae</i>                   | 0.2593                          | 0.2688   | 0.1903  | 0.0041   | 0.5516   | 0.1755                  | 0.0644   | 0.2683   | 0.0000  | 0.8421   | 0.1827           | 0.5612          |
| <i>Desulfovibrionaceae</i>               | 0.0270                          | 0.0211   | 0.0285  | 0.0000   | 0.0838   | 0.0194                  | 0.0019   | 0.0384   | 0.0000  | 0.1412   | 0.1840           | 0.5612          |
| <i>Campylobacteraceae</i>                | 0.0000                          | 0.0000   | 0.0000  | 0.0000   | 0.0000   | 0.2294                  | 0.0000   | 0.8275   | 0.0000  | 30.1036  | 0.1885           | 0.5612          |
| <i>Uncultured</i>                        | 0.0000                          | 0.0000   | 0.0000  | 0.0000   | 0.0000   | 0.0068                  | 0.0000   | 0.0175   | 0.0000  | 0.0642   | 0.1885           | 0.5612          |
| <i>Actinomycetaceae</i>                  | 0.0029                          | 0.0000   | 0.0083  | 0.0000   | 0.0235   | 0.0000                  | 0.0000   | 0.0000   | 0.0000  | 0.0000   | 0.2193           | 0.5612          |
| <i>Aerococcaceae</i>                     | 0.0006                          | 0.0000   | 0.0017  | 0.0000   | 0.0049   | 0.0000                  | 0.0000   | 0.0000   | 0.0000  | 0.0000   | 0.2193           | 0.5612          |
| <i>Flavobacteriaceae</i>                 | 0.0004                          | 0.0000   | 0.0012  | 0.0000   | 0.0035   | 0.0000                  | 0.0000   | 0.0000   | 0.0000  | 0.0000   | 0.2193           | 0.5612          |
| <i>ML635f-40 aquatic group</i>           | 0.0009                          | 0.0000   | 0.0025  | 0.0000   | 0.0071   | 0.0000                  | 0.0000   | 0.0000   | 0.0000  | 0.0000   | 0.2193           | 0.5612          |
| <i>Rs-D42</i>                            | 0.0054                          | 0.0000   | 0.0152  | 0.0000   | 0.0430   | 0.0000                  | 0.0000   | 0.0000   | 0.0000  | 0.0000   | 0.2193           | 0.5612          |
| <i>Thermoanaerobacteraceae</i>           | 0.0003                          | 0.0000   | 0.0009  | 0.0000   | 0.0025   | 0.0000                  | 0.0000   | 0.0000   | 0.0000  | 0.0000   | 0.2193           | 0.5612          |
| <i>Uncultured Bacillales bacterium</i>   | 0.0062                          | 0.0000   | 0.0174  | 0.0000   | 0.0494   | 0.0000                  | 0.0000   | 0.0000   | 0.0000  | 0.0000   | 0.2193           | 0.5612          |
| <i>Uncultured Firmicutes bacterium</i>   | 0.0018                          | 0.0000   | 0.0050  | 0.0000   | 0.0141   | 0.0000                  | 0.0000   | 0.0000   | 0.0000  | 0.0000   | 0.2193           | 0.5612          |
| <i>Unidentified</i>                      | 0.0004                          | 0.0000   | 0.0012  | 0.0000   | 0.0035   | 0.0000                  | 0.0000   | 0.0000   | 0.0000  | 0.0000   | 0.2193           | 0.5612          |
| {Unknown Class}<br><i>Bacteroidetes</i>  | 0.0014                          | 0.0000   | 0.0039  | 0.0000   | 0.0111   | 0.0000                  | 0.0000   | 0.0000   | 0.0000  | 0.0000   | 0.2193           | 0.5612          |
| {Unknown Phylum}<br><i>Bacteria</i>      | 0.0010                          | 0.0000   | 0.0028  | 0.0000   | 0.0078   | 0.0000                  | 0.0000   | 0.0000   | 0.0000  | 0.0000   | 0.2193           | 0.5612          |
| <i>Enterococcaceae</i>                   | 0.0316                          | 0.0000   | 0.0628  | 0.0000   | 0.1687   | 0.0005                  | 0.0000   | 0.0019   | 0.0000  | 0.0072   | 0.2299           | 0.5715          |
| <i>Bradyrhizobiaceae</i>                 | 0.0157                          | 0.0000   | 0.0235  | 0.0000   | 0.0610   | 0.0014                  | 0.0000   | 0.0029   | 0.0000  | 0.0077   | 0.2583           | 0.6242          |
| <i>Peptococcaceae</i>                    | 0.0013                          | 0.0000   | 0.0026  | 0.0000   | 0.0071   | 0.0003                  | 0.0000   | 0.0010   | 0.0000  | 0.0038   | 0.2774           | 0.6522          |
| <i>Bacillaceae</i>                       | 0.0000                          | 0.0000   | 0.0000  | 0.0000   | 0.0000   | 0.0291                  | 0.0000   | 0.0836   | 0.0000  | 0.3029   | 0.3050           | 0.6633          |
| <i>Moraxellaceae</i>                     | 0.0000                          | 0.0000   | 0.0000  | 0.0000   | 0.0000   | 0.0011                  | 0.0000   | 0.0028   | 0.0000  | 0.0080   | 0.3050           | 0.6633          |
| <i>Uncultured sediment bacterium</i>     | 0.0000                          | 0.0000   | 0.0000  | 0.0000   | 0.0000   | 0.0006                  | 0.0000   | 0.0014   | 0.0000  | 0.0040   | 0.3050           | 0.6633          |
| <i>Rhodospirillaceae</i>                 | 0.4839                          | 0.2362   | 0.5640  | 0.0000   | 10.4108  | 10.1767                 | 0.0058   | 20.1791  | 0.0000  | 60.3184  | 0.3276           | 0.6951          |
| <i>Christensenellaceae</i>               | 0.3832                          | 0.1579   | 0.4826  | 0.0183   | 10.3839  | 0.7822                  | 0.5379   | 10.0825  | 0.0000  | 40.2518  | 0.4324           | 0.7103          |
| <i>S24-7</i>                             | 0.2614                          | 0.1705   | 0.2158  | 0.0366   | 0.6101   | 0.2418                  | 0.0549   | 0.2731   | 0.0098  | 0.8638   | 0.4325           | 0.7103          |
| <i>Acidaminococcaceae</i>                | 0.1189                          | 0.0823   | 0.1313  | 0.0000   | 0.3084   | 0.0843                  | 0.0140   | 0.1358   | 0.0000  | 0.3732   | 0.4665           | 0.7103          |
| <i>Defluviitaleaceae</i>                 | 0.0604                          | 0.0437   | 0.0522  | 0.0107   | 0.1618   | 0.0817                  | 0.0378   | 0.1412   | 0.0000  | 0.4489   | 0.4723           | 0.7103          |
| <i>Ruminococcaceae</i>                   | 160.9835                        | 170.8042 | 70.4216 | 50.4500  | 30.1650  | 220.2637                | 220.4142 | 130.4185 | 20.1080 | 490.6346 | 0.4736           | 0.7103          |
| <i>VadinBB60</i>                         | 0.0283                          | 0.0000   | 0.0800  | 0.0000   | 0.2263   | 0.0274                  | 0.0000   | 0.0685   | 0.0000  | 0.2308   | 0.4857           | 0.7103          |

|                                                   |          |          |          |         |          |          |          |          |        |          |        |        |
|---------------------------------------------------|----------|----------|----------|---------|----------|----------|----------|----------|--------|----------|--------|--------|
| Anaerolineaceae                                   | 0.0000   | 0.0000   | 0.0000   | 0.0000  | 0.0000   | 0.0050   | 0.0000   | 0.0186   | 0.0000 | 0.0697   | 0.5083 | 0.7103 |
| Carnobacteriaceae                                 | 0.0000   | 0.0000   | 0.0000   | 0.0000  | 0.0000   | 0.0003   | 0.0000   | 0.0010   | 0.0000 | 0.0038   | 0.5083 | 0.7103 |
| Family XI-02                                      | 0.0000   | 0.0000   | 0.0000   | 0.0000  | 0.0000   | 0.0005   | 0.0000   | 0.0019   | 0.0000 | 0.0072   | 0.5083 | 0.7103 |
| Hydrogenophilaceae                                | 0.0000   | 0.0000   | 0.0000   | 0.0000  | 0.0000   | 0.0011   | 0.0000   | 0.0041   | 0.0000 | 0.0153   | 0.5083 | 0.7103 |
| Methanobacteriaceae                               | 0.0000   | 0.0000   | 0.0000   | 0.0000  | 0.0000   | 0.0018   | 0.0000   | 0.0067   | 0.0000 | 0.0251   | 0.5083 | 0.7103 |
| Methylobacteriaceae                               | 0.0000   | 0.0000   | 0.0000   | 0.0000  | 0.0000   | 0.0005   | 0.0000   | 0.0020   | 0.0000 | 0.0076   | 0.5083 | 0.7103 |
| Nitrospiraceae                                    | 0.0000   | 0.0000   | 0.0000   | 0.0000  | 0.0000   | 0.0005   | 0.0000   | 0.0020   | 0.0000 | 0.0076   | 0.5083 | 0.7103 |
| Paenibacillaceae                                  | 0.0000   | 0.0000   | 0.0000   | 0.0000  | 0.0000   | 0.0027   | 0.0000   | 0.0102   | 0.0000 | 0.0383   | 0.5083 | 0.7103 |
| Pseudomonadaceae                                  | 0.0000   | 0.0000   | 0.0000   | 0.0000  | 0.0000   | 0.8134   | 0.0000   | 30.0436  | 0.0000 | 110.3882 | 0.5083 | 0.7103 |
| Puniceicoccaceae                                  | 0.0000   | 0.0000   | 0.0000   | 0.0000  | 0.0000   | 0.0003   | 0.0000   | 0.0010   | 0.0000 | 0.0038   | 0.5083 | 0.7103 |
| Sphingobacteriaceae                               | 0.0000   | 0.0000   | 0.0000   | 0.0000  | 0.0000   | 0.0011   | 0.0000   | 0.0041   | 0.0000 | 0.0152   | 0.5083 | 0.7103 |
| Sphingomonadaceae                                 | 0.0000   | 0.0000   | 0.0000   | 0.0000  | 0.0000   | 0.0005   | 0.0000   | 0.0020   | 0.0000 | 0.0076   | 0.5083 | 0.7103 |
| Thermoplasmatales Incertae Sedis                  | 0.0000   | 0.0000   | 0.0000   | 0.0000  | 0.0000   | 0.0003   | 0.0000   | 0.0011   | 0.0000 | 0.0040   | 0.5083 | 0.7103 |
| Uncultured bacterium-07                           | 0.0000   | 0.0000   | 0.0000   | 0.0000  | 0.0000   | 0.0003   | 0.0000   | 0.0011   | 0.0000 | 0.0043   | 0.5083 | 0.7103 |
| Uncultured bacterium-08                           | 0.0000   | 0.0000   | 0.0000   | 0.0000  | 0.0000   | 0.0061   | 0.0000   | 0.0227   | 0.0000 | 0.0851   | 0.5083 | 0.7103 |
| Family XIII                                       | 0.0315   | 0.0267   | 0.0299   | 0.0041  | 0.0980   | 0.0400   | 0.0106   | 0.0607   | 0.0000 | 0.2051   | 0.5143 | 0.7103 |
| Oxalobacteraceae                                  | 0.0015   | 0.0000   | 0.0030   | 0.0000  | 0.0081   | 0.1317   | 0.0000   | 0.4917   | 0.0000 | 10.8399  | 0.5770 | 0.7843 |
| Alcaligenaceae                                    | 0.2372   | 0.1349   | 0.3502   | 0.0072  | 10.0749  | 0.8238   | 0.1918   | 10.4666  | 0.0000 | 50.2236  | 0.6087 | 0.8024 |
| Porphyromonadaceae                                | 40.0848  | 40.0886  | 20.0206  | 0.4653  | 60.7497  | 50.3344  | 40.7000  | 40.4557  | 0.0308 | 120.8743 | 0.6087 | 0.8024 |
| Uncultured bacterium-05                           | 0.0009   | 0.0000   | 0.0018   | 0.0000  | 0.0049   | 0.1509   | 0.0000   | 0.5635   | 0.0000 | 20.1086  | 0.6481 | 0.8240 |
| Micrococcaceae                                    | 0.0138   | 0.0030   | 0.0329   | 0.0000  | 0.0952   | 0.0283   | 0.0000   | 0.0751   | 0.0000 | 0.2780   | 0.6547 | 0.8240 |
| Coriobacteriaceae                                 | 0.5094   | 0.3626   | 0.4081   | 0.0736  | 10.1080  | 0.7893   | 0.3324   | 0.9334   | 0.0000 | 30.1898  | 0.6573 | 0.8240 |
| Family III                                        | 0.0146   | 0.0000   | 0.0412   | 0.0000  | 0.1165   | 0.0063   | 0.0000   | 0.0234   | 0.0000 | 0.0876   | 0.6816 | 0.8240 |
| Uncultured organism-02                            | 0.0020   | 0.0000   | 0.0056   | 0.0000  | 0.0159   | 0.0006   | 0.0000   | 0.0022   | 0.0000 | 0.0080   | 0.6816 | 0.8240 |
| Uncultured bacterium-09                           | 0.0080   | 0.0000   | 0.0204   | 0.0000  | 0.0582   | 0.0807   | 0.0000   | 0.1680   | 0.0000 | 0.4700   | 0.6956 | 0.8240 |
| Bacteroidaceae                                    | 210.0875 | 210.2925 | 140.0068 | 30.0512 | 40.1683  | 190.5739 | 160.7984 | 140.7254 | 0.2653 | 430.1085 | 0.7074 | 0.8240 |
| Rikenellaceae                                     | 10.2424  | 10.0539  | 0.7147   | 0.1596  | 20.5915  | 20.5900  | 10.3893  | 30.4216  | 0.0152 | 120.0497 | 0.7074 | 0.8240 |
| Lactobacillaceae                                  | 0.0186   | 0.0000   | 0.0352   | 0.0000  | 0.0956   | 0.0509   | 0.0000   | 0.1679   | 0.0000 | 0.6321   | 0.7103 | 0.8240 |
| {Unknown Family} Clostridiales                    | 0.0015   | 0.0000   | 0.0028   | 0.0000  | 0.0065   | 0.0030   | 0.0000   | 0.0092   | 0.0000 | 0.0342   | 0.7226 | 0.8272 |
| Halanaerobiaceae                                  | 0.0719   | 0.0000   | 0.1950   | 0.0000  | 0.5542   | 0.0120   | 0.0000   | 0.0258   | 0.0000 | 0.0815   | 0.7727 | 0.8425 |
| CFT112H7                                          | 0.0003   | 0.0000   | 0.0008   | 0.0000  | 0.0024   | 0.0009   | 0.0000   | 0.0034   | 0.0000 | 0.0125   | 0.7844 | 0.8425 |
| Fusobacteriaceae                                  | 0.0004   | 0.0000   | 0.0011   | 0.0000  | 0.0032   | 0.0005   | 0.0000   | 0.0020   | 0.0000 | 0.0076   | 0.7844 | 0.8425 |
| Uncultured organism-03                            | 0.0013   | 0.0000   | 0.0037   | 0.0000  | 0.0106   | 0.0095   | 0.0000   | 0.0354   | 0.0000 | 0.1326   | 0.7844 | 0.8425 |
| {Unknown Class} Firmicutes                        | 0.0004   | 0.0000   | 0.0011   | 0.0000  | 0.0032   | 0.0003   | 0.0000   | 0.0011   | 0.0000 | 0.0043   | 0.7844 | 0.8425 |
| Enterobacteriaceae                                | 80.4430  | 0.0175   | 160.4994 | 0.0000  | 440.4962 | 30.8389  | 0.0546   | 130.4746 | 0.0000 | 50.6274  | 0.8082 | 0.8575 |
| Victivallaceae                                    | 0.0004   | 0.0000   | 0.0012   | 0.0000  | 0.0035   | 0.0019   | 0.0000   | 0.0050   | 0.0000 | 0.0153   | 0.8638 | 0.8849 |
| Xanthomonadaceae                                  | 0.0009   | 0.0000   | 0.0025   | 0.0000  | 0.0071   | 0.0165   | 0.0000   | 0.0559   | 0.0000 | 0.2097   | 0.8638 | 0.8849 |
| Bifidobacteriaceae                                | 0.9722   | 0.3390   | 10.1781  | 0.0212  | 30.1712  | 10.3891  | 0.6926   | 10.5926  | 0.0038 | 40.8331  | 0.8645 | 0.8849 |
| Uncultured bacterium-04                           | 0.0156   | 0.0000   | 0.0442   | 0.0000  | 0.1251   | 0.0142   | 0.0000   | 0.0458   | 0.0000 | 0.1711   | 0.9544 | 0.9653 |
| Planococcaceae                                    | 0.0286   | 0.0000   | 0.0567   | 0.0000  | 0.1525   | 0.1683   | 0.0000   | 0.5953   | 0.0000 | 20.2351  | 0.9653 | 0.9653 |
| Anaeroplasmataceae                                | 0.0000   | 0.0000   | 0.0000   | 0.0000  | 0.0000   | 0.0000   | 0.0000   | 0.0000   | 0.0000 | 0.0000   | NA     | NA     |
| BS11 gut group                                    | 0.0000   | 0.0000   | 0.0000   | 0.0000  | 0.0000   | 0.0000   | 0.0000   | 0.0000   | 0.0000 | 0.0000   | NA     | NA     |
| Burkholderiaceae                                  | 0.0000   | 0.0000   | 0.0000   | 0.0000  | 0.0000   | 0.0000   | 0.0000   | 0.0000   | 0.0000 | 0.0000   | NA     | NA     |
| Chloroplast transformation vector pL3-PrmG10L-CT1 | 0.0000   | 0.0000   | 0.0000   | 0.0000  | 0.0000   | 0.0000   | 0.0000   | 0.0000   | 0.0000 | 0.0000   | NA     | NA     |
| Chorispora bungeana                               | 0.0000   | 0.0000   | 0.0000   | 0.0000  | 0.0000   | 0.0000   | 0.0000   | 0.0000   | 0.0000 | 0.0000   | NA     | NA     |
| Cocos nucifera (coconut palm)                     | 0.0000   | 0.0000   | 0.0000   | 0.0000  | 0.0000   | 0.0000   | 0.0000   | 0.0000   | 0.0000 | 0.0000   | NA     | NA     |
| Cryomorphaceae                                    | 0.0000   | 0.0000   | 0.0000   | 0.0000  | 0.0000   | 0.0000   | 0.0000   | 0.0000   | 0.0000 | 0.0000   | NA     | NA     |
| Eubacteriaceae                                    | 0.0000   | 0.0000   | 0.0000   | 0.0000  | 0.0000   | 0.0000   | 0.0000   | 0.0000   | 0.0000 | 0.0000   | NA     | NA     |
| Family XI-01                                      | 0.0000   | 0.0000   | 0.0000   | 0.0000  | 0.0000   | 0.0000   | 0.0000   | 0.0000   | 0.0000 | 0.0000   | NA     | NA     |
| Fraxinus excelsior (European ash)                 | 0.0000   | 0.0000   | 0.0000   | 0.0000  | 0.0000   | 0.0000   | 0.0000   | 0.0000   | 0.0000 | 0.0000   | NA     | NA     |
| Helianthus giganteus                              | 0.0000   | 0.0000   | 0.0000   | 0.0000  | 0.0000   | 0.0000   | 0.0000   | 0.0000   | 0.0000 | 0.0000   | NA     | NA     |
| Mitochondria                                      | 0.0000   | 0.0000   | 0.0000   | 0.0000  | 0.0000   | 0.0000   | 0.0000   | 0.0000   | 0.0000 | 0.0000   | NA     | NA     |

|                                        |        |        |        |        |        |        |        |        |        |        |    |    |
|----------------------------------------|--------|--------|--------|--------|--------|--------|--------|--------|--------|--------|----|----|
| <i>NS9 marine group</i>                | 0.0000 | 0.0000 | 0.0000 | 0.0000 | 0.0000 | 0.0000 | 0.0000 | 0.0000 | 0.0000 | 0.0000 | NA | NA |
| <i>PeH15</i>                           | 0.0000 | 0.0000 | 0.0000 | 0.0000 | 0.0000 | 0.0000 | 0.0000 | 0.0000 | 0.0000 | 0.0000 | NA | NA |
| <i>Phoenix dactylifera</i> (date palm) | 0.0000 | 0.0000 | 0.0000 | 0.0000 | 0.0000 | 0.0000 | 0.0000 | 0.0000 | 0.0000 | 0.0000 | NA | NA |
| <i>Portulaca oleracea</i>              | 0.0000 | 0.0000 | 0.0000 | 0.0000 | 0.0000 | 0.0000 | 0.0000 | 0.0000 | 0.0000 | 0.0000 | NA | NA |
| <i>Rhodobiaceae</i>                    | 0.0000 | 0.0000 | 0.0000 | 0.0000 | 0.0000 | 0.0000 | 0.0000 | 0.0000 | 0.0000 | 0.0000 | NA | NA |
| <i>Spirochaetaceae</i>                 | 0.0000 | 0.0000 | 0.0000 | 0.0000 | 0.0000 | 0.0000 | 0.0000 | 0.0000 | 0.0000 | 0.0000 | NA | NA |
| <i>Synergistaceae</i>                  | 0.0000 | 0.0000 | 0.0000 | 0.0000 | 0.0000 | 0.0000 | 0.0000 | 0.0000 | 0.0000 | 0.0000 | NA | NA |
| <i>Syngonanthus chrysanthus</i>        | 0.0000 | 0.0000 | 0.0000 | 0.0000 | 0.0000 | 0.0000 | 0.0000 | 0.0000 | 0.0000 | 0.0000 | NA | NA |
| <i>Uncultured bacterium-01</i>         | 0.0000 | 0.0000 | 0.0000 | 0.0000 | 0.0000 | 0.0000 | 0.0000 | 0.0000 | 0.0000 | 0.0000 | NA | NA |
| <i>Uncultured bacterium-03</i>         | 0.0000 | 0.0000 | 0.0000 | 0.0000 | 0.0000 | 0.0000 | 0.0000 | 0.0000 | 0.0000 | 0.0000 | NA | NA |
| <i>Uncultured bacterium-10</i>         | 0.0000 | 0.0000 | 0.0000 | 0.0000 | 0.0000 | 0.0000 | 0.0000 | 0.0000 | 0.0000 | 0.0000 | NA | NA |
| <i>Uncultured organism-01</i>          | 0.0000 | 0.0000 | 0.0000 | 0.0000 | 0.0000 | 0.0000 | 0.0000 | 0.0000 | 0.0000 | 0.0000 | NA | NA |
| <i>Uncultured rumen bacterium</i>      | 0.0000 | 0.0000 | 0.0000 | 0.0000 | 0.0000 | 0.0000 | 0.0000 | 0.0000 | 0.0000 | 0.0000 | NA | NA |

SD—standard deviation; NA—not available; *p*-value—calculated with the non-parametric Mann–Whitney test; *p*-adj.—*p* values adjusted with Benjamini–Hochberg FDR for multiple comparisons; red font—statistically significant results ( $p < 0.05$ ).

**Table S5.** The percentage abundance of the intestinal microbiota in the study group of COVID-19 patients and healthy controls at the genus level.

| Genus                                 | COVID-19 patients, <i>n</i> = 8 |         |         |         |          | Controls, <i>n</i> = 14 |         |         |        |          | <i>p</i> - value | <i>p</i> - adj. |
|---------------------------------------|---------------------------------|---------|---------|---------|----------|-------------------------|---------|---------|--------|----------|------------------|-----------------|
|                                       | Mean                            | Median  | SD      | Min.    | Max.     | Mean                    | Median  | SD      | Min.   | Max.     |                  |                 |
| <i>Akkermansia</i>                    | 0.7316                          | 0.1971  | 10.3831 | 0.0251  | 40.1029  | 0.0238                  | 0.0160  | 0.0286  | 0.0000 | 0.0923   | 0.0017           | 0.3093          |
| <i>Neisseria</i>                      | 0.0136                          | 0.0037  | 0.0292  | 0.0000  | 0.0854   | 0.0010                  | 0.0000  | 0.0039  | 0.0000 | 0.0144   | 0.0117           | 0.6507          |
| <i>Bifilophila</i>                    | 0.0215                          | 0.0125  | 0.0275  | 0.0000  | 0.0838   | 0.0044                  | 0.0000  | 0.0089  | 0.0000 | 0.0251   | 0.0178           | 0.6507          |
| <i>Adlercreutzia</i>                  | 0.0029                          | 0.0000  | 0.0050  | 0.0000  | 0.0143   | 0.0000                  | 0.0000  | 0.0000  | 0.0000 | 0.0000   | 0.0191           | 0.6507          |
| <i>Blautia</i>                        | 80.5187                         | 70.9408 | 50.2602 | 10.7165 | 160.9819 | 40.2086                 | 30.4824 | 20.6461 | 0.2433 | 80.8204  | 0.0518           | 0.6507          |
| <i>Enterorhabdus</i>                  | 0.0187                          | 0.0060  | 0.0389  | 0.0000  | 0.1139   | 0.0017                  | 0.0000  | 0.0038  | 0.0000 | 0.0125   | 0.0574           | 0.6507          |
| <i>Epulopiscium</i>                   | 0.2171                          | 0.2214  | 0.1755  | 0.0179  | 0.5076   | 0.0951                  | 0.0484  | 0.1149  | 0.0000 | 0.3754   | 0.0602           | 0.6507          |
| <i>Anaerostipes</i>                   | 10.9278                         | 20.0260 | 10.3330 | 0.1718  | 30.3236  | 0.9981                  | 0.6294  | 0.9267  | 0.0543 | 20.9183  | 0.0605           | 0.6507          |
| <i>Gordonibacter</i>                  | 0.0008                          | 0.0000  | 0.0016  | 0.0000  | 0.0041   | 0.0000                  | 0.0000  | 0.0000  | 0.0000 | 0.0000   | 0.0648           | 0.6507          |
| <i>Leuconostoc</i>                    | 0.0035                          | 0.0000  | 0.0085  | 0.0000  | 0.0244   | 0.0000                  | 0.0000  | 0.0000  | 0.0000 | 0.0000   | 0.0648           | 0.6507          |
| <i>Marcovinbryantia</i>               | 0.0009                          | 0.0000  | 0.0017  | 0.0000  | 0.0041   | 0.0000                  | 0.0000  | 0.0000  | 0.0000 | 0.0000   | 0.0648           | 0.6507          |
| <i>Phyllobacterium</i>                | 0.0054                          | 0.0000  | 0.0128  | 0.0000  | 0.0366   | 0.0000                  | 0.0000  | 0.0000  | 0.0000 | 0.0000   | 0.0648           | 0.6507          |
| Uncultured Bacillales bacterium       | 0.0097                          | 0.0000  | 0.0189  | 0.0000  | 0.0494   | 0.0000                  | 0.0000  | 0.0000  | 0.0000 | 0.0000   | 0.0648           | 0.6507          |
| Uncultured bacterium-17               | 0.0107                          | 0.0000  | 0.0202  | 0.0000  | 0.0494   | 0.0000                  | 0.0000  | 0.0000  | 0.0000 | 0.0000   | 0.0648           | 0.6507          |
| {Unknown Family} Bacteroidales        | 0.0016                          | 0.0000  | 0.0037  | 0.0000  | 0.0106   | 0.0000                  | 0.0000  | 0.0000  | 0.0000 | 0.0000   | 0.0648           | 0.6507          |
| {Unknown Phylum} Bacteria             | 0.0014                          | 0.0000  | 0.0029  | 0.0000  | 0.0078   | 0.0000                  | 0.0000  | 0.0000  | 0.0000 | 0.0000   | 0.0648           | 0.6507          |
| Incertae Sedis-05                     | 0.3064                          | 0.0301  | 0.5335  | 0.0035  | 10.2988  | 0.6742                  | 0.3148  | 10.0278 | 0.0038 | 30.7574  | 0.0705           | 0.6507          |
| <i>Kordiimonas</i>                    | 0.0952                          | 0.0000  | 0.1863  | 0.0000  | 0.4976   | 0.0096                  | 0.0000  | 0.0358  | 0.0000 | 0.1338   | 0.0847           | 0.6507          |
| <i>Turcibacter</i>                    | 0.1523                          | 0.1137  | 0.1641  | 0.0000  | 0.4580   | 0.2521                  | 0.0081  | 0.8683  | 0.0000 | 30.2669  | 0.0893           | 0.6507          |
| Uncultured-01                         | 0.0645                          | 0.0326  | 0.0845  | 0.0000  | 0.2466   | 0.0150                  | 0.0000  | 0.0232  | 0.0000 | 0.0748   | 0.0921           | 0.6507          |
| <i>Hymenobacter</i>                   | 0.1470                          | 0.1841  | 0.0932  | 0.0143  | 0.2621   | 0.0888                  | 0.0314  | 0.1356  | 0.0000 | 0.3998   | 0.1083           | 0.6507          |
| <i>Megasphaera</i>                    | 0.0000                          | 0.0000  | 0.0000  | 0.0000  | 0.0000   | 0.0195                  | 0.0000  | 0.0490  | 0.0000 | 0.1676   | 0.1159           | 0.6507          |
| Incertae Sedis-06                     | 0.5949                          | 0.4226  | 0.7282  | 0.0785  | 20.3636  | 0.3076                  | 0.2367  | 0.2626  | 0.0197 | 0.9136   | 0.1246           | 0.6507          |
| <i>Streptococcus</i>                  | 0.5465                          | 0.1254  | 10.1714 | 0.0064  | 30.4273  | 0.0512                  | 0.0312  | 0.0653  | 0.0000 | 0.2346   | 0.1246           | 0.6507          |
| <i>Megamonas</i>                      | 0.0051                          | 0.0000  | 0.0092  | 0.0000  | 0.0251   | 0.0136                  | 0.0000  | 0.0511  | 0.0000 | 0.1910   | 0.1282           | 0.6507          |
| <i>Quinella</i>                       | 0.0281                          | 0.0000  | 0.0747  | 0.0000  | 0.2127   | 0.0160                  | 0.0000  | 0.0599  | 0.0000 | 0.2243   | 0.1282           | 0.6507          |
| <i>Phascolarctobacterium</i>          | 0.0973                          | 0.0140  | 0.1325  | 0.0000  | 0.3084   | 0.0482                  | 0.0000  | 0.1086  | 0.0000 | 0.3486   | 0.1286           | 0.6507          |
| Uncultured-03                         | 0.0232                          | 0.0000  | 0.0632  | 0.0000  | 0.1795   | 30.4522                 | 0.0154  | 70.7409 | 0.0000 | 220.2001 | 0.1354           | 0.6507          |
| <i>Propionibacterium</i>              | 0.0173                          | 0.0000  | 0.0315  | 0.0000  | 0.0841   | 0.0019                  | 0.0000  | 0.0058  | 0.0000 | 0.0217   | 0.1778           | 0.6507          |
| <i>Flavonifractor</i>                 | 0.0096                          | 0.0028  | 0.0161  | 0.0000  | 0.0468   | 0.0042                  | 0.0000  | 0.0097  | 0.0000 | 0.0344   | 0.1802           | 0.6507          |
| Uncultured bacterium-05               | 0.3792                          | 0.2049  | 0.4976  | 0.0107  | 10.5312  | 0.1956                  | 0.0473  | 0.2737  | 0.0000 | 0.8772   | 0.1820           | 0.6507          |
| <i>Clostridium sensu stricto</i> 1    | 0.4751                          | 0.3941  | 0.4250  | 0.0143  | 10.3289  | 0.2884                  | 0.1021  | 0.4319  | 0.0119 | 10.3609  | 0.1832           | 0.6507          |
| <i>Acidaminococcus</i>                | 0.0000                          | 0.0000  | 0.0000  | 0.0000  | 0.0000   | 0.0361                  | 0.0000  | 0.1015  | 0.0000 | 0.3732   | 0.1885           | 0.6507          |
| <i>Butyrivibrio</i>                   | 0.0000                          | 0.0000  | 0.0000  | 0.0000  | 0.0000   | 0.0938                  | 0.0000  | 0.3057  | 0.0000 | 10.1468  | 0.1885           | 0.6507          |
| <i>Campylobacter</i>                  | 0.0000                          | 0.0000  | 0.0000  | 0.0000  | 0.0000   | 0.2294                  | 0.0000  | 0.8275  | 0.0000 | 30.1036  | 0.1885           | 0.6507          |
| <i>Intestinimonas</i>                 | 0.0000                          | 0.0000  | 0.0000  | 0.0000  | 0.0000   | 0.0025                  | 0.0000  | 0.0053  | 0.0000 | 0.0166   | 0.1885           | 0.6507          |
| <i>Paraprevotella</i>                 | 0.4089                          | 0.0216  | 0.9655  | 0.0000  | 20.7796  | 0.1011                  | 0.0000  | 0.3611  | 0.0000 | 10.3552  | 0.1914           | 0.6507          |
| <i>Roseburia</i>                      | 30.1997                         | 30.3612 | 10.3374 | 10.5369 | 40.8095  | 20.3465                 | 20.0347 | 10.8365 | 0.0000 | 60.7251  | 0.2067           | 0.6507          |
| Uncultured-02                         | 10.0196                         | 10.0823 | 0.5698  | 0.0797  | 10.6723  | 0.7509                  | 0.4706  | 0.8545  | 0.0000 | 20.6009  | 0.2067           | 0.6507          |
| Uncultured-14                         | 0.6336                          | 0.6336  | 0.4609  | 0.0924  | 10.4292  | 0.3819                  | 0.4188  | 0.2743  | 0.0000 | 0.7725   | 0.2067           | 0.6507          |
| <i>Actinomyces</i>                    | 0.0015                          | 0.0000  | 0.0042  | 0.0000  | 0.0118   | 0.0000                  | 0.0000  | 0.0000  | 0.0000 | 0.0000   | 0.2193           | 0.6507          |
| <i>Arcanobacterium</i>                | 0.0010                          | 0.0000  | 0.0028  | 0.0000  | 0.0078   | 0.0000                  | 0.0000  | 0.0000  | 0.0000 | 0.0000   | 0.2193           | 0.6507          |
| <i>Cetobacterium</i>                  | 0.0004                          | 0.0000  | 0.0011  | 0.0000  | 0.0032   | 0.0000                  | 0.0000  | 0.0000  | 0.0000 | 0.0000   | 0.2193           | 0.6507          |
| <i>Fructobacillus</i>                 | 0.0005                          | 0.0000  | 0.0014  | 0.0000  | 0.0041   | 0.0000                  | 0.0000  | 0.0000  | 0.0000 | 0.0000   | 0.2193           | 0.6507          |
| <i>Gelria</i>                         | 0.0003                          | 0.0000  | 0.0009  | 0.0000  | 0.0025   | 0.0000                  | 0.0000  | 0.0000  | 0.0000 | 0.0000   | 0.2193           | 0.6507          |
| <i>Ignavigranum</i>                   | 0.0006                          | 0.0000  | 0.0017  | 0.0000  | 0.0049   | 0.0000                  | 0.0000  | 0.0000  | 0.0000 | 0.0000   | 0.2193           | 0.6507          |
| <i>Paludibacter</i>                   | 0.0003                          | 0.0000  | 0.0008  | 0.0000  | 0.0024   | 0.0000                  | 0.0000  | 0.0000  | 0.0000 | 0.0000   | 0.2193           | 0.6507          |
| <i>Rhodococcus</i>                    | 0.0040                          | 0.0000  | 0.0113  | 0.0000  | 0.0319   | 0.0000                  | 0.0000  | 0.0000  | 0.0000 | 0.0000   | 0.2193           | 0.6507          |
| <i>Selenomonas</i>                    | 0.0004                          | 0.0000  | 0.0011  | 0.0000  | 0.0032   | 0.0000                  | 0.0000  | 0.0000  | 0.0000 | 0.0000   | 0.2193           | 0.6507          |
| <i>Trueperella</i>                    | 0.0005                          | 0.0000  | 0.0014  | 0.0000  | 0.0039   | 0.0000                  | 0.0000  | 0.0000  | 0.0000 | 0.0000   | 0.2193           | 0.6507          |
| Uncultured Bacteroidetes bacterium-01 | 0.0009                          | 0.0000  | 0.0025  | 0.0000  | 0.0071   | 0.0000                  | 0.0000  | 0.0000  | 0.0000 | 0.0000   | 0.2193           | 0.6507          |
| Uncultured Firmicutes bacterium       | 0.0018                          | 0.0000  | 0.0050  | 0.0000  | 0.0141   | 0.0000                  | 0.0000  | 0.0000  | 0.0000 | 0.0000   | 0.2193           | 0.6507          |



|                                  |          |         |         |         |          |         |         |         |         |          |        |        |
|----------------------------------|----------|---------|---------|---------|----------|---------|---------|---------|---------|----------|--------|--------|
| Uncultured bacterium-08          | 0.0006   | 0.0000  | 0.0017  | 0.0000  | 0.0049   | 0.0000  | 0.0000  | 0.0000  | 0.0000  | 0.0000   | 0.2193 | 0.6507 |
| Uncultured bacterium-09          | 0.0054   | 0.0000  | 0.0152  | 0.0000  | 0.0430   | 0.0000  | 0.0000  | 0.0000  | 0.0000  | 0.0000   | 0.2193 | 0.6507 |
| Uncultured bacterium-21          | 0.0031   | 0.0000  | 0.0089  | 0.0000  | 0.0251   | 0.0000  | 0.0000  | 0.0000  | 0.0000  | 0.0000   | 0.2193 | 0.6507 |
| Uncultured rumen bacterium-01    | 0.0190   | 0.0000  | 0.0538  | 0.0000  | 0.1521   | 0.0000  | 0.0000  | 0.0000  | 0.0000  | 0.0000   | 0.2193 | 0.6507 |
| Uncultured-04                    | 0.0004   | 0.0000  | 0.0012  | 0.0000  | 0.0035   | 0.0000  | 0.0000  | 0.0000  | 0.0000  | 0.0000   | 0.2193 | 0.6507 |
| Uncultured-11                    | 0.0009   | 0.0000  | 0.0025  | 0.0000  | 0.0071   | 0.0000  | 0.0000  | 0.0000  | 0.0000  | 0.0000   | 0.2193 | 0.6507 |
| Unidentified                     | 0.0004   | 0.0000  | 0.0012  | 0.0000  | 0.0035   | 0.0000  | 0.0000  | 0.0000  | 0.0000  | 0.0000   | 0.2193 | 0.6507 |
| {Unknown Class} Bacteroidetes    | 0.0014   | 0.0000  | 0.0039  | 0.0000  | 0.0111   | 0.0000  | 0.0000  | 0.0000  | 0.0000  | 0.0000   | 0.2193 | 0.6507 |
| {Unknown Genus} Puniceicoccaceae | 0.0031   | 0.0000  | 0.0089  | 0.0000  | 0.0251   | 0.0000  | 0.0000  | 0.0000  | 0.0000  | 0.0000   | 0.2193 | 0.6507 |
| Eggerthella                      | 0.0032   | 0.0000  | 0.0066  | 0.0000  | 0.0183   | 0.0003  | 0.0000  | 0.0010  | 0.0000  | 0.0038   | 0.2299 | 0.6570 |
| Uncultured organism-05           | 0.0058   | 0.0000  | 0.0114  | 0.0000  | 0.0304   | 0.0006  | 0.0000  | 0.0022  | 0.0000  | 0.0080   | 0.2299 | 0.6570 |
| Faecalibacterium                 | 50.8263  | 30.2673 | 50.0413 | 0.4675  | 130.2204 | 80.0863 | 60.6540 | 50.8374 | 0.0103  | 190.9471 | 0.2323 | 0.6570 |
| Parasutterella                   | 0.0450   | 0.0097  | 0.0817  | 0.0000  | 0.2416   | 0.4396  | 0.0000  | 10.3889 | 0.0000  | 50.2236  | 0.2480 | 0.6900 |
| Collinsella                      | 0.3948   | 0.2274  | 0.3823  | 0.0537  | 10.0049  | 0.7230  | 0.3194  | 0.8757  | 0.0000  | 30.1648  | 0.2601 | 0.6900 |
| Allisonella                      | 0.0186   | 0.0000  | 0.0352  | 0.0000  | 0.0943   | 0.0089  | 0.0000  | 0.0304  | 0.0000  | 0.1142   | 0.2851 | 0.6900 |
| Sarcina                          | 0.0166   | 0.0000  | 0.0429  | 0.0000  | 0.1226   | 0.0020  | 0.0000  | 0.0051  | 0.0000  | 0.0150   | 0.2851 | 0.6900 |
| Lachnospira                      | 0.1477   | 0.0779  | 0.1980  | 0.0073  | 0.6050   | 0.2000  | 0.0115  | 0.3851  | 0.0000  | 10.1634  | 0.2887 | 0.6900 |
| Prevotella                       | 0.3772   | 0.2911  | 0.3969  | 0.0000  | 10.2214  | 10.5949 | 10.2171 | 20.0188 | 0.0000  | 70.3474  | 0.2896 | 0.6900 |
| Uncultured-12                    | 0.9595   | 0.1061  | 20.2829 | 0.0035  | 60.5892  | 0.7679  | 0.2340  | 10.3821 | 0.0000  | 50.1710  | 0.2900 | 0.6900 |
| Thalassospira                    | 0.7103   | 0.2362  | 0.9180  | 0.0000  | 20.5166  | 10.1767 | 0.0058  | 20.1791 | 0.0000  | 60.3184  | 0.2942 | 0.6900 |
| Acetitomaculum                   | 0.0000   | 0.0000  | 0.0000  | 0.0000  | 0.0000   | 0.0017  | 0.0000  | 0.0053  | 0.0000  | 0.0198   | 0.3050 | 0.6900 |
| Acinetobacter                    | 0.0000   | 0.0000  | 0.0000  | 0.0000  | 0.0000   | 0.0011  | 0.0000  | 0.0028  | 0.0000  | 0.0080   | 0.3050 | 0.6900 |
| Bacillus                         | 0.0000   | 0.0000  | 0.0000  | 0.0000  | 0.0000   | 0.0134  | 0.0000  | 0.0343  | 0.0000  | 0.1047   | 0.3050 | 0.6900 |
| Citrobacter                      | 0.0000   | 0.0000  | 0.0000  | 0.0000  | 0.0000   | 10.4287 | 0.0000  | 50.3446 | 0.0000  | 190.9980 | 0.3050 | 0.6900 |
| Sporosarcina                     | 0.0000   | 0.0000  | 0.0000  | 0.0000  | 0.0000   | 0.1605  | 0.0000  | 0.5971  | 0.0000  | 20.2351  | 0.3050 | 0.6900 |
| Uncultured bacterium-13          | 0.0000   | 0.0000  | 0.0000  | 0.0000  | 0.0000   | 0.0007  | 0.0000  | 0.0017  | 0.0000  | 0.0052   | 0.3050 | 0.6900 |
| Uncultured organism-02           | 0.0000   | 0.0000  | 0.0000  | 0.0000  | 0.0000   | 0.0022  | 0.0000  | 0.0058  | 0.0000  | 0.0192   | 0.3050 | 0.6900 |
| Uncultured sediment bacterium    | 0.0000   | 0.0000  | 0.0000  | 0.0000  | 0.0000   | 0.0006  | 0.0000  | 0.0014  | 0.0000  | 0.0040   | 0.3050 | 0.6900 |
| Dialister                        | 0.1817   | 0.0947  | 0.2124  | 0.0000  | 0.5516   | 0.1116  | 0.0141  | 0.2241  | 0.0000  | 0.8310   | 0.3106 | 0.6940 |
| Incertae Sedis-07                | 0.3284   | 0.0770  | 0.4724  | 0.0000  | 10.2774  | 0.1643  | 0.0078  | 0.3693  | 0.0000  | 10.3621  | 0.3146 | 0.6943 |
| Dorea                            | 0.5130   | 0.4244  | 0.4152  | 0.0251  | 10.3553  | 0.4172  | 0.1297  | 0.5733  | 0.0241  | 10.8990  | 0.3223 | 0.6968 |
| Alloprevotella                   | 0.0007   | 0.0000  | 0.0020  | 0.0000  | 0.0056   | 0.6116  | 0.0000  | 10.6893 | 0.0000  | 60.3646  | 0.3291 | 0.6968 |
| Pantoea                          | 0.0079   | 0.0000  | 0.0154  | 0.0000  | 0.0407   | 0.9089  | 0.0000  | 30.4008 | 0.0000  | 120.7247 | 0.3311 | 0.6968 |
| {Unknown Class} Firmicutes       | 0.0009   | 0.0000  | 0.0016  | 0.0000  | 0.0036   | 0.0003  | 0.0000  | 0.0011  | 0.0000  | 0.0043   | 0.3311 | 0.6968 |
| Desulfovibrio                    | 0.0056   | 0.0000  | 0.0158  | 0.0000  | 0.0448   | 0.0150  | 0.0000  | 0.0377  | 0.0000  | 0.1412   | 0.3388 | 0.7048 |
| Butyrlicimonas                   | 0.0128   | 0.0107  | 0.0095  | 0.0000  | 0.0251   | 0.0644  | 0.0239  | 0.1042  | 0.0000  | 0.3957   | 0.3541 | 0.7097 |
| Incertae Sedis-04                | 110.3662 | 10.5632 | 50.3767 | 30.6263 | 170.9951 | 10.0430 | 80.0470 | 60.9700 | 30.7396 | 30.4944  | 0.3936 | 0.7097 |
| Moryella                         | 0.0062   | 0.0000  | 0.0126  | 0.0000  | 0.0366   | 0.0468  | 0.0049  | 0.1465  | 0.0000  | 0.5547   | 0.4123 | 0.7097 |
| Alistipes                        | 10.0468  | 10.0355 | 0.7772  | 0.1596  | 20.5915  | 20.5779 | 10.3893 | 30.4270 | 0.0152  | 120.0497 | 0.4325 | 0.7097 |
| Uncultured bacterium-02          | 0.2501   | 0.1299  | 0.2220  | 0.0366  | 0.6101   | 0.2418  | 0.0549  | 0.2731  | 0.0098  | 0.8638   | 0.4325 | 0.7097 |
| Anaerotruncus                    | 0.1773   | 0.1132  | 0.2061  | 0.0000  | 0.5711   | 0.2332  | 0.0038  | 0.4597  | 0.0000  | 10.4581  | 0.4579 | 0.7097 |
| Bifidobacterium                  | 0.7704   | 0.1967  | 10.1728 | 0.0000  | 30.0244  | 10.2798 | 0.6692  | 10.4487 | 0.0038  | 40.1488  | 0.4736 | 0.7097 |
| Uncultured-09                    | 0.0267   | 0.0184  | 0.0320  | 0.0000  | 0.0980   | 0.0312  | 0.0094  | 0.0553  | 0.0000  | 0.2051   | 0.4906 | 0.7097 |
| Halocella                        | 0.0724   | 0.0018  | 0.1948  | 0.0000  | 0.5542   | 0.0120  | 0.0000  | 0.0258  | 0.0000  | 0.0815   | 0.5009 | 0.7097 |
| Anaerosporeobacter               | 0.0000   | 0.0000  | 0.0000  | 0.0000  | 0.0000   | 0.0003  | 0.0000  | 0.0010  | 0.0000  | 0.0038   | 0.5083 | 0.7097 |
| Candidatus Methanomethylophilus  | 0.0000   | 0.0000  | 0.0000  | 0.0000  | 0.0000   | 0.0003  | 0.0000  | 0.0011  | 0.0000  | 0.0040   | 0.5083 | 0.7097 |
| Carnobacterium                   | 0.0000   | 0.0000  | 0.0000  | 0.0000  | 0.0000   | 0.0003  | 0.0000  | 0.0010  | 0.0000  | 0.0038   | 0.5083 | 0.7097 |
| Cerasibacillus                   | 0.0000   | 0.0000  | 0.0000  | 0.0000  | 0.0000   | 0.0005  | 0.0000  | 0.0020  | 0.0000  | 0.0077   | 0.5083 | 0.7097 |
| Dialister sp. oral taxon 502     | 0.0000   | 0.0000  | 0.0000  | 0.0000  | 0.0000   | 0.0008  | 0.0000  | 0.0030  | 0.0000  | 0.0112   | 0.5083 | 0.7097 |
| Ferritrophicum                   | 0.0000   | 0.0000  | 0.0000  | 0.0000  | 0.0000   | 0.0011  | 0.0000  | 0.0041  | 0.0000  | 0.0153   | 0.5083 | 0.7097 |
| Fusobacterium                    | 0.0000   | 0.0000  | 0.0000  | 0.0000  | 0.0000   | 0.0005  | 0.0000  | 0.0020  | 0.0000  | 0.0076   | 0.5083 | 0.7097 |
| Holdemania                       | 0.0000   | 0.0000  | 0.0000  | 0.0000  | 0.0000   | 0.0004  | 0.0000  | 0.0014  | 0.0000  | 0.0052   | 0.5083 | 0.7097 |
| Howardella                       | 0.0000   | 0.0000  | 0.0000  | 0.0000  | 0.0000   | 0.0003  | 0.0000  | 0.0010  | 0.0000  | 0.0038   | 0.5083 | 0.7097 |
| Incertae Sedis-01                | 0.0000   | 0.0000  | 0.0000  | 0.0000  | 0.0000   | 0.0003  | 0.0000  | 0.0011  | 0.0000  | 0.0040   | 0.5083 | 0.7097 |
| Marine group                     | 0.0000   | 0.0000  | 0.0000  | 0.0000  | 0.0000   | 0.0003  | 0.0000  | 0.0010  | 0.0000  | 0.0038   | 0.5083 | 0.7097 |
| Methanobrevibacter               | 0.0000   | 0.0000  | 0.0000  | 0.0000  | 0.0000   | 0.0009  | 0.0000  | 0.0034  | 0.0000  | 0.0125   | 0.5083 | 0.7097 |

|                                                    |         |          |          |         |          |          |          |          |         |          |        |        |
|----------------------------------------------------|---------|----------|----------|---------|----------|----------|----------|----------|---------|----------|--------|--------|
| <i>Methanospaera</i>                               | 0.0000  | 0.0000   | 0.0000   | 0.0000  | 0.0000   | 0.0009   | 0.0000   | 0.0034   | 0.0000  | 0.0125   | 0.5083 | 0.7097 |
| <i>Methylobacterium</i>                            | 0.0000  | 0.0000   | 0.0000   | 0.0000  | 0.0000   | 0.0005   | 0.0000   | 0.0020   | 0.0000  | 0.0076   | 0.5083 | 0.7097 |
| <i>Mitsuokella</i>                                 | 0.0000  | 0.0000   | 0.0000   | 0.0000  | 0.0000   | 0.0003   | 0.0000   | 0.0011   | 0.0000  | 0.0040   | 0.5083 | 0.7097 |
| <i>Mucilaginibacter</i>                            | 0.0000  | 0.0000   | 0.0000   | 0.0000  | 0.0000   | 0.0005   | 0.0000   | 0.0020   | 0.0000  | 0.0076   | 0.5083 | 0.7097 |
| <i>Nitrospira</i>                                  | 0.0000  | 0.0000   | 0.0000   | 0.0000  | 0.0000   | 0.0005   | 0.0000   | 0.0020   | 0.0000  | 0.0076   | 0.5083 | 0.7097 |
| <i>Oceanobacillus</i>                              | 0.0000  | 0.0000   | 0.0000   | 0.0000  | 0.0000   | 0.0016   | 0.0000   | 0.0061   | 0.0000  | 0.0230   | 0.5083 | 0.7097 |
| <i>Oxalobacter</i>                                 | 0.0000  | 0.0000   | 0.0000   | 0.0000  | 0.0000   | 0.0003   | 0.0000   | 0.0011   | 0.0000  | 0.0040   | 0.5083 | 0.7097 |
| <i>Paenibacillus</i>                               | 0.0000  | 0.0000   | 0.0000   | 0.0000  | 0.0000   | 0.0027   | 0.0000   | 0.0102   | 0.0000  | 0.0383   | 0.5083 | 0.7097 |
| <i>Parvimonas</i>                                  | 0.0000  | 0.0000   | 0.0000   | 0.0000  | 0.0000   | 0.0005   | 0.0000   | 0.0019   | 0.0000  | 0.0072   | 0.5083 | 0.7097 |
| <i>Pediococcus</i>                                 | 0.0000  | 0.0000   | 0.0000   | 0.0000  | 0.0000   | 0.0011   | 0.0000   | 0.0041   | 0.0000  | 0.0155   | 0.5083 | 0.7097 |
| <i>Pedobacter</i>                                  | 0.0000  | 0.0000   | 0.0000   | 0.0000  | 0.0000   | 0.0005   | 0.0000   | 0.0020   | 0.0000  | 0.0076   | 0.5083 | 0.7097 |
| <i>Pseudomonas</i>                                 | 0.0000  | 0.0000   | 0.0000   | 0.0000  | 0.0000   | 0.8134   | 0.0000   | 30.0436  | 0.0000  | 110.3882 | 0.5083 | 0.7097 |
| <i>Solobacterium</i>                               | 0.0000  | 0.0000   | 0.0000   | 0.0000  | 0.0000   | 0.0233   | 0.0000   | 0.0871   | 0.0000  | 0.3259   | 0.5083 | 0.7097 |
| <i>Sphingomonas</i>                                | 0.0000  | 0.0000   | 0.0000   | 0.0000  | 0.0000   | 0.0005   | 0.0000   | 0.0020   | 0.0000  | 0.0076   | 0.5083 | 0.7097 |
| <i>Uncultured bacterium-03</i>                     | 0.0000  | 0.0000   | 0.0000   | 0.0000  | 0.0000   | 0.0046   | 0.0000   | 0.0171   | 0.0000  | 0.0642   | 0.5083 | 0.7097 |
| <i>Uncultured bacterium-18</i>                     | 0.0000  | 0.0000   | 0.0000   | 0.0000  | 0.0000   | 0.0003   | 0.0000   | 0.0011   | 0.0000  | 0.0043   | 0.5083 | 0.7097 |
| <i>Uncultured bacterium-19</i>                     | 0.0000  | 0.0000   | 0.0000   | 0.0000  | 0.0000   | 0.0061   | 0.0000   | 0.0227   | 0.0000  | 0.0851   | 0.5083 | 0.7097 |
| <i>Uncultured-05</i>                               | 0.0000  | 0.0000   | 0.0000   | 0.0000  | 0.0000   | 0.0050   | 0.0000   | 0.0186   | 0.0000  | 0.0697   | 0.5083 | 0.7097 |
| <i>Uncultured-06</i>                               | 0.0000  | 0.0000   | 0.0000   | 0.0000  | 0.0000   | 0.0136   | 0.0000   | 0.0507   | 0.0000  | 0.1898   | 0.5083 | 0.7097 |
| <i>Uncultured-15</i>                               | 0.0000  | 0.0000   | 0.0000   | 0.0000  | 0.0000   | 0.0028   | 0.0000   | 0.0106   | 0.0000  | 0.0396   | 0.5083 | 0.7097 |
| {Unknown Genus}<br><i>Peptostreptococcaceae</i>    | 0.0000  | 0.0000   | 0.0000   | 0.0000  | 0.0000   | 0.0009   | 0.0000   | 0.0034   | 0.0000  | 0.0125   | 0.5083 | 0.7097 |
| <i>Uncultured bacterium-07</i>                     | 0.0443  | 0.0000   | 0.0866   | 0.0000  | 0.2291   | 0.0142   | 0.0000   | 0.0458   | 0.0000  | 0.1711   | 0.5097 | 0.7097 |
| <i>Coprobacter</i>                                 | 0.0195  | 0.0028   | 0.0335   | 0.0000  | 0.0874   | 0.0295   | 0.0143   | 0.0436   | 0.0000  | 0.1464   | 0.5424 | 0.7317 |
| <i>Edwardsiella</i>                                | 0.0319  | 0.0000   | 0.0876   | 0.0000  | 0.2486   | 0.0097   | 0.0000   | 0.0309   | 0.0000  | 0.1161   | 0.5427 | 0.7317 |
| <i>RC9 gut group</i>                               | 0.0020  | 0.0000   | 0.0058   | 0.0000  | 0.0163   | 0.0121   | 0.0000   | 0.0252   | 0.0000  | 0.0704   | 0.5428 | 0.7317 |
| <i>Slackia</i>                                     | 0.0008  | 0.0000   | 0.0023   | 0.0000  | 0.0064   | 0.0493   | 0.0000   | 0.1771   | 0.0000  | 0.6645   | 0.5428 | 0.7317 |
| <i>Haemophilus</i>                                 | 0.0087  | 0.0000   | 0.0247   | 0.0000  | 0.0698   | 0.0028   | 0.0000   | 0.0052   | 0.0000  | 0.0158   | 0.5458 | 0.7317 |
| <i>Uncultured-08</i>                               | 0.0346  | 0.0249   | 0.0253   | 0.0056  | 0.0758   | 0.0249   | 0.0269   | 0.0247   | 0.0000  | 0.0774   | 0.5607 | 0.7462 |
| <i>Incertae Sedis-03</i>                           | 0.0015  | 0.0000   | 0.0029   | 0.0000  | 0.0075   | 0.0029   | 0.0000   | 0.0096   | 0.0000  | 0.0361   | 0.5770 | 0.7567 |
| <i>Victivallis</i>                                 | 0.0121  | 0.0000   | 0.0328   | 0.0000  | 0.0931   | 0.0019   | 0.0000   | 0.0050   | 0.0000  | 0.0153   | 0.5770 | 0.7567 |
| <i>Catenibacterium</i>                             | 0.0140  | 0.0000   | 0.0373   | 0.0000  | 0.1060   | 0.9629   | 0.0000   | 20.6796  | 0.0000  | 90.5507  | 0.5916 | 0.7704 |
| {Unknown Genus}<br><i>Lachnospiraceae</i>          | 0.0164  | 0.0000   | 0.0427   | 0.0000  | 0.1220   | 0.0531   | 0.0000   | 0.1732   | 0.0000  | 0.6498   | 0.6018 | 0.7759 |
| <i>Parabacteroides</i>                             | 0.3905  | 0.1903   | 0.4134   | 0.0337  | 10.1862  | 0.3202   | 0.2364   | 0.3182   | 0.0000  | 0.9683   | 0.6086 | 0.7759 |
| <i>Subdoligranulum</i>                             | 10.9020 | 10.3792  | 10.7781  | 0.5367  | 60.0910  | 10.9282  | 10.8287  | 10.2334  | 0.0645  | 30.9354  | 0.6087 | 0.7759 |
| <i>Barnesiella</i>                                 | 20.0559 | 10.7843  | 10.7403  | 0.0112  | 40.3347  | 30.5931  | 20.4177  | 30.7917  | 0.0000  | 10.3173  | 0.6572 | 0.8262 |
| <i>Pseudobutyrvibrio</i>                           | 20.0877 | 10.5076  | 20.1817  | 0.3348  | 70.0758  | 20.8313  | 10.1982  | 40.4030  | 0.0457  | 150.7375 | 0.6573 | 0.8262 |
| <i>Uncultured-16</i>                               | 0.0119  | 0.0000   | 0.0232   | 0.0000  | 0.0610   | 0.0014   | 0.0000   | 0.0029   | 0.0000  | 0.0077   | 0.6758 | 0.8279 |
| <i>Enterococcus</i>                                | 0.0211  | 0.0000   | 0.0597   | 0.0000  | 0.1687   | 0.0005   | 0.0000   | 0.0019   | 0.0000  | 0.0072   | 0.6816 | 0.8279 |
| <i>Morganella</i>                                  | 0.0005  | 0.0000   | 0.0014   | 0.0000  | 0.0041   | 0.0003   | 0.0000   | 0.0010   | 0.0000  | 0.0038   | 0.6816 | 0.8279 |
| <i>Thermoanaerobacterium</i>                       | 0.0146  | 0.0000   | 0.0412   | 0.0000  | 0.1165   | 0.0063   | 0.0000   | 0.0234   | 0.0000  | 0.0876   | 0.6816 | 0.8279 |
| <i>Uncultured Thermoanaerobacterales bacterium</i> | 0.0275  | 0.0000   | 0.0777   | 0.0000  | 0.2199   | 0.0005   | 0.0000   | 0.0019   | 0.0000  | 0.0072   | 0.6816 | 0.8279 |
| <i>Ruminococcus</i>                                | 10.3568 | 50.5903  | 140.4687 | 0.7684  | 440.4808 | 60.0222  | 50.6359  | 50.7028  | 0.1213  | 180.7126 | 0.7074 | 0.8514 |
| <i>Enterobacter</i>                                | 0.3922  | 0.0000   | 10.0958  | 0.0000  | 30.1041  | 0.2165   | 0.0000   | 0.5272   | 0.0000  | 10.7386  | 0.7103 | 0.8514 |
| {Unknown Family}<br><i>Clostridiales</i>           | 0.0015  | 0.0000   | 0.0028   | 0.0000  | 0.0065   | 0.0030   | 0.0000   | 0.0092   | 0.0000  | 0.0342   | 0.7226 | 0.8605 |
| <i>Planomicrobium</i>                              | 0.0191  | 0.0000   | 0.0539   | 0.0000  | 0.1525   | 0.0075   | 0.0000   | 0.0188   | 0.0000  | 0.0684   | 0.7609 | 0.8874 |
| <i>Christensenella</i>                             | 0.0004  | 0.0000   | 0.0011   | 0.0000  | 0.0032   | 0.0006   | 0.0000   | 0.0022   | 0.0000  | 0.0080   | 0.7844 | 0.8874 |
| <i>Klebsiella</i>                                  | 0.0006  | 0.0000   | 0.0017   | 0.0000  | 0.0049   | 0.0010   | 0.0000   | 0.0039   | 0.0000  | 0.0144   | 0.7844 | 0.8874 |
| <i>Mogibacterium</i>                               | 0.0012  | 0.0000   | 0.0035   | 0.0000  | 0.0098   | 0.0059   | 0.0000   | 0.0220   | 0.0000  | 0.0824   | 0.7844 | 0.8874 |
| <i>Peptococcus</i>                                 | 0.0004  | 0.0000   | 0.0011   | 0.0000  | 0.0032   | 0.0003   | 0.0000   | 0.0010   | 0.0000  | 0.0038   | 0.7844 | 0.8874 |
| <i>Uncultured bacterium-16</i>                     | 0.0003  | 0.0000   | 0.0008   | 0.0000  | 0.0024   | 0.0009   | 0.0000   | 0.0034   | 0.0000  | 0.0125   | 0.7844 | 0.8874 |
| <i>Uncultured organism-06</i>                      | 0.0013  | 0.0000   | 0.0037   | 0.0000  | 0.0106   | 0.0095   | 0.0000   | 0.0354   | 0.0000  | 0.1326   | 0.7844 | 0.8874 |
| <i>Uncultured-20</i>                               | 0.0005  | 0.0000   | 0.0014   | 0.0000  | 0.0041   | 0.4491   | 0.0000   | 10.6805  | 0.0000  | 60.2880  | 0.7844 | 0.8874 |
| <i>Bacteroides</i>                                 | 20.7352 | 210.2925 | 140.3156 | 30.0512 | 40.1683  | 190.5739 | 160.7984 | 140.7254 | 0.2653  | 430.1085 | 0.8112 | 0.9063 |
| <i>Uncultured-13</i>                               | 40.1415 | 40.0977  | 20.0309  | 10.5227 | 80.2819  | 50.6699  | 30.4822  | 60.2562  | 0.3825  | 190.2359 | 0.8112 | 0.9063 |
| <i>Dokdonella</i>                                  | 0.0009  | 0.0000   | 0.0025   | 0.0000  | 0.0071   | 0.0165   | 0.0000   | 0.0559   | 0.0000  | 0.2097   | 0.8638 | 0.9483 |
| <i>Veillonella</i>                                 | 0.0004  | 0.0000   | 0.0013   | 0.0000  | 0.0036   | 0.0020   | 0.0000   | 0.0062   | 0.0000  | 0.0231   | 0.8638 | 0.9483 |
| <i>Uncultured-10</i>                               | 70.5201 | 60.0657  | 30.7579  | 30.4010 | 130.7908 | 70.4795  | 70.6785  | 30.1779  | 10.7354 | 110.7428 | 0.8645 | 0.9483 |

[illegible]

|                                                  |        |        |        |        |        |        |        |        |        |        |    |    |
|--------------------------------------------------|--------|--------|--------|--------|--------|--------|--------|--------|--------|--------|----|----|
| <i>Uncultured Bacteroidetes<br/>bacterium-02</i> | 0.0000 | 0.0000 | 0.0000 | 0.0000 | 0.0000 | 0.0000 | 0.0000 | 0.0000 | 0.0000 | 0.0000 | NA | NA |
| <i>Uncultured bacterium-01</i>                   | 0.0000 | 0.0000 | 0.0000 | 0.0000 | 0.0000 | 0.0000 | 0.0000 | 0.0000 | 0.0000 | 0.0000 | NA | NA |
| <i>Uncultured bacterium-04</i>                   | 0.0000 | 0.0000 | 0.0000 | 0.0000 | 0.0000 | 0.0000 | 0.0000 | 0.0000 | 0.0000 | 0.0000 | NA | NA |
| <i>Uncultured bacterium-06</i>                   | 0.0000 | 0.0000 | 0.0000 | 0.0000 | 0.0000 | 0.0000 | 0.0000 | 0.0000 | 0.0000 | 0.0000 | NA | NA |
| <i>Uncultured bacterium-10</i>                   | 0.0000 | 0.0000 | 0.0000 | 0.0000 | 0.0000 | 0.0000 | 0.0000 | 0.0000 | 0.0000 | 0.0000 | NA | NA |
| <i>Uncultured bacterium-11</i>                   | 0.0000 | 0.0000 | 0.0000 | 0.0000 | 0.0000 | 0.0000 | 0.0000 | 0.0000 | 0.0000 | 0.0000 | NA | NA |
| <i>Uncultured bacterium-12</i>                   | 0.0000 | 0.0000 | 0.0000 | 0.0000 | 0.0000 | 0.0000 | 0.0000 | 0.0000 | 0.0000 | 0.0000 | NA | NA |
| <i>Uncultured organism-01</i>                    | 0.0000 | 0.0000 | 0.0000 | 0.0000 | 0.0000 | 0.0000 | 0.0000 | 0.0000 | 0.0000 | 0.0000 | NA | NA |
| <i>Uncultured organism-03</i>                    | 0.0000 | 0.0000 | 0.0000 | 0.0000 | 0.0000 | 0.0000 | 0.0000 | 0.0000 | 0.0000 | 0.0000 | NA | NA |
| <i>Uncultured organism-04</i>                    | 0.0000 | 0.0000 | 0.0000 | 0.0000 | 0.0000 | 0.0000 | 0.0000 | 0.0000 | 0.0000 | 0.0000 | NA | NA |
| <i>Uncultured rumen<br/>bacterium-02</i>         | 0.0000 | 0.0000 | 0.0000 | 0.0000 | 0.0000 | 0.0000 | 0.0000 | 0.0000 | 0.0000 | 0.0000 | NA | NA |
| <i>Uncultured-17</i>                             | 0.0000 | 0.0000 | 0.0000 | 0.0000 | 0.0000 | 0.0000 | 0.0000 | 0.0000 | 0.0000 | 0.0000 | NA | NA |
| <i>Uncultured-18</i>                             | 0.0000 | 0.0000 | 0.0000 | 0.0000 | 0.0000 | 0.0000 | 0.0000 | 0.0000 | 0.0000 | 0.0000 | NA | NA |
| <i>Uncultured-19</i>                             | 0.0000 | 0.0000 | 0.0000 | 0.0000 | 0.0000 | 0.0000 | 0.0000 | 0.0000 | 0.0000 | 0.0000 | NA | NA |
| <i>{Unknown Genus}<br/>Porphyromonadaceae</i>    | 0.0000 | 0.0000 | 0.0000 | 0.0000 | 0.0000 | 0.0000 | 0.0000 | 0.0000 | 0.0000 | 0.0000 | NA | NA |

SD—standard deviation; NA—not available;  $p$ -value—calculated with the non-parametric Mann–Whitney test;

$p$ -adj.— $p$  values adjusted with Benjamini–Hochberg FDR for multiple comparisons; red font—statistically

significant results ( $p < 0.05$ )

**Table S6.** The percentage abundance of the intestinal microbiota in the study group of COVID-19 patients and healthy controls at the species level.

| Species                                             | COVID-19 patients, <i>n</i> = 8 |         |         |         |          | Controls, <i>n</i> = 14 |         |         |         |          | <i>p</i> -value | <i>p</i> - adj. |
|-----------------------------------------------------|---------------------------------|---------|---------|---------|----------|-------------------------|---------|---------|---------|----------|-----------------|-----------------|
|                                                     | Mean                            | Median  | SD      | Min.    | Max.     | Mean                    | Median  | SD      | Min.    | Max.     |                 |                 |
| <i>Uncultured Bacteroidetes bacterium-001</i>       | 0.8836                          | 0.1605  | 10.8511 | 0.0000  | 50.3916  | 0.0072                  | 0.0000  | 0.0191  | 0.0000  | 0.0697   | 0.0010          | 0.4264          |
| <i>Uncultured bacterium-159</i>                     | 0.7296                          | 0.1971  | 10.3843 | 0.0092  | 40.1029  | 0.0238                  | 0.0160  | 0.0286  | 0.0000  | 0.0923   | 0.0027          | 0.5558          |
| <i>Metagenome</i>                                   | 0.0113                          | 0.0083  | 0.0129  | 0.0000  | 0.0365   | 0.0009                  | 0.0000  | 0.0034  | 0.0000  | 0.0125   | 0.0070          | 0.6525          |
| <i>Uncultured Lachnospiraceae bacterium</i>         | 0.6735                          | 0.4051  | 10.0333 | 0.0280  | 30.1628  | 0.0958                  | 0.0177  | 0.1255  | 0.0000  | 0.3447   | 0.0085          | 0.6525          |
| <i>Uncultured bacterium-070</i>                     | 90.0130                         | 70.5285 | 40.4249 | 20.2477 | 150.7559 | 30.6931                 | 30.0242 | 20.4242 | 0.2031  | 70.9860  | 0.0086          | 0.6525          |
| <i>Uncultured bacterium-069</i>                     | 20.3393                         | 20.8579 | 10.3308 | 0.6382  | 40.1642  | 0.9252                  | 0.6275  | 0.8493  | 0.0543  | 20.8568  | 0.0105          | 0.6525          |
| <i>Uncultured organism-029</i>                      | 0.4308                          | 0.2736  | 0.5467  | 0.0364  | 10.7276  | 0.0951                  | 0.0484  | 0.1149  | 0.0000  | 0.3754   | 0.0126          | 0.6525          |
| <i>Uncultured organism-025</i>                      | 0.8141                          | 0.7307  | 0.5710  | 0.2609  | 10.8823  | 0.3304                  | 0.2089  | 0.3503  | 0.0322  | 10.3519  | 0.0127          | 0.6525          |
| <i>Uncultured Erysipelotrichaceae bacterium-002</i> | 0.0831                          | 0.0504  | 0.0943  | 0.0000  | 0.2247   | 0.0023                  | 0.0000  | 0.0050  | 0.0000  | 0.0154   | 0.0175          | 0.6704          |
| <i>Uncultured organism-027</i>                      | 0.0543                          | 0.0144  | 0.0719  | 0.0000  | 0.1813   | 0.0063                  | 0.0000  | 0.0141  | 0.0000  | 0.0439   | 0.0189          | 0.6704          |
| <i>Uncultured bacterium-120</i>                     | 0.0281                          | 0.0000  | 0.0747  | 0.0000  | 0.2127   | 0.0000                  | 0.0000  | 0.0000  | 0.0000  | 0.0000   | 0.0191          | 0.6704          |
| <i>Uncultured organism-024</i>                      | 0.0747                          | 0.0786  | 0.0674  | 0.0000  | 0.1594   | 0.0115                  | 0.0000  | 0.0202  | 0.0000  | 0.0650   | 0.0216          | 0.6704          |
| <i>Parabacteroides distasonis</i>                   | 0.0315                          | 0.0112  | 0.0435  | 0.0000  | 0.1079   | 0.0024                  | 0.0000  | 0.0089  | 0.0000  | 0.0335   | 0.0289          | 0.6704          |
| <i>Uncultured bacterium-033</i>                     | 0.3251                          | 0.1953  | 0.4565  | 0.0364  | 10.4389  | 0.0888                  | 0.0314  | 0.1356  | 0.0000  | 0.3998   | 0.0314          | 0.6704          |
| <i>Uncultured bacterium-139</i>                     | 0.0122                          | 0.0018  | 0.0296  | 0.0000  | 0.0854   | 0.0010                  | 0.0000  | 0.0039  | 0.0000  | 0.0144   | 0.0365          | 0.6704          |
| <i>Uncultured bacterium-057</i>                     | 0.5871                          | 0.5478  | 0.4037  | 0.0728  | 10.3289  | 0.2884                  | 0.1021  | 0.4319  | 0.0119  | 10.3609  | 0.0374          | 0.6704          |
| <i>Uncultured organism-036</i>                      | 0.3859                          | 0.2865  | 0.2600  | 0.1597  | 0.9994   | 0.8421                  | 0.7487  | 0.5702  | 0.0080  | 10.7918  | 0.0374          | 0.6704          |
| <i>Bilophila wadsworthia 3_1_6</i>                  | 0.0211                          | 0.0125  | 0.0279  | 0.0000  | 0.0838   | 0.0044                  | 0.0000  | 0.0089  | 0.0000  | 0.0251   | 0.0404          | 0.6704          |
| <i>Uncultured bacterium-006</i>                     | 0.0311                          | 0.0035  | 0.0445  | 0.0000  | 0.1109   | 0.0019                  | 0.0000  | 0.0058  | 0.0000  | 0.0217   | 0.0504          | 0.6704          |
| <i>Eubacterium hallii</i> DSM 3353                  | 0.2026                          | 0.1759  | 0.2223  | 0.0035  | 0.6670   | 0.0580                  | 0.0148  | 0.0850  | 0.0000  | 0.2422   | 0.0504          | 0.6704          |
| <i>Uncultured bacterium-094</i>                     | 0.4804                          | 0.4065  | 0.3781  | 0.0785  | 10.3589  | 0.2595                  | 0.1913  | 0.2426  | 0.0098  | 0.8306   | 0.0518          | 0.6704          |
| <i>Uncultured bacterium-011</i>                     | 0.0187                          | 0.0060  | 0.0389  | 0.0000  | 0.1139   | 0.0017                  | 0.0000  | 0.0038  | 0.0000  | 0.0125   | 0.0574          | 0.6704          |
| <i>Uncultured bacterium-075</i>                     | 110.2305                        | 10.7596 | 40.0247 | 50.1146 | 160.2072 | 80.0466                 | 60.6156 | 50.7639 | 20.9551 | 250.2438 | 0.0605          | 0.6704          |
| <i>Bacterium NLAE-zl-P241</i>                       | 0.0138                          | 0.0000  | 0.0352  | 0.0000  | 0.1005   | 0.0000                  | 0.0000  | 0.0000  | 0.0000  | 0.0000   | 0.0648          | 0.6704          |
| <i>Enterobacter hormaechei-002</i>                  | 0.0043                          | 0.0000  | 0.0084  | 0.0000  | 0.0223   | 0.0000                  | 0.0000  | 0.0000  | 0.0000  | 0.0000   | 0.0648          | 0.6704          |
| <i>Gordonibacter pamelaiae</i>                      | 0.0008                          | 0.0000  | 0.0016  | 0.0000  | 0.0041   | 0.0000                  | 0.0000  | 0.0000  | 0.0000  | 0.0000   | 0.0648          | 0.6704          |
| <i>Uncultured Adlercreutzia sp</i>                  | 0.0011                          | 0.0000  | 0.0021  | 0.0000  | 0.0048   | 0.0000                  | 0.0000  | 0.0000  | 0.0000  | 0.0000   | 0.0648          | 0.6704          |
| <i>Uncultured bacterium-051</i>                     | 0.0020                          | 0.0000  | 0.0043  | 0.0000  | 0.0122   | 0.0000                  | 0.0000  | 0.0000  | 0.0000  | 0.0000   | 0.0648          | 0.6704          |
| <i>Uncultured bacterium-131</i>                     | 0.0054                          | 0.0000  | 0.0128  | 0.0000  | 0.0366   | 0.0000                  | 0.0000  | 0.0000  | 0.0000  | 0.0000   | 0.0648          | 0.6704          |
| <i>Uncultured bacterium-142</i>                     | 0.0107                          | 0.0000  | 0.0202  | 0.0000  | 0.0494   | 0.0000                  | 0.0000  | 0.0000  | 0.0000  | 0.0000   | 0.0648          | 0.6704          |

|                                                         |         |        |         |        |         |         |        |         |        |          |        |        |
|---------------------------------------------------------|---------|--------|---------|--------|---------|---------|--------|---------|--------|----------|--------|--------|
| {Unknown Family}<br><i>Bacteroidales</i>                | 0.0016  | 0.0000 | 0.0037  | 0.0000 | 0.0106  | 0.0000  | 0.0000 | 0.0000  | 0.0000 | 0.0000   | 0.0648 | 0.6704 |
| <i>Uncultured Firmicutes<br/>bacterium-002</i>          | 0.0086  | 0.0000 | 0.0124  | 0.0000 | 0.0280  | 0.0003  | 0.0000 | 0.0011  | 0.0000 | 0.0043   | 0.0679 | 0.6704 |
| <i>Uncultured bacterium-<br/>039</i>                    | 0.4477  | 0.3193 | 0.4770  | 0.0652 | 10.5312 | 0.1956  | 0.0473 | 0.2737  | 0.0000 | 0.8772   | 0.0697 | 0.6704 |
| <i>Uncultured organism-<br/>028</i>                     | 0.1535  | 0.0453 | 0.2154  | 0.0092 | 0.5177  | 0.0456  | 0.0122 | 0.0792  | 0.0000 | 0.2941   | 0.0697 | 0.6704 |
| <i>Uncultured bacterium-<br/>140</i>                    | 0.0000  | 0.0000 | 0.0000  | 0.0000 | 0.0000  | 0.0150  | 0.0000 | 0.0377  | 0.0000 | 0.1412   | 0.0699 | 0.6704 |
| <i>Uncultured bacterium-<br/>110</i>                    | 0.1487  | 0.1088 | 0.1666  | 0.0000 | 0.4580  | 0.0338  | 0.0026 | 0.0960  | 0.0000 | 0.3646   | 0.0715 | 0.6704 |
| <i>Uncultured bacterium-<br/>017</i>                    | 10.2400 | 0.9065 | 10.2340 | 0.0112 | 20.8641 | 0.6259  | 0.0415 | 0.9207  | 0.0000 | 20.6966  | 0.0788 | 0.6704 |
| <i>Human gut metagenome-<br/>010</i>                    | 0.1541  | 0.0970 | 0.1486  | 0.0141 | 0.3947  | 0.0622  | 0.0252 | 0.0806  | 0.0000 | 0.2409   | 0.0814 | 0.6704 |
| <i>Uncultured bacterium-<br/>086</i>                    | 0.2494  | 0.0313 | 0.4029  | 0.0035 | 0.9499  | 0.5829  | 0.2827 | 0.8441  | 0.0038 | 30.0474  | 0.0818 | 0.6704 |
| <i>Uncultured bacterium-<br/>025</i>                    | 0.4095  | 0.0240 | 0.9653  | 0.0000 | 20.7796 | 0.1011  | 0.0000 | 0.3611  | 0.0000 | 10.3552  | 0.0997 | 0.6704 |
| <i>Uncultured bacterium-<br/>024</i>                    | 0.0000  | 0.0000 | 0.0000  | 0.0000 | 0.0000  | 0.5155  | 0.0000 | 10.3388 | 0.0000 | 50.0191  | 0.1159 | 0.6704 |
| <i>Uncultured bacterium-<br/>148</i>                    | 0.0000  | 0.0000 | 0.0000  | 0.0000 | 0.0000  | 0.0028  | 0.0000 | 0.0052  | 0.0000 | 0.0158   | 0.1159 | 0.6704 |
| <i>Uncultured organism-<br/>011</i>                     | 0.0000  | 0.0000 | 0.0000  | 0.0000 | 0.0000  | 20.5753 | 0.0000 | 60.0614 | 0.0000 | 190.0372 | 0.1159 | 0.6704 |
| <i>Bacterium enrichment<br/>culture clone Ecwsrb007</i> | 0.4388  | 0.0139 | 10.1727 | 0.0000 | 30.3399 | 0.0415  | 0.0000 | 0.1405  | 0.0000 | 0.5289   | 0.1165 | 0.6704 |
| <i>Uncultured organism-<br/>042</i>                     | 0.1351  | 0.0077 | 0.3516  | 0.0000 | 10.0047 | 0.0481  | 0.0279 | 0.0405  | 0.0000 | 0.1058   | 0.1225 | 0.6704 |
| <i>Clostridium spiroforme<br/>DSM 1552</i>              | 0.0020  | 0.0000 | 0.0033  | 0.0000 | 0.0092  | 0.0011  | 0.0000 | 0.0041  | 0.0000 | 0.0155   | 0.1282 | 0.6704 |
| <i>Uncultured Firmicutes<br/>bacterium-006</i>          | 0.0014  | 0.0000 | 0.0020  | 0.0000 | 0.0046  | 0.0011  | 0.0000 | 0.0041  | 0.0000 | 0.0155   | 0.1282 | 0.6704 |
| <i>Uncultured bacterium-<br/>076</i>                    | 0.0736  | 0.0520 | 0.0725  | 0.0073 | 0.2127  | 0.0814  | 0.0077 | 0.1601  | 0.0000 | 0.5560   | 0.1411 | 0.6704 |
| <i>Uncultured organism-<br/>001</i>                     | 0.0529  | 0.0000 | 0.0886  | 0.0000 | 0.2466  | 0.0048  | 0.0000 | 0.0122  | 0.0000 | 0.0339   | 0.1497 | 0.6704 |
| <i>Flavonifractor plautii</i>                           | 0.0049  | 0.0028 | 0.0057  | 0.0000 | 0.0142  | 0.0025  | 0.0000 | 0.0055  | 0.0000 | 0.0152   | 0.1541 | 0.6704 |
| <i>Uncultured organism-<br/>020</i>                     | 0.0262  | 0.0218 | 0.0210  | 0.0000 | 0.0637  | 0.0145  | 0.0063 | 0.0190  | 0.0000 | 0.0619   | 0.1619 | 0.6704 |
| <i>Uncultured bacterium-<br/>113</i>                    | 0.0660  | 0.0140 | 0.1101  | 0.0000 | 0.3084  | 0.0476  | 0.0000 | 0.1087  | 0.0000 | 0.3486   | 0.1681 | 0.6704 |
| <i>Human gut metagenome-<br/>001</i>                    | 0.0847  | 0.0165 | 0.1605  | 0.0000 | 0.4705  | 0.3320  | 0.1039 | 0.5410  | 0.0000 | 10.8863  | 0.1807 | 0.6704 |
| <i>Uncultured bacterium-<br/>073</i>                    | 0.2340  | 0.2009 | 0.1399  | 0.0392 | 0.4599  | 0.3082  | 0.0872 | 0.5179  | 0.0121 | 10.6048  | 0.1832 | 0.6704 |
| <i>Acidaminococcus<br/>intestini</i>                    | 0.0000  | 0.0000 | 0.0000  | 0.0000 | 0.0000  | 0.0297  | 0.0000 | 0.0876  | 0.0000 | 0.3275   | 0.1885 | 0.6704 |
| <i>Bifidobacterium<br/>ruminantium</i>                  | 0.0000  | 0.0000 | 0.0000  | 0.0000 | 0.0000  | 0.1352  | 0.0000 | 0.4501  | 0.0000 | 10.6918  | 0.1885 | 0.6704 |
| <i>Rumen bacterium<br/>2/9293-18</i>                    | 0.0000  | 0.0000 | 0.0000  | 0.0000 | 0.0000  | 0.0124  | 0.0000 | 0.0433  | 0.0000 | 0.1625   | 0.1885 | 0.6704 |
| <i>Uncultured Bacteroidetes<br/>bacterium-003</i>       | 0.0000  | 0.0000 | 0.0000  | 0.0000 | 0.0000  | 0.0017  | 0.0000 | 0.0038  | 0.0000 | 0.0125   | 0.1885 | 0.6704 |
| <i>Uncultured bacterium-<br/>118</i>                    | 0.0000  | 0.0000 | 0.0000  | 0.0000 | 0.0000  | 0.0018  | 0.0000 | 0.0043  | 0.0000 | 0.0152   | 0.1885 | 0.6704 |
| <i>Uncultured organism-<br/>004</i>                     | 0.0035  | 0.0016 | 0.0060  | 0.0000 | 0.0176  | 0.0364  | 0.0083 | 0.0869  | 0.0000 | 0.3298   | 0.1910 | 0.6704 |
| <i>Uncultured<br/>Christensenellaceae<br/>bacterium</i> | 0.0137  | 0.0000 | 0.0387  | 0.0000 | 0.1094  | 0.0643  | 0.0000 | 0.1570  | 0.0000 | 0.5934   | 0.2008 | 0.6704 |
| <i>Butyrate-producing<br/>bacterium PH07BW09</i>        | 0.0082  | 0.0028 | 0.0148  | 0.0000 | 0.0439  | 0.0035  | 0.0000 | 0.0074  | 0.0000 | 0.0223   | 0.2064 | 0.6704 |

|                                                              |        |        |        |        |        |        |        |         |        |         |        |        |
|--------------------------------------------------------------|--------|--------|--------|--------|--------|--------|--------|---------|--------|---------|--------|--------|
| Uncultured <i>Streptococcus</i> sp                           | 0.1259 | 0.0000 | 0.3395 | 0.0000 | 0.9656 | 0.0017 | 0.0000 | 0.0043  | 0.0000 | 0.0125  | 0.2096 | 0.6704 |
| Uncultured bacterium-135                                     | 0.0154 | 0.0087 | 0.0181 | 0.0000 | 0.0490 | 0.3989 | 0.0000 | 10.3258 | 0.0000 | 40.9796 | 0.2188 | 0.6704 |
| <i>Anaerostipes</i> sp. 1y-2                                 | 0.0003 | 0.0000 | 0.0008 | 0.0000 | 0.0024 | 0.0000 | 0.0000 | 0.0000  | 0.0000 | 0.0000  | 0.2193 | 0.6704 |
| <i>Bacterium</i> NLAE-zl-H512                                | 0.0008 | 0.0000 | 0.0023 | 0.0000 | 0.0064 | 0.0000 | 0.0000 | 0.0000  | 0.0000 | 0.0000  | 0.2193 | 0.6704 |
| <i>Bacterium</i> YE57                                        | 0.0003 | 0.0000 | 0.0009 | 0.0000 | 0.0025 | 0.0000 | 0.0000 | 0.0000  | 0.0000 | 0.0000  | 0.2193 | 0.6704 |
| <i>Bacteroides</i> sp. R6                                    | 0.0003 | 0.0000 | 0.0009 | 0.0000 | 0.0025 | 0.0000 | 0.0000 | 0.0000  | 0.0000 | 0.0000  | 0.2193 | 0.6704 |
| <i>Bifidobacterium kashiwanohense</i>                        | 0.0012 | 0.0000 | 0.0034 | 0.0000 | 0.0096 | 0.0000 | 0.0000 | 0.0000  | 0.0000 | 0.0000  | 0.2193 | 0.6704 |
| <i>Bifidobacterium saeculare</i>                             | 0.0035 | 0.0000 | 0.0098 | 0.0000 | 0.0277 | 0.0000 | 0.0000 | 0.0000  | 0.0000 | 0.0000  | 0.2193 | 0.6704 |
| Clostridiales bacterium DJF_B152                             | 0.0012 | 0.0000 | 0.0034 | 0.0000 | 0.0097 | 0.0000 | 0.0000 | 0.0000  | 0.0000 | 0.0000  | 0.2193 | 0.6704 |
| Clostridiales bacterium canine oral taxon 219                | 0.0005 | 0.0000 | 0.0014 | 0.0000 | 0.0041 | 0.0000 | 0.0000 | 0.0000  | 0.0000 | 0.0000  | 0.2193 | 0.6704 |
| <i>Clostridium</i> sp                                        | 0.0004 | 0.0000 | 0.0011 | 0.0000 | 0.0032 | 0.0000 | 0.0000 | 0.0000  | 0.0000 | 0.0000  | 0.2193 | 0.6704 |
| <i>Clostridium</i> sp. TM-40                                 | 0.0115 | 0.0000 | 0.0327 | 0.0000 | 0.0924 | 0.0000 | 0.0000 | 0.0000  | 0.0000 | 0.0000  | 0.2193 | 0.6704 |
| <i>Eggerthella lenta</i> DSM 2243                            | 0.0010 | 0.0000 | 0.0029 | 0.0000 | 0.0081 | 0.0000 | 0.0000 | 0.0000  | 0.0000 | 0.0000  | 0.2193 | 0.6704 |
| <i>Enterobacter ludwigii</i>                                 | 0.0005 | 0.0000 | 0.0014 | 0.0000 | 0.0041 | 0.0000 | 0.0000 | 0.0000  | 0.0000 | 0.0000  | 0.2193 | 0.6704 |
| <i>Enterobacter</i> sp. E177e                                | 0.0005 | 0.0000 | 0.0014 | 0.0000 | 0.0041 | 0.0000 | 0.0000 | 0.0000  | 0.0000 | 0.0000  | 0.2193 | 0.6704 |
| <i>Enterococcus durans</i>                                   | 0.0041 | 0.0000 | 0.0115 | 0.0000 | 0.0325 | 0.0000 | 0.0000 | 0.0000  | 0.0000 | 0.0000  | 0.2193 | 0.6704 |
| <i>Enterococcus faecium</i>                                  | 0.0020 | 0.0000 | 0.0058 | 0.0000 | 0.0163 | 0.0000 | 0.0000 | 0.0000  | 0.0000 | 0.0000  | 0.2193 | 0.6704 |
| <i>Enterococcus lactis</i>                                   | 0.0030 | 0.0000 | 0.0086 | 0.0000 | 0.0244 | 0.0000 | 0.0000 | 0.0000  | 0.0000 | 0.0000  | 0.2193 | 0.6704 |
| <i>Enterococcus</i> sp. CGLBL186                             | 0.0114 | 0.0000 | 0.0323 | 0.0000 | 0.0915 | 0.0000 | 0.0000 | 0.0000  | 0.0000 | 0.0000  | 0.2193 | 0.6704 |
| <i>Enterococcus</i> sp. MIT7B1                               | 0.0005 | 0.0000 | 0.0014 | 0.0000 | 0.0041 | 0.0000 | 0.0000 | 0.0000  | 0.0000 | 0.0000  | 0.2193 | 0.6704 |
| <i>Eubacterium fissicatena</i>                               | 0.0018 | 0.0000 | 0.0051 | 0.0000 | 0.0143 | 0.0000 | 0.0000 | 0.0000  | 0.0000 | 0.0000  | 0.2193 | 0.6704 |
| <i>Eubacterium</i> sp. 3_1_31                                | 0.0006 | 0.0000 | 0.0016 | 0.0000 | 0.0046 | 0.0000 | 0.0000 | 0.0000  | 0.0000 | 0.0000  | 0.2193 | 0.6704 |
| Human gut metagenome-013                                     | 0.0104 | 0.0000 | 0.0293 | 0.0000 | 0.0829 | 0.0000 | 0.0000 | 0.0000  | 0.0000 | 0.0000  | 0.2193 | 0.6704 |
| <i>Leuconostoc mesenteroides</i>                             | 0.0015 | 0.0000 | 0.0043 | 0.0000 | 0.0122 | 0.0000 | 0.0000 | 0.0000  | 0.0000 | 0.0000  | 0.2193 | 0.6704 |
| <i>Leuconostoc mesenteroides</i> subsp. <i>mesenteroides</i> | 0.0005 | 0.0000 | 0.0014 | 0.0000 | 0.0041 | 0.0000 | 0.0000 | 0.0000  | 0.0000 | 0.0000  | 0.2193 | 0.6704 |
| <i>Parabacteroides goldsteinii</i> dnLKV18                   | 0.0008 | 0.0000 | 0.0023 | 0.0000 | 0.0065 | 0.0000 | 0.0000 | 0.0000  | 0.0000 | 0.0000  | 0.2193 | 0.6704 |
| <i>Providencia</i> sp. enrichment culture clone SRC_NBB4     | 0.0005 | 0.0000 | 0.0014 | 0.0000 | 0.0041 | 0.0000 | 0.0000 | 0.0000  | 0.0000 | 0.0000  | 0.2193 | 0.6704 |
| <i>Streptococcus suis</i> SC84                               | 0.0009 | 0.0000 | 0.0025 | 0.0000 | 0.0071 | 0.0000 | 0.0000 | 0.0000  | 0.0000 | 0.0000  | 0.2193 | 0.6704 |
| <i>Trueperella pyogenes</i>                                  | 0.0005 | 0.0000 | 0.0014 | 0.0000 | 0.0039 | 0.0000 | 0.0000 | 0.0000  | 0.0000 | 0.0000  | 0.2193 | 0.6704 |
| Uncultured <i>Actinomycetales</i> bacterium                  | 0.0015 | 0.0000 | 0.0042 | 0.0000 | 0.0118 | 0.0000 | 0.0000 | 0.0000  | 0.0000 | 0.0000  | 0.2193 | 0.6704 |
| Uncultured <i>Arcanobacterium</i> sp                         | 0.0005 | 0.0000 | 0.0014 | 0.0000 | 0.0039 | 0.0000 | 0.0000 | 0.0000  | 0.0000 | 0.0000  | 0.2193 | 0.6704 |
| Uncultured <i>Bacillales</i> bacterium                       | 0.0062 | 0.0000 | 0.0174 | 0.0000 | 0.0494 | 0.0000 | 0.0000 | 0.0000  | 0.0000 | 0.0000  | 0.2193 | 0.6704 |
| Uncultured <i>Bacteroidales</i> bacterium-002                | 0.0007 | 0.0000 | 0.0020 | 0.0000 | 0.0056 | 0.0000 | 0.0000 | 0.0000  | 0.0000 | 0.0000  | 0.2193 | 0.6704 |
| Uncultured <i>Bacteroidetes</i> bacterium-002                | 0.0009 | 0.0000 | 0.0025 | 0.0000 | 0.0071 | 0.0000 | 0.0000 | 0.0000  | 0.0000 | 0.0000  | 0.2193 | 0.6704 |
| Uncultured <i>Desulfovibrio</i> sp                           | 0.0056 | 0.0000 | 0.0158 | 0.0000 | 0.0448 | 0.0000 | 0.0000 | 0.0000  | 0.0000 | 0.0000  | 0.2193 | 0.6704 |
| Uncultured <i>Firmicutes</i> bacterium-008                   | 0.0018 | 0.0000 | 0.0050 | 0.0000 | 0.0141 | 0.0000 | 0.0000 | 0.0000  | 0.0000 | 0.0000  | 0.2193 | 0.6704 |
| Uncultured <i>Klebsiella</i> sp-002                          | 0.0006 | 0.0000 | 0.0017 | 0.0000 | 0.0049 | 0.0000 | 0.0000 | 0.0000  | 0.0000 | 0.0000  | 0.2193 | 0.6704 |
| Uncultured <i>Ruminococcus</i> sp                            | 0.0019 | 0.0000 | 0.0052 | 0.0000 | 0.0148 | 0.0000 | 0.0000 | 0.0000  | 0.0000 | 0.0000  | 0.2193 | 0.6704 |

|                                             |         |         |         |         |         |         |         |         |        |         |        |        |
|---------------------------------------------|---------|---------|---------|---------|---------|---------|---------|---------|--------|---------|--------|--------|
| <i>Uncultured Shigella sp-002</i>           | 0.0216  | 0.0000  | 0.0611  | 0.0000  | 0.1728  | 0.0000  | 0.0000  | 0.0000  | 0.0000 | 0.0000  | 0.2193 | 0.6704 |
| <i>Uncultured bacterium-003</i>             | 0.0040  | 0.0000  | 0.0113  | 0.0000  | 0.0319  | 0.0000  | 0.0000  | 0.0000  | 0.0000 | 0.0000  | 0.2193 | 0.6704 |
| <i>Uncultured bacterium-007</i>             | 0.0018  | 0.0000  | 0.0051  | 0.0000  | 0.0143  | 0.0000  | 0.0000  | 0.0000  | 0.0000 | 0.0000  | 0.2193 | 0.6704 |
| <i>Uncultured bacterium-021</i>             | 0.0003  | 0.0000  | 0.0008  | 0.0000  | 0.0024  | 0.0000  | 0.0000  | 0.0000  | 0.0000 | 0.0000  | 0.2193 | 0.6704 |
| <i>Uncultured bacterium-035</i>             | 0.0004  | 0.0000  | 0.0012  | 0.0000  | 0.0035  | 0.0000  | 0.0000  | 0.0000  | 0.0000 | 0.0000  | 0.2193 | 0.6704 |
| <i>Uncultured bacterium-043</i>             | 0.0006  | 0.0000  | 0.0017  | 0.0000  | 0.0049  | 0.0000  | 0.0000  | 0.0000  | 0.0000 | 0.0000  | 0.2193 | 0.6704 |
| <i>Uncultured bacterium-049</i>             | 0.0006  | 0.0000  | 0.0017  | 0.0000  | 0.0049  | 0.0000  | 0.0000  | 0.0000  | 0.0000 | 0.0000  | 0.2193 | 0.6704 |
| <i>Uncultured bacterium-052</i>             | 0.0054  | 0.0000  | 0.0152  | 0.0000  | 0.0430  | 0.0000  | 0.0000  | 0.0000  | 0.0000 | 0.0000  | 0.2193 | 0.6704 |
| <i>Uncultured bacterium-065</i>             | 0.0012  | 0.0000  | 0.0035  | 0.0000  | 0.0098  | 0.0000  | 0.0000  | 0.0000  | 0.0000 | 0.0000  | 0.2193 | 0.6704 |
| <i>Uncultured bacterium-077</i>             | 0.0004  | 0.0000  | 0.0011  | 0.0000  | 0.0032  | 0.0000  | 0.0000  | 0.0000  | 0.0000 | 0.0000  | 0.2193 | 0.6704 |
| <i>Uncultured bacterium-085</i>             | 0.0009  | 0.0000  | 0.0025  | 0.0000  | 0.0071  | 0.0000  | 0.0000  | 0.0000  | 0.0000 | 0.0000  | 0.2193 | 0.6704 |
| <i>Uncultured bacterium-121</i>             | 0.0004  | 0.0000  | 0.0011  | 0.0000  | 0.0032  | 0.0000  | 0.0000  | 0.0000  | 0.0000 | 0.0000  | 0.2193 | 0.6704 |
| <i>Uncultured bacterium-126</i>             | 0.0004  | 0.0000  | 0.0011  | 0.0000  | 0.0032  | 0.0000  | 0.0000  | 0.0000  | 0.0000 | 0.0000  | 0.2193 | 0.6704 |
| <i>Uncultured marine bacterium-002</i>      | 0.0005  | 0.0000  | 0.0014  | 0.0000  | 0.0041  | 0.0000  | 0.0000  | 0.0000  | 0.0000 | 0.0000  | 0.2193 | 0.6704 |
| <i>Uncultured organism-017</i>              | 0.0008  | 0.0000  | 0.0023  | 0.0000  | 0.0065  | 0.0000  | 0.0000  | 0.0000  | 0.0000 | 0.0000  | 0.2193 | 0.6704 |
| <i>Uncultured organism-033</i>              | 0.0005  | 0.0000  | 0.0014  | 0.0000  | 0.0041  | 0.0000  | 0.0000  | 0.0000  | 0.0000 | 0.0000  | 0.2193 | 0.6704 |
| <i>Uncultured organism-038</i>              | 0.0004  | 0.0000  | 0.0011  | 0.0000  | 0.0032  | 0.0000  | 0.0000  | 0.0000  | 0.0000 | 0.0000  | 0.2193 | 0.6704 |
| <i>Uncultured rumen bacterium 4C28d-12</i>  | 0.0003  | 0.0000  | 0.0009  | 0.0000  | 0.0025  | 0.0000  | 0.0000  | 0.0000  | 0.0000 | 0.0000  | 0.2193 | 0.6704 |
| <i>Uncultured rumen bacterium-015</i>       | 0.0004  | 0.0000  | 0.0012  | 0.0000  | 0.0035  | 0.0000  | 0.0000  | 0.0000  | 0.0000 | 0.0000  | 0.2193 | 0.6704 |
| <i>Unidentified-002</i>                     | 0.0003  | 0.0000  | 0.0009  | 0.0000  | 0.0025  | 0.0000  | 0.0000  | 0.0000  | 0.0000 | 0.0000  | 0.2193 | 0.6704 |
| <i>Unidentified-004</i>                     | 0.0004  | 0.0000  | 0.0012  | 0.0000  | 0.0035  | 0.0000  | 0.0000  | 0.0000  | 0.0000 | 0.0000  | 0.2193 | 0.6704 |
| <i>Unidentified-006</i>                     | 0.0006  | 0.0000  | 0.0016  | 0.0000  | 0.0046  | 0.0000  | 0.0000  | 0.0000  | 0.0000 | 0.0000  | 0.2193 | 0.6704 |
| <i>Unidentified-008</i>                     | 0.0003  | 0.0000  | 0.0009  | 0.0000  | 0.0025  | 0.0000  | 0.0000  | 0.0000  | 0.0000 | 0.0000  | 0.2193 | 0.6704 |
| <i>Unidentified-009</i>                     | 0.0004  | 0.0000  | 0.0012  | 0.0000  | 0.0035  | 0.0000  | 0.0000  | 0.0000  | 0.0000 | 0.0000  | 0.2193 | 0.6704 |
| <i>{Unknown Class} Bacteroidetes</i>        | 0.0014  | 0.0000  | 0.0039  | 0.0000  | 0.0111  | 0.0000  | 0.0000  | 0.0000  | 0.0000 | 0.0000  | 0.2193 | 0.6704 |
| <i>{Unknown Phylum} Bacteria</i>            | 0.0010  | 0.0000  | 0.0028  | 0.0000  | 0.0078  | 0.0000  | 0.0000  | 0.0000  | 0.0000 | 0.0000  | 0.2193 | 0.6704 |
| <i>{Unknown Species} Arcanobacterium</i>    | 0.0005  | 0.0000  | 0.0014  | 0.0000  | 0.0039  | 0.0000  | 0.0000  | 0.0000  | 0.0000 | 0.0000  | 0.2193 | 0.6704 |
| <i>{Unknown Species} Bacteroides</i>        | 0.0003  | 0.0000  | 0.0008  | 0.0000  | 0.0024  | 0.0000  | 0.0000  | 0.0000  | 0.0000 | 0.0000  | 0.2193 | 0.6704 |
| <i>{Unknown Species} Bifidobacterium</i>    | 0.0004  | 0.0000  | 0.0011  | 0.0000  | 0.0032  | 0.0000  | 0.0000  | 0.0000  | 0.0000 | 0.0000  | 0.2193 | 0.6704 |
| <i>Uncultured bacterium-027</i>             | 0.0232  | 0.0000  | 0.0632  | 0.0000  | 0.1795  | 0.8770  | 0.0000  | 10.9006 | 0.0000 | 60.7999 | 0.2197 | 0.6704 |
| <i>Uncultured bacterium-010</i>             | 0.0022  | 0.0000  | 0.0041  | 0.0000  | 0.0102  | 0.0003  | 0.0000  | 0.0010  | 0.0000 | 0.0038  | 0.2299 | 0.6704 |
| <i>Uncultured Firmicutes bacterium-003</i>  | 0.3041  | 0.1308  | 0.3777  | 0.0159  | 0.9954  | 0.5656  | 0.3050  | 0.6845  | 0.0000 | 20.5667 | 0.2323 | 0.6704 |
| <i>Uncultured bacterium-080</i>             | 20.8897 | 20.4284 | 10.7053 | 10.5017 | 60.6169 | 20.0262 | 10.7490 | 10.7909 | 0.0000 | 60.5916 | 0.2323 | 0.6704 |
| <i>Uncultured alpha proteobacterium-001</i> | 0.0171  | 0.0000  | 0.0247  | 0.0000  | 0.0610  | 0.0014  | 0.0000  | 0.0029  | 0.0000 | 0.0077  | 0.2583 | 0.6704 |



|                                                    |         |         |         |        |         |         |         |         |        |          |        |        |
|----------------------------------------------------|---------|---------|---------|--------|---------|---------|---------|---------|--------|----------|--------|--------|
| <i>Faecalibacterium cf0. prausnitzii</i> KLE1255   | 0.1612  | 0.0528  | 0.2144  | 0.0041 | 0.5751  | 0.2954  | 0.1389  | 0.3969  | 0.0000 | 10.4741  | 0.2601 | 0.6704 |
| Uncultured organism-045                            | 0.4300  | 0.2459  | 0.4716  | 0.0346 | 10.2541 | 0.7979  | 0.4368  | 0.9862  | 0.0505 | 30.6191  | 0.2601 | 0.6704 |
| Uncultured bacterium-133                           | 0.3132  | 0.0352  | 0.5436  | 0.0000 | 10.4108 | 0.1510  | 0.0000  | 0.3522  | 0.0000 | 10.1572  | 0.2636 | 0.6704 |
| Uncultured bacterium-078                           | 0.0053  | 0.0000  | 0.0128  | 0.0000 | 0.0366  | 0.0468  | 0.0049  | 0.1465  | 0.0000 | 0.5547   | 0.2669 | 0.6704 |
| <i>Bacteroidetes bacterium</i> Eg28                | 0.0023  | 0.0000  | 0.0054  | 0.0000 | 0.0153  | 0.0009  | 0.0000  | 0.0035  | 0.0000 | 0.0132   | 0.2774 | 0.6704 |
| Uncultured <i>Enterobacteriaceae</i> bacterium-002 | 0.1640  | 0.0000  | 0.4627  | 0.0000 | 10.3091 | 0.0024  | 0.0000  | 0.0091  | 0.0000 | 0.0342   | 0.2774 | 0.6704 |
| Uncultured bacterium-130                           | 0.0330  | 0.0000  | 0.0918  | 0.0000 | 0.2602  | 0.0096  | 0.0000  | 0.0358  | 0.0000 | 0.1338   | 0.2774 | 0.6704 |
| Uncultured bacterium-058                           | 0.0166  | 0.0000  | 0.0429  | 0.0000 | 0.1226  | 0.0020  | 0.0000  | 0.0051  | 0.0000 | 0.0150   | 0.2851 | 0.6704 |
| Uncultured organism-023                            | 0.0015  | 0.0000  | 0.0021  | 0.0000 | 0.0049  | 0.0006  | 0.0000  | 0.0014  | 0.0000 | 0.0040   | 0.2851 | 0.6704 |
| Uncultured organism-007                            | 0.0216  | 0.0125  | 0.0187  | 0.0000 | 0.0546  | 0.0970  | 0.0470  | 0.1200  | 0.0000 | 0.3580   | 0.2874 | 0.6704 |
| Uncultured organism-035                            | 0.5475  | 0.4842  | 0.5976  | 0.0353 | 10.8558 | 0.3152  | 0.2192  | 0.3619  | 0.0000 | 10.3922  | 0.2900 | 0.6704 |
| Human gut metagenome-007                           | 0.0325  | 0.0060  | 0.0498  | 0.0000 | 0.1434  | 0.0476  | 0.0019  | 0.1355  | 0.0000 | 0.5139   | 0.2942 | 0.6704 |
| <i>Campylobacter jejuni</i> RM1221                 | 0.0000  | 0.0000  | 0.0000  | 0.0000 | 0.0000  | 0.1163  | 0.0000  | 0.4179  | 0.0000 | 10.5671  | 0.3050 | 0.6704 |
| Human gut metagenome-002                           | 0.0000  | 0.0000  | 0.0000  | 0.0000 | 0.0000  | 0.1900  | 0.0000  | 0.6636  | 0.0000 | 20.4901  | 0.3050 | 0.6704 |
| Uncultured <i>Clostridia</i> bacterium             | 0.0000  | 0.0000  | 0.0000  | 0.0000 | 0.0000  | 0.0026  | 0.0000  | 0.0072  | 0.0000 | 0.0251   | 0.3050 | 0.6704 |
| Uncultured <i>Clostridiales</i> bacterium-002      | 0.0000  | 0.0000  | 0.0000  | 0.0000 | 0.0000  | 0.0008  | 0.0000  | 0.0022  | 0.0000 | 0.0075   | 0.3050 | 0.6704 |
| Uncultured <i>Dialister</i> sp                     | 0.0000  | 0.0000  | 0.0000  | 0.0000 | 0.0000  | 0.0102  | 0.0000  | 0.0342  | 0.0000 | 0.1283   | 0.3050 | 0.6704 |
| Uncultured bacterium-044                           | 0.0000  | 0.0000  | 0.0000  | 0.0000 | 0.0000  | 0.0134  | 0.0000  | 0.0343  | 0.0000 | 0.1047   | 0.3050 | 0.6704 |
| Uncultured bacterium-071                           | 0.0000  | 0.0000  | 0.0000  | 0.0000 | 0.0000  | 0.0119  | 0.0000  | 0.0399  | 0.0000 | 0.1495   | 0.3050 | 0.6704 |
| Uncultured bacterium-101                           | 0.0000  | 0.0000  | 0.0000  | 0.0000 | 0.0000  | 0.0007  | 0.0000  | 0.0017  | 0.0000 | 0.0052   | 0.3050 | 0.6704 |
| Uncultured bacterium-112                           | 0.0000  | 0.0000  | 0.0000  | 0.0000 | 0.0000  | 0.0065  | 0.0000  | 0.0164  | 0.0000 | 0.0457   | 0.3050 | 0.6704 |
| Uncultured bacterium-123                           | 0.0000  | 0.0000  | 0.0000  | 0.0000 | 0.0000  | 0.0020  | 0.0000  | 0.0062  | 0.0000 | 0.0231   | 0.3050 | 0.6704 |
| Uncultured bacterium-149                           | 0.0000  | 0.0000  | 0.0000  | 0.0000 | 0.0000  | 0.0011  | 0.0000  | 0.0028  | 0.0000 | 0.0080   | 0.3050 | 0.6704 |
| Uncultured organism-014                            | 0.0000  | 0.0000  | 0.0000  | 0.0000 | 0.0000  | 0.0022  | 0.0000  | 0.0058  | 0.0000 | 0.0192   | 0.3050 | 0.6704 |
| Uncultured organism-049                            | 0.0000  | 0.0000  | 0.0000  | 0.0000 | 0.0000  | 0.1701  | 0.0000  | 0.4601  | 0.0000 | 10.5918  | 0.3050 | 0.6704 |
| Uncultured organism-054                            | 0.0000  | 0.0000  | 0.0000  | 0.0000 | 0.0000  | 0.0111  | 0.0000  | 0.0406  | 0.0000 | 0.1523   | 0.3050 | 0.6704 |
| Uncultured rumen bacterium-006                     | 0.0000  | 0.0000  | 0.0000  | 0.0000 | 0.0000  | 0.0035  | 0.0000  | 0.0111  | 0.0000 | 0.0415   | 0.3050 | 0.6704 |
| Uncultured sediment bacterium                      | 0.0000  | 0.0000  | 0.0000  | 0.0000 | 0.0000  | 0.0006  | 0.0000  | 0.0014  | 0.0000 | 0.0040   | 0.3050 | 0.6704 |
| Unidentified rumen bacterium RFN10                 | 0.0000  | 0.0000  | 0.0000  | 0.0000 | 0.0000  | 0.0008  | 0.0000  | 0.0022  | 0.0000 | 0.0077   | 0.3050 | 0.6704 |
| Uncultured bacterium-116                           | 0.1787  | 0.0849  | 0.2126  | 0.0000 | 0.5467  | 0.0960  | 0.0141  | 0.1863  | 0.0000 | 0.6748   | 0.3106 | 0.6704 |
| Uncultured bacterium-079                           | 20.9143 | 10.6751 | 30.1695 | 0.3323 | 90.4000 | 20.3719 | 10.0539 | 30.6412 | 0.0442 | 130.2267 | 0.3223 | 0.6704 |
| <i>Bacterium</i> NLAE-zl-G195                      | 0.0010  | 0.0000  | 0.0029  | 0.0000 | 0.0081  | 0.1052  | 0.0000  | 0.2483  | 0.0000 | 0.8160   | 0.3291 | 0.6704 |

|                                                |        |        |         |        |         |         |         |         |        |          |        |        |
|------------------------------------------------|--------|--------|---------|--------|---------|---------|---------|---------|--------|----------|--------|--------|
| <i>Lachnospira multipara</i>                   | 0.0004 | 0.0000 | 0.0012  | 0.0000 | 0.0035  | 0.0364  | 0.0000  | 0.0752  | 0.0000 | 0.2203   | 0.3291 | 0.6704 |
| <i>Uncultured organism-059</i>                 | 0.0006 | 0.0000 | 0.0017  | 0.0000 | 0.0049  | 0.0407  | 0.0000  | 0.0773  | 0.0000 | 0.2440   | 0.3291 | 0.6704 |
| <i>Uncultured Firmicutes bacterium-004</i>     | 0.0048 | 0.0000 | 0.0093  | 0.0000 | 0.0245  | 0.0080  | 0.0000  | 0.0299  | 0.0000 | 0.1119   | 0.3311 | 0.6704 |
| <i>Uncultured bacterium-117</i>                | 0.0020 | 0.0000 | 0.0045  | 0.0000 | 0.0129  | 0.0136  | 0.0000  | 0.0511  | 0.0000 | 0.1910   | 0.3311 | 0.6704 |
| {Unknown Genus} <i>Lachnospiraceae</i>         | 0.0175 | 0.0012 | 0.0424  | 0.0000 | 0.1220  | 0.0531  | 0.0000  | 0.1732  | 0.0000 | 0.6498   | 0.3425 | 0.6704 |
| <i>Uncultured bacterium-026</i>                | 0.3459 | 0.2671 | 0.3994  | 0.0000 | 10.2214 | 10.5365 | 0.9849  | 20.0375 | 0.0000 | 70.3397  | 0.3563 | 0.6704 |
| <i>Uncultured organism-003</i>                 | 0.6478 | 0.5173 | 0.6837  | 0.0000 | 10.9246 | 20.9672 | 10.5160 | 30.6858 | 0.0000 | 10.3173  | 0.3563 | 0.6704 |
| {Unknown Family} <i>Clostridiales</i>          | 0.0021 | 0.0000 | 0.0029  | 0.0000 | 0.0065  | 0.0030  | 0.0000  | 0.0092  | 0.0000 | 0.0342   | 0.3772 | 0.6704 |
| <i>Uncultured organism-058</i>                 | 0.0831 | 0.0034 | 0.1517  | 0.0000 | 0.3649  | 10.0257 | 0.0000  | 20.1091 | 0.0000 | 60.3184  | 0.3785 | 0.6704 |
| <i>Uncultured bacterium-108</i>                | 0.2401 | 0.0537 | 0.4394  | 0.0000 | 10.2774 | 0.1581  | 0.0058  | 0.3684  | 0.0000 | 10.3621  | 0.3820 | 0.6704 |
| <i>Uncultured bacterium-066</i>                | 0.0260 | 0.0147 | 0.0316  | 0.0032 | 0.0980  | 0.0306  | 0.0094  | 0.0545  | 0.0000 | 0.2011   | 0.3888 | 0.6704 |
| <i>Uncultured bacterium-001</i>                | 0.5878 | 0.1369 | 10.0007 | 0.0000 | 20.8928 | 0.8647  | 0.2052  | 0.9398  | 0.0038 | 20.4378  | 0.3934 | 0.6704 |
| <i>Uncultured bacterium-022</i>                | 0.2786 | 0.1083 | 0.3769  | 0.0139 | 10.1175 | 0.1641  | 0.0953  | 0.1884  | 0.0000 | 0.5505   | 0.3934 | 0.6704 |
| <i>Uncultured bacterium-056</i>                | 0.3810 | 0.1780 | 0.4665  | 0.0183 | 10.3715 | 0.7155  | 0.4924  | 0.9403  | 0.0000 | 30.6547  | 0.3934 | 0.6704 |
| <i>Uncultured bacterium-028</i>                | 0.7710 | 0.8046 | 0.4127  | 0.1372 | 10.4613 | 20.2817 | 10.3187 | 30.1771 | 0.0152 | 110.1256 | 0.3936 | 0.6704 |
| <i>Alistipes timonensis</i> JC136              | 0.0037 | 0.0000 | 0.0104  | 0.0000 | 0.0294  | 0.0530  | 0.0000  | 0.1291  | 0.0000 | 0.3741   | 0.4295 | 0.6704 |
| <i>Uncultured organism-006</i>                 | 0.0095 | 0.0094 | 0.0062  | 0.0000 | 0.0203  | 0.0977  | 0.0317  | 0.1375  | 0.0000 | 0.4796   | 0.4299 | 0.6704 |
| <i>Uncultured bacterium-031</i>                | 0.2615 | 0.1707 | 0.2158  | 0.0366 | 0.6101  | 0.2418  | 0.0549  | 0.2731  | 0.0098 | 0.8638   | 0.4325 | 0.6704 |
| <i>Uncultured organism-039</i>                 | 0.0178 | 0.0020 | 0.0243  | 0.0000 | 0.0533  | 0.0355  | 0.0000  | 0.0741  | 0.0000 | 0.2053   | 0.4330 | 0.6704 |
| <i>Uncultured bacterium-053</i>                | 0.0341 | 0.0000 | 0.0907  | 0.0000 | 0.2582  | 0.0008  | 0.0000  | 0.0022  | 0.0000 | 0.0076   | 0.4468 | 0.6704 |
| <i>Uncultured bacterium-104</i>                | 0.0737 | 0.0025 | 0.1943  | 0.0000 | 0.5542  | 0.0120  | 0.0000  | 0.0258  | 0.0000 | 0.0815   | 0.4519 | 0.6704 |
| <i>Uncultured bacterium-018</i>                | 0.0062 | 0.0063 | 0.0054  | 0.0000 | 0.0161  | 0.0263  | 0.0120  | 0.0359  | 0.0000 | 0.1161   | 0.4628 | 0.6704 |
| <i>Uncultured organism-012</i>                 | 0.0848 | 0.0403 | 0.1142  | 0.0224 | 0.3613  | 0.1159  | 0.0291  | 0.1728  | 0.0000 | 0.5772   | 0.4731 | 0.6704 |
| <i>Uncultured bacterium-023</i>                | 0.8507 | 0.8665 | 0.6191  | 0.0797 | 10.6699 | 0.7472  | 0.4651  | 0.8537  | 0.0000 | 20.6009  | 0.4736 | 0.6704 |
| <i>Uncultured bacterium-054</i>                | 0.3857 | 0.0599 | 0.8466  | 0.0046 | 20.4617 | 0.0495  | 0.0229  | 0.0659  | 0.0000 | 0.2346   | 0.4736 | 0.6704 |
| <i>Uncultured Clostridiaceae bacterium-001</i> | 0.0567 | 0.0029 | 0.1480  | 0.0000 | 0.4227  | 0.0693  | 0.0106  | 0.1855  | 0.0000 | 0.7057   | 0.4844 | 0.6704 |
| <i>Uncultured organism-018</i>                 | 0.0012 | 0.0000 | 0.0035  | 0.0000 | 0.0099  | 0.0018  | 0.0000  | 0.0037  | 0.0000 | 0.0132   | 0.4857 | 0.6704 |
| <i>Clostridium</i> sp. MDA2315                 | 0.0078 | 0.0000 | 0.0142  | 0.0000 | 0.0371  | 0.0205  | 0.0028  | 0.0432  | 0.0000 | 0.1600   | 0.5023 | 0.6704 |
| <i>Uncultured bacterium-004</i>                | 0.0167 | 0.0040 | 0.0328  | 0.0000 | 0.0952  | 0.0283  | 0.0000  | 0.0751  | 0.0000 | 0.2780   | 0.5023 | 0.6704 |
| <i>Anaerostipes butyraticus</i>                | 0.0000 | 0.0000 | 0.0000  | 0.0000 | 0.0000  | 0.0138  | 0.0000  | 0.0517  | 0.0000 | 0.1935   | 0.5083 | 0.6704 |
| <i>Bacillus</i> sp. SC156(2010)                | 0.0000 | 0.0000 | 0.0000  | 0.0000 | 0.0000  | 0.0003  | 0.0000  | 0.0011  | 0.0000 | 0.0040   | 0.5083 | 0.6704 |
| <i>Bacterium</i> NLAE-zl-G202                  | 0.0000 | 0.0000 | 0.0000  | 0.0000 | 0.0000  | 0.0012  | 0.0000  | 0.0045  | 0.0000 | 0.0167   | 0.5083 | 0.6704 |
| <i>Bacterium</i> mpn-isolate group 4           | 0.0000 | 0.0000 | 0.0000  | 0.0000 | 0.0000  | 0.0077  | 0.0000  | 0.0289  | 0.0000 | 0.1080   | 0.5083 | 0.6704 |

|                                                      |        |        |        |        |        |        |        |         |        |          |        |        |
|------------------------------------------------------|--------|--------|--------|--------|--------|--------|--------|---------|--------|----------|--------|--------|
| <i>Bacteroides finegoldii</i><br>CL09T03C10          | 0.0000 | 0.0000 | 0.0000 | 0.0000 | 0.0000 | 0.0225 | 0.0000 | 0.0841  | 0.0000 | 0.3146   | 0.5083 | 0.6704 |
| <i>Bacteroides fragilis</i><br>CL03T00C08            | 0.0000 | 0.0000 | 0.0000 | 0.0000 | 0.0000 | 0.1954 | 0.0000 | 0.7309  | 0.0000 | 20.7349  | 0.5083 | 0.6704 |
| <i>Bacteroides</i> sp. AP1                           | 0.0000 | 0.0000 | 0.0000 | 0.0000 | 0.0000 | 0.0005 | 0.0000 | 0.0019  | 0.0000 | 0.0072   | 0.5083 | 0.6704 |
| <i>Bifidobacterium scardovii</i>                     | 0.0000 | 0.0000 | 0.0000 | 0.0000 | 0.0000 | 0.0004 | 0.0000 | 0.0014  | 0.0000 | 0.0052   | 0.5083 | 0.6704 |
| <i>Campylobacter hominis</i>                         | 0.0000 | 0.0000 | 0.0000 | 0.0000 | 0.0000 | 0.0005 | 0.0000 | 0.0019  | 0.0000 | 0.0072   | 0.5083 | 0.6704 |
| <i>Campylobacter hominis</i><br>ATCC BAA-381         | 0.0000 | 0.0000 | 0.0000 | 0.0000 | 0.0000 | 0.0028 | 0.0000 | 0.0106  | 0.0000 | 0.0397   | 0.5083 | 0.6704 |
| <i>Campylobacter upsaliensis</i>                     | 0.0000 | 0.0000 | 0.0000 | 0.0000 | 0.0000 | 0.0454 | 0.0000 | 0.1699  | 0.0000 | 0.6358   | 0.5083 | 0.6704 |
| <i>Campylobacter upsaliensis</i> RM3195              | 0.0000 | 0.0000 | 0.0000 | 0.0000 | 0.0000 | 0.0556 | 0.0000 | 0.2079  | 0.0000 | 0.7780   | 0.5083 | 0.6704 |
| <i>Carnobacterium maltaromaticum</i> ATCC 35586      | 0.0000 | 0.0000 | 0.0000 | 0.0000 | 0.0000 | 0.0003 | 0.0000 | 0.0010  | 0.0000 | 0.0038   | 0.5083 | 0.6704 |
| <i>Citrobacter freundii</i> -001                     | 0.0000 | 0.0000 | 0.0000 | 0.0000 | 0.0000 | 0.8901 | 0.0000 | 30.3304 | 0.0000 | 120.4613 | 0.5083 | 0.6704 |
| <i>Clostridiaceae</i> bacterium WN011                | 0.0000 | 0.0000 | 0.0000 | 0.0000 | 0.0000 | 0.0066 | 0.0000 | 0.0249  | 0.0000 | 0.0930   | 0.5083 | 0.6704 |
| <i>Clostridiales</i> bacterium 27-5-10               | 0.0000 | 0.0000 | 0.0000 | 0.0000 | 0.0000 | 0.0005 | 0.0000 | 0.0019  | 0.0000 | 0.0072   | 0.5083 | 0.6704 |
| <i>Clostridiales</i> bacterium VE202-08              | 0.0000 | 0.0000 | 0.0000 | 0.0000 | 0.0000 | 0.0003 | 0.0000 | 0.0011  | 0.0000 | 0.0040   | 0.5083 | 0.6704 |
| <i>Clostridium clostridioforme</i> 90A4              | 0.0000 | 0.0000 | 0.0000 | 0.0000 | 0.0000 | 0.0004 | 0.0000 | 0.0014  | 0.0000 | 0.0052   | 0.5083 | 0.6704 |
| <i>Clostridium methoxybenzovorans</i> SR3            | 0.0000 | 0.0000 | 0.0000 | 0.0000 | 0.0000 | 0.0031 | 0.0000 | 0.0117  | 0.0000 | 0.0439   | 0.5083 | 0.6704 |
| <i>Clostridium nexile</i>                            | 0.0000 | 0.0000 | 0.0000 | 0.0000 | 0.0000 | 0.0041 | 0.0000 | 0.0153  | 0.0000 | 0.0571   | 0.5083 | 0.6704 |
| <i>Clostridium</i> sp. ID6                           | 0.0000 | 0.0000 | 0.0000 | 0.0000 | 0.0000 | 0.0044 | 0.0000 | 0.0163  | 0.0000 | 0.0609   | 0.5083 | 0.6704 |
| <i>Clostridium</i> sp. SL-2013-71                    | 0.0000 | 0.0000 | 0.0000 | 0.0000 | 0.0000 | 0.0004 | 0.0000 | 0.0014  | 0.0000 | 0.0052   | 0.5083 | 0.6704 |
| <i>Clostridium</i> sp. U201                          | 0.0000 | 0.0000 | 0.0000 | 0.0000 | 0.0000 | 0.0035 | 0.0000 | 0.0131  | 0.0000 | 0.0490   | 0.5083 | 0.6704 |
| <i>Coriobacteriaceae</i> bacterium JC110             | 0.0000 | 0.0000 | 0.0000 | 0.0000 | 0.0000 | 0.0003 | 0.0000 | 0.0010  | 0.0000 | 0.0038   | 0.5083 | 0.6704 |
| <i>Dialister</i> sp. oral taxon 502                  | 0.0000 | 0.0000 | 0.0000 | 0.0000 | 0.0000 | 0.0008 | 0.0000 | 0.0030  | 0.0000 | 0.0112   | 0.5083 | 0.6704 |
| <i>Enterobacter hormaechei</i> -001                  | 0.0000 | 0.0000 | 0.0000 | 0.0000 | 0.0000 | 0.0003 | 0.0000 | 0.0011  | 0.0000 | 0.0040   | 0.5083 | 0.6704 |
| <i>Enterobacter</i> sp. JN0513                       | 0.0000 | 0.0000 | 0.0000 | 0.0000 | 0.0000 | 0.4848 | 0.0000 | 10.8138 | 0.0000 | 60.7866  | 0.5083 | 0.6704 |
| <i>Enterobacter</i> sp. NAB3                         | 0.0000 | 0.0000 | 0.0000 | 0.0000 | 0.0000 | 0.0006 | 0.0000 | 0.0022  | 0.0000 | 0.0080   | 0.5083 | 0.6704 |
| <i>Enterobacter</i> sp. R4-368                       | 0.0000 | 0.0000 | 0.0000 | 0.0000 | 0.0000 | 0.0028 | 0.0000 | 0.0106  | 0.0000 | 0.0397   | 0.5083 | 0.6704 |
| <i>Enterococcus faecalis</i>                         | 0.0000 | 0.0000 | 0.0000 | 0.0000 | 0.0000 | 0.0005 | 0.0000 | 0.0019  | 0.0000 | 0.0072   | 0.5083 | 0.6704 |
| <i>Erysipelotrichaceae</i> bacterium 21_3            | 0.0000 | 0.0000 | 0.0000 | 0.0000 | 0.0000 | 0.0031 | 0.0000 | 0.0117  | 0.0000 | 0.0439   | 0.5083 | 0.6704 |
| <i>Eubacteriaceae</i> bacterium DJF_VR85             | 0.0000 | 0.0000 | 0.0000 | 0.0000 | 0.0000 | 0.0009 | 0.0000 | 0.0034  | 0.0000 | 0.0125   | 0.5083 | 0.6704 |
| <i>Holdemania massiliensis</i> AP2                   | 0.0000 | 0.0000 | 0.0000 | 0.0000 | 0.0000 | 0.0004 | 0.0000 | 0.0014  | 0.0000 | 0.0052   | 0.5083 | 0.6704 |
| <i>Human gut metagenome</i> -006                     | 0.0000 | 0.0000 | 0.0000 | 0.0000 | 0.0000 | 0.0004 | 0.0000 | 0.0014  | 0.0000 | 0.0052   | 0.5083 | 0.6704 |
| <i>Human gut metagenome</i> -016                     | 0.0000 | 0.0000 | 0.0000 | 0.0000 | 0.0000 | 0.0065 | 0.0000 | 0.0244  | 0.0000 | 0.0914   | 0.5083 | 0.6704 |
| <i>Klebsiella michiganensis</i>                      | 0.0000 | 0.0000 | 0.0000 | 0.0000 | 0.0000 | 0.0010 | 0.0000 | 0.0039  | 0.0000 | 0.0144   | 0.5083 | 0.6704 |
| <i>Klebsiella oxytoca</i>                            | 0.0000 | 0.0000 | 0.0000 | 0.0000 | 0.0000 | 0.0010 | 0.0000 | 0.0039  | 0.0000 | 0.0144   | 0.5083 | 0.6704 |
| <i>Klebsiella</i> sp. enrichment culture clone CL108 | 0.0000 | 0.0000 | 0.0000 | 0.0000 | 0.0000 | 0.1283 | 0.0000 | 0.4800  | 0.0000 | 10.7961  | 0.5083 | 0.6704 |
| <i>Lachnospiraceae</i> bacterium DJF_RR13            | 0.0000 | 0.0000 | 0.0000 | 0.0000 | 0.0000 | 0.0051 | 0.0000 | 0.0190  | 0.0000 | 0.0712   | 0.5083 | 0.6704 |
| <i>Lactobacillus acidophilus</i>                     | 0.0000 | 0.0000 | 0.0000 | 0.0000 | 0.0000 | 0.0129 | 0.0000 | 0.0483  | 0.0000 | 0.1806   | 0.5083 | 0.6704 |
| <i>Lactobacillus plantarum</i>                       | 0.0000 | 0.0000 | 0.0000 | 0.0000 | 0.0000 | 0.0011 | 0.0000 | 0.0041  | 0.0000 | 0.0155   | 0.5083 | 0.6704 |
| <i>Methanogenic archaeon</i> CH1270                  | 0.0000 | 0.0000 | 0.0000 | 0.0000 | 0.0000 | 0.0003 | 0.0000 | 0.0011  | 0.0000 | 0.0040   | 0.5083 | 0.6704 |
| <i>Methylobacterium</i> MAP-2                        | 0.0000 | 0.0000 | 0.0000 | 0.0000 | 0.0000 | 0.0005 | 0.0000 | 0.0020  | 0.0000 | 0.0076   | 0.5083 | 0.6704 |

|                                                                 |        |        |        |        |        |        |        |         |        |         |        |        |
|-----------------------------------------------------------------|--------|--------|--------|--------|--------|--------|--------|---------|--------|---------|--------|--------|
| <i>Paenibacillus</i> sp. 6M20                                   | 0.0000 | 0.0000 | 0.0000 | 0.0000 | 0.0000 | 0.0025 | 0.0000 | 0.0092  | 0.0000 | 0.0345  | 0.5083 | 0.6704 |
| <i>Paenibacillus</i> sp.<br>enrichment culture clone<br>ts0224R | 0.0000 | 0.0000 | 0.0000 | 0.0000 | 0.0000 | 0.0003 | 0.0000 | 0.0010  | 0.0000 | 0.0038  | 0.5083 | 0.6704 |
| <i>Pediococcus lolii</i>                                        | 0.0000 | 0.0000 | 0.0000 | 0.0000 | 0.0000 | 0.0011 | 0.0000 | 0.0041  | 0.0000 | 0.0155  | 0.5083 | 0.6704 |
| <i>Prevotella disiens</i> FB035-<br>09AN                        | 0.0000 | 0.0000 | 0.0000 | 0.0000 | 0.0000 | 0.0003 | 0.0000 | 0.0010  | 0.0000 | 0.0038  | 0.5083 | 0.6704 |
| <i>Prevotella marshallii</i>                                    | 0.0000 | 0.0000 | 0.0000 | 0.0000 | 0.0000 | 0.0383 | 0.0000 | 0.1435  | 0.0000 | 0.5368  | 0.5083 | 0.6704 |
| <i>Pseudomonas guineae</i>                                      | 0.0000 | 0.0000 | 0.0000 | 0.0000 | 0.0000 | 0.2673 | 0.0000 | 10.0000 | 0.0000 | 30.7418 | 0.5083 | 0.6704 |
| <i>Pseudomonas lundensis</i>                                    | 0.0000 | 0.0000 | 0.0000 | 0.0000 | 0.0000 | 0.0021 | 0.0000 | 0.0077  | 0.0000 | 0.0288  | 0.5083 | 0.6704 |
| <i>Pseudomonas</i> sp.<br>enrichment culture clone<br>IC1-46    | 0.0000 | 0.0000 | 0.0000 | 0.0000 | 0.0000 | 0.0014 | 0.0000 | 0.0051  | 0.0000 | 0.0192  | 0.5083 | 0.6704 |
| <i>Pseudomonas syringae</i>                                     | 0.0000 | 0.0000 | 0.0000 | 0.0000 | 0.0000 | 0.0008 | 0.0000 | 0.0031  | 0.0000 | 0.0115  | 0.5083 | 0.6704 |
| <i>Pseudomonas syringae</i><br>p0. tomato                       | 0.0000 | 0.0000 | 0.0000 | 0.0000 | 0.0000 | 0.0005 | 0.0000 | 0.0020  | 0.0000 | 0.0077  | 0.5083 | 0.6704 |
| <i>Ruminococcus gnavus</i><br>CC55_001C                         | 0.0000 | 0.0000 | 0.0000 | 0.0000 | 0.0000 | 0.0083 | 0.0000 | 0.0310  | 0.0000 | 0.1161  | 0.5083 | 0.6704 |
| <i>Ruminococcus</i> sp.<br>DJF_VR67                             | 0.0000 | 0.0000 | 0.0000 | 0.0000 | 0.0000 | 0.0012 | 0.0000 | 0.0044  | 0.0000 | 0.0166  | 0.5083 | 0.6704 |
| <i>Sphingomonas soli</i>                                        | 0.0000 | 0.0000 | 0.0000 | 0.0000 | 0.0000 | 0.0005 | 0.0000 | 0.0020  | 0.0000 | 0.0076  | 0.5083 | 0.6704 |
| <i>Sporosarcina<br/>psychrophila</i>                            | 0.0000 | 0.0000 | 0.0000 | 0.0000 | 0.0000 | 0.0009 | 0.0000 | 0.0032  | 0.0000 | 0.0121  | 0.5083 | 0.6704 |
| Uncultured<br><i>Enterobacteriaceae</i><br>bacterium-001        | 0.0000 | 0.0000 | 0.0000 | 0.0000 | 0.0000 | 0.0003 | 0.0000 | 0.0011  | 0.0000 | 0.0040  | 0.5083 | 0.6704 |
| Uncultured <i>Firmicutes</i><br>bacterium-001                   | 0.0000 | 0.0000 | 0.0000 | 0.0000 | 0.0000 | 0.0136 | 0.0000 | 0.0507  | 0.0000 | 0.1898  | 0.5083 | 0.6704 |
| Uncultured <i>Klebsiella</i> sp-<br>001                         | 0.0000 | 0.0000 | 0.0000 | 0.0000 | 0.0000 | 0.4856 | 0.0000 | 10.8170 | 0.0000 | 60.7987 | 0.5083 | 0.6704 |
| Uncultured <i>Lactobacillus</i><br>sp.                          | 0.0000 | 0.0000 | 0.0000 | 0.0000 | 0.0000 | 0.0024 | 0.0000 | 0.0090  | 0.0000 | 0.0335  | 0.5083 | 0.6704 |
| Uncultured <i>Mollicutes</i><br>bacterium                       | 0.0000 | 0.0000 | 0.0000 | 0.0000 | 0.0000 | 0.0194 | 0.0000 | 0.0725  | 0.0000 | 0.2713  | 0.5083 | 0.6704 |
| Uncultured<br><i>Oxalobacteraceae</i><br>bacterium              | 0.0000 | 0.0000 | 0.0000 | 0.0000 | 0.0000 | 0.0003 | 0.0000 | 0.0011  | 0.0000 | 0.0040  | 0.5083 | 0.6704 |
| Uncultured archaeon-001                                         | 0.0000 | 0.0000 | 0.0000 | 0.0000 | 0.0000 | 0.0009 | 0.0000 | 0.0034  | 0.0000 | 0.0125  | 0.5083 | 0.6704 |
| Uncultured archaeon-002                                         | 0.0000 | 0.0000 | 0.0000 | 0.0000 | 0.0000 | 0.0009 | 0.0000 | 0.0034  | 0.0000 | 0.0125  | 0.5083 | 0.6704 |
| Uncultured bacterium<br>adhufec350.25                           | 0.0000 | 0.0000 | 0.0000 | 0.0000 | 0.0000 | 0.0003 | 0.0000 | 0.0010  | 0.0000 | 0.0038  | 0.5083 | 0.6704 |
| Uncultured bacterium-<br>032                                    | 0.0000 | 0.0000 | 0.0000 | 0.0000 | 0.0000 | 0.0046 | 0.0000 | 0.0171  | 0.0000 | 0.0642  | 0.5083 | 0.6704 |
| Uncultured bacterium-<br>036                                    | 0.0000 | 0.0000 | 0.0000 | 0.0000 | 0.0000 | 0.0005 | 0.0000 | 0.0020  | 0.0000 | 0.0076  | 0.5083 | 0.6704 |
| Uncultured bacterium-<br>037                                    | 0.0000 | 0.0000 | 0.0000 | 0.0000 | 0.0000 | 0.0005 | 0.0000 | 0.0020  | 0.0000 | 0.0076  | 0.5083 | 0.6704 |
| Uncultured bacterium-<br>040                                    | 0.0000 | 0.0000 | 0.0000 | 0.0000 | 0.0000 | 0.0050 | 0.0000 | 0.0186  | 0.0000 | 0.0697  | 0.5083 | 0.6704 |
| Uncultured bacterium-<br>045                                    | 0.0000 | 0.0000 | 0.0000 | 0.0000 | 0.0000 | 0.0016 | 0.0000 | 0.0061  | 0.0000 | 0.0230  | 0.5083 | 0.6704 |
| Uncultured bacterium-<br>048                                    | 0.0000 | 0.0000 | 0.0000 | 0.0000 | 0.0000 | 0.1596 | 0.0000 | 0.5974  | 0.0000 | 20.2351 | 0.5083 | 0.6704 |
| Uncultured bacterium-<br>050                                    | 0.0000 | 0.0000 | 0.0000 | 0.0000 | 0.0000 | 0.0276 | 0.0000 | 0.1034  | 0.0000 | 0.3870  | 0.5083 | 0.6704 |
| Uncultured bacterium-<br>063                                    | 0.0000 | 0.0000 | 0.0000 | 0.0000 | 0.0000 | 0.0005 | 0.0000 | 0.0019  | 0.0000 | 0.0072  | 0.5083 | 0.6704 |
| Uncultured bacterium-<br>067                                    | 0.0000 | 0.0000 | 0.0000 | 0.0000 | 0.0000 | 0.0014 | 0.0000 | 0.0053  | 0.0000 | 0.0198  | 0.5083 | 0.6704 |
| Uncultured bacterium-<br>074                                    | 0.0000 | 0.0000 | 0.0000 | 0.0000 | 0.0000 | 0.0003 | 0.0000 | 0.0010  | 0.0000 | 0.0038  | 0.5083 | 0.6704 |
| Uncultured bacterium-<br>095                                    | 0.0000 | 0.0000 | 0.0000 | 0.0000 | 0.0000 | 0.0012 | 0.0000 | 0.0044  | 0.0000 | 0.0166  | 0.5083 | 0.6704 |

|                                              |        |        |        |        |        |        |        |         |        |         |        |        |
|----------------------------------------------|--------|--------|--------|--------|--------|--------|--------|---------|--------|---------|--------|--------|
| <i>Uncultured bacterium-109</i>              | 0.0000 | 0.0000 | 0.0000 | 0.0000 | 0.0000 | 0.0233 | 0.0000 | 0.0871  | 0.0000 | 0.3259  | 0.5083 | 0.6704 |
| <i>Uncultured bacterium-119</i>              | 0.0000 | 0.0000 | 0.0000 | 0.0000 | 0.0000 | 0.0003 | 0.0000 | 0.0011  | 0.0000 | 0.0040  | 0.5083 | 0.6704 |
| <i>Uncultured bacterium-122</i>              | 0.0000 | 0.0000 | 0.0000 | 0.0000 | 0.0000 | 0.0028 | 0.0000 | 0.0106  | 0.0000 | 0.0396  | 0.5083 | 0.6704 |
| <i>Uncultured bacterium-128</i>              | 0.0000 | 0.0000 | 0.0000 | 0.0000 | 0.0000 | 0.0008 | 0.0000 | 0.0032  | 0.0000 | 0.0119  | 0.5083 | 0.6704 |
| <i>Uncultured bacterium-129</i>              | 0.0000 | 0.0000 | 0.0000 | 0.0000 | 0.0000 | 0.0005 | 0.0000 | 0.0020  | 0.0000 | 0.0076  | 0.5083 | 0.6704 |
| <i>Uncultured bacterium-138</i>              | 0.0000 | 0.0000 | 0.0000 | 0.0000 | 0.0000 | 0.0011 | 0.0000 | 0.0041  | 0.0000 | 0.0153  | 0.5083 | 0.6704 |
| <i>Uncultured bacterium-141</i>              | 0.0000 | 0.0000 | 0.0000 | 0.0000 | 0.0000 | 0.0088 | 0.0000 | 0.0328  | 0.0000 | 0.1227  | 0.5083 | 0.6704 |
| <i>Uncultured bacterium-143</i>              | 0.0000 | 0.0000 | 0.0000 | 0.0000 | 0.0000 | 0.5380 | 0.0000 | 20.0132 | 0.0000 | 70.5327 | 0.5083 | 0.6704 |
| <i>Uncultured bacterium-150</i>              | 0.0000 | 0.0000 | 0.0000 | 0.0000 | 0.0000 | 0.4131 | 0.0000 | 10.5456 | 0.0000 | 50.7832 | 0.5083 | 0.6704 |
| <i>Uncultured bacterium-152</i>              | 0.0000 | 0.0000 | 0.0000 | 0.0000 | 0.0000 | 0.0003 | 0.0000 | 0.0011  | 0.0000 | 0.0043  | 0.5083 | 0.6704 |
| <i>Uncultured bacterium-156</i>              | 0.0000 | 0.0000 | 0.0000 | 0.0000 | 0.0000 | 0.0061 | 0.0000 | 0.0227  | 0.0000 | 0.0851  | 0.5083 | 0.6704 |
| <i>Uncultured beta proteobacterium</i>       | 0.0000 | 0.0000 | 0.0000 | 0.0000 | 0.0000 | 0.0012 | 0.0000 | 0.0044  | 0.0000 | 0.0166  | 0.5083 | 0.6704 |
| <i>Uncultured gamma proteobacterium</i>      | 0.0000 | 0.0000 | 0.0000 | 0.0000 | 0.0000 | 0.0080 | 0.0000 | 0.0299  | 0.0000 | 0.1119  | 0.5083 | 0.6704 |
| <i>Uncultured organism-009</i>               | 0.0000 | 0.0000 | 0.0000 | 0.0000 | 0.0000 | 0.0961 | 0.0000 | 0.3596  | 0.0000 | 10.3455 | 0.5083 | 0.6704 |
| <i>Uncultured organism-022</i>               | 0.0000 | 0.0000 | 0.0000 | 0.0000 | 0.0000 | 0.0059 | 0.0000 | 0.0220  | 0.0000 | 0.0824  | 0.5083 | 0.6704 |
| <i>Uncultured organism-026</i>               | 0.0000 | 0.0000 | 0.0000 | 0.0000 | 0.0000 | 0.0819 | 0.0000 | 0.3065  | 0.0000 | 10.1468 | 0.5083 | 0.6704 |
| <i>Uncultured organism-056</i>               | 0.0000 | 0.0000 | 0.0000 | 0.0000 | 0.0000 | 0.0005 | 0.0000 | 0.0020  | 0.0000 | 0.0076  | 0.5083 | 0.6704 |
| <i>Uncultured organism-057</i>               | 0.0000 | 0.0000 | 0.0000 | 0.0000 | 0.0000 | 0.0011 | 0.0000 | 0.0041  | 0.0000 | 0.0153  | 0.5083 | 0.6704 |
| <i>Uncultured organism-061</i>               | 0.0000 | 0.0000 | 0.0000 | 0.0000 | 0.0000 | 0.0011 | 0.0000 | 0.0042  | 0.0000 | 0.0158  | 0.5083 | 0.6704 |
| <i>Uncultured organism-064</i>               | 0.0000 | 0.0000 | 0.0000 | 0.0000 | 0.0000 | 0.0003 | 0.0000 | 0.0010  | 0.0000 | 0.0038  | 0.5083 | 0.6704 |
| <i>Uncultured organism-069</i>               | 0.0000 | 0.0000 | 0.0000 | 0.0000 | 0.0000 | 0.0003 | 0.0000 | 0.0010  | 0.0000 | 0.0038  | 0.5083 | 0.6704 |
| <i>Uncultured rumen bacterium-002</i>        | 0.0000 | 0.0000 | 0.0000 | 0.0000 | 0.0000 | 0.0089 | 0.0000 | 0.0333  | 0.0000 | 0.1246  | 0.5083 | 0.6704 |
| <i>Uncultured rumen bacterium-007</i>        | 0.0000 | 0.0000 | 0.0000 | 0.0000 | 0.0000 | 0.1177 | 0.0000 | 0.4405  | 0.0000 | 10.6481 | 0.5083 | 0.6704 |
| <i>Uncultured rumen bacterium-010</i>        | 0.0000 | 0.0000 | 0.0000 | 0.0000 | 0.0000 | 0.0008 | 0.0000 | 0.0030  | 0.0000 | 0.0113  | 0.5083 | 0.6704 |
| <i>Uncultured rumen bacterium-011</i>        | 0.0000 | 0.0000 | 0.0000 | 0.0000 | 0.0000 | 0.0006 | 0.0000 | 0.0021  | 0.0000 | 0.0079  | 0.5083 | 0.6704 |
| <i>Uncultured rumen bacterium-014</i>        | 0.0000 | 0.0000 | 0.0000 | 0.0000 | 0.0000 | 0.0160 | 0.0000 | 0.0599  | 0.0000 | 0.2243  | 0.5083 | 0.6704 |
| <i>Unidentified-007</i>                      | 0.0000 | 0.0000 | 0.0000 | 0.0000 | 0.0000 | 0.0003 | 0.0000 | 0.0011  | 0.0000 | 0.0040  | 0.5083 | 0.6704 |
| <i>Virgibacillus soli</i>                    | 0.0000 | 0.0000 | 0.0000 | 0.0000 | 0.0000 | 0.0005 | 0.0000 | 0.0020  | 0.0000 | 0.0077  | 0.5083 | 0.6704 |
| <i>Wallaby gut metagenome</i>                | 0.0000 | 0.0000 | 0.0000 | 0.0000 | 0.0000 | 0.0006 | 0.0000 | 0.0021  | 0.0000 | 0.0079  | 0.5083 | 0.6704 |
| <i>{Unknown Genus} Peptostreptococcaceae</i> | 0.0000 | 0.0000 | 0.0000 | 0.0000 | 0.0000 | 0.0009 | 0.0000 | 0.0034  | 0.0000 | 0.0125  | 0.5083 | 0.6704 |
| <i>{Unknown Species} Blautia</i>             | 0.0000 | 0.0000 | 0.0000 | 0.0000 | 0.0000 | 0.0068 | 0.0000 | 0.0254  | 0.0000 | 0.0950  | 0.5083 | 0.6704 |
| <i>{Unknown Species} Coprobacter</i>         | 0.0000 | 0.0000 | 0.0000 | 0.0000 | 0.0000 | 0.0003 | 0.0000 | 0.0011  | 0.0000 | 0.0040  | 0.5083 | 0.6704 |
| <i>{Unknown Species} Incertae Sedis</i>      | 0.0000 | 0.0000 | 0.0000 | 0.0000 | 0.0000 | 0.0225 | 0.0000 | 0.0841  | 0.0000 | 0.3148  | 0.5083 | 0.6704 |

|                                                    |          |          |         |         |          |          |         |         |        |          |        |        |
|----------------------------------------------------|----------|----------|---------|---------|----------|----------|---------|---------|--------|----------|--------|--------|
| <i>{Unknown Species}</i><br><i>Uncultured-001</i>  | 0.0000   | 0.0000   | 0.0000  | 0.0000  | 0.0000   | 0.0003   | 0.0000  | 0.0010  | 0.0000 | 0.0038   | 0.5083 | 0.6704 |
| <i>{Unknown Species}</i><br><i>Uncultured-002</i>  | 0.0000   | 0.0000   | 0.0000  | 0.0000  | 0.0000   | 0.0003   | 0.0000  | 0.0011  | 0.0000 | 0.0040   | 0.5083 | 0.6704 |
| <i>Uncultured Clostridium</i><br><i>sp</i>         | 0.0038   | 0.0000   | 0.0087  | 0.0000  | 0.0249   | 0.0015   | 0.0000  | 0.0044  | 0.0000 | 0.0161   | 0.5097 | 0.6704 |
| <i>Uncultured bacterium-</i><br><i>093</i>         | 0.0047   | 0.0000   | 0.0114  | 0.0000  | 0.0325   | 0.0017   | 0.0000  | 0.0053  | 0.0000 | 0.0197   | 0.5097 | 0.6704 |
| <i>Uncultured organism-</i><br><i>051</i>          | 0.0530   | 0.0199   | 0.0831  | 0.0000  | 0.2470   | 0.0274   | 0.0064  | 0.0416  | 0.0000 | 0.1225   | 0.5125 | 0.6704 |
| <i>Bacterium NLAE-zl-</i><br><i>C532</i>           | 0.0219   | 0.0020   | 0.0537  | 0.0000  | 0.1546   | 0.0080   | 0.0000  | 0.0209  | 0.0000 | 0.0791   | 0.5151 | 0.6704 |
| <i>Uncultured bacterium-</i><br><i>014</i>         | 0.0113   | 0.0023   | 0.0147  | 0.0000  | 0.0353   | 0.0069   | 0.0000  | 0.0121  | 0.0000 | 0.0397   | 0.5151 | 0.6704 |
| <i>Uncultured bacterium-</i><br><i>009</i>         | 0.3248   | 0.1851   | 0.3303  | 0.0670  | 0.9825   | 0.3910   | 0.2771  | 0.3589  | 0.0000 | 10.2784  | 0.5167 | 0.6704 |
| <i>Uncultured bacterium-</i><br><i>015</i>         | 140.2845 | 140.6608 | 10.7147 | 20.3581 | 30.1222  | 110.4793 | 90.3120 | 80.8311 | 0.1884 | 30.4562  | 0.5167 | 0.6704 |
| <i>Uncultured bacterium-</i><br><i>111</i>         | 0.4611   | 0.4592   | 0.3652  | 0.0046  | 0.9576   | 0.3325   | 0.2469  | 0.2687  | 0.0000 | 0.7653   | 0.5167 | 0.6704 |
| <i>Uncultured organism-</i><br><i>046</i>          | 0.1808   | 0.1676   | 0.1510  | 0.0056  | 0.5097   | 0.6413   | 0.2194  | 10.0366 | 0.0000 | 30.2475  | 0.5167 | 0.6704 |
| <i>Uncultured bacterium-</i><br><i>020</i>         | 0.3965   | 0.0355   | 0.9951  | 0.0000  | 20.8551  | 0.4785   | 0.0933  | 0.8634  | 0.0000 | 30.0755  | 0.5389 | 0.6912 |
| <i>Uncultured organism-</i><br><i>005</i>          | 0.0195   | 0.0028   | 0.0335  | 0.0000  | 0.0874   | 0.0292   | 0.0143  | 0.0427  | 0.0000 | 0.1425   | 0.5424 | 0.6912 |
| <i>Uncultured</i><br><i>Bifidobacterium sp. 9A</i> | 0.0007   | 0.0000   | 0.0020  | 0.0000  | 0.0056   | 0.0196   | 0.0000  | 0.0443  | 0.0000 | 0.1316   | 0.5428 | 0.6912 |
| <i>Uncultured bacterium-</i><br><i>013</i>         | 0.0004   | 0.0000   | 0.0011  | 0.0000  | 0.0032   | 0.0327   | 0.0000  | 0.1150  | 0.0000 | 0.4319   | 0.5428 | 0.6912 |
| <i>Uncultured bacterium-</i><br><i>029</i>         | 0.0020   | 0.0000   | 0.0058  | 0.0000  | 0.0163   | 0.0121   | 0.0000  | 0.0252  | 0.0000 | 0.0704   | 0.5428 | 0.6912 |
| <i>Uncultured bacterium-</i><br><i>103</i>         | 0.0008   | 0.0000   | 0.0023  | 0.0000  | 0.0064   | 0.0269   | 0.0000  | 0.0687  | 0.0000 | 0.2308   | 0.5428 | 0.6912 |
| <i>Uncultured bacterium-</i><br><i>090</i>         | 0.1390   | 0.0290   | 0.1919  | 0.0000  | 0.5182   | 0.1973   | 0.0038  | 0.3905  | 0.0000 | 10.2528  | 0.5479 | 0.6955 |
| <i>Uncultured organism-</i><br><i>032</i>          | 0.0276   | 0.0000   | 0.0641  | 0.0000  | 0.1848   | 0.0823   | 0.0019  | 0.1605  | 0.0000 | 0.5078   | 0.5510 | 0.6972 |
| <i>Human gut metagenome-</i><br><i>008</i>         | 0.0660   | 0.0151   | 0.0887  | 0.0000  | 0.2231   | 0.0755   | 0.0383  | 0.1121  | 0.0000 | 0.4089   | 0.5555 | 0.7008 |
| <i>Uncultured bacterium-</i><br><i>088</i>         | 0.9984   | 0.1637   | 20.2564 | 0.0035  | 60.5612  | 0.7676   | 0.2340  | 10.3810 | 0.0000 | 50.1667  | 0.5617 | 0.7064 |
| <i>Ruminococcus bromii L2-</i><br><i>63</i>        | 0.0471   | 0.0000   | 0.0839  | 0.0000  | 0.2325   | 0.2481   | 0.0000  | 0.4252  | 0.0000 | 10.1189  | 0.5658 | 0.7094 |
| <i>Uncultured</i><br><i>Faecalibacterium sp</i>    | 0.0039   | 0.0000   | 0.0098  | 0.0000  | 0.0280   | 0.0009   | 0.0000  | 0.0024  | 0.0000 | 0.0075   | 0.5770 | 0.7168 |
| <i>Uncultured bacterium-</i><br><i>064</i>         | 0.0015   | 0.0000   | 0.0029  | 0.0000  | 0.0075   | 0.0029   | 0.0000  | 0.0096  | 0.0000 | 0.0361   | 0.5770 | 0.7168 |
| <i>Uncultured bacterium-</i><br><i>144</i>         | 0.0315   | 0.0000   | 0.0877  | 0.0000  | 0.2486   | 0.0086   | 0.0000  | 0.0310  | 0.0000 | 0.1161   | 0.5770 | 0.7168 |
| <i>Uncultured bacterium-</i><br><i>107</i>         | 0.0140   | 0.0000   | 0.0373  | 0.0000  | 0.1060   | 0.7929   | 0.0000  | 20.2213 | 0.0000 | 70.9589  | 0.5916 | 0.7306 |
| <i>Uncultured bacterium-</i><br><i>145</i>         | 0.2272   | 0.0000   | 0.6302  | 0.0000  | 10.7868  | 0.2017   | 0.0000  | 0.5245  | 0.0000 | 10.7386  | 0.5916 | 0.7306 |
| <i>Fusicatenibacter</i><br><i>saccharivorans</i>   | 0.0586   | 0.0117   | 0.1027  | 0.0000  | 0.2940   | 0.0513   | 0.0364  | 0.0607  | 0.0000 | 0.2310   | 0.6067 | 0.7470 |
| <i>Uncultured bacterium-</i><br><i>092</i>         | 60.2430  | 50.5057  | 40.5705 | 0.4452  | 120.3443 | 70.0643  | 60.0154 | 40.9734 | 0.0103 | 150.6916 | 0.6087 | 0.7472 |
| <i>Gut metagenome-001</i>                          | 0.0009   | 0.0000   | 0.0018  | 0.0000  | 0.0049   | 0.0095   | 0.0000  | 0.0196  | 0.0000 | 0.0653   | 0.6325 | 0.7740 |
| <i>Uncultured bacterium-</i><br><i>115</i>         | 0.0123   | 0.0000   | 0.0332  | 0.0000  | 0.0943   | 0.0089   | 0.0000  | 0.0304  | 0.0000 | 0.1142   | 0.6481 | 0.7906 |
| <i>Uncultured rumen</i><br><i>bacterium-012</i>    | 0.0182   | 0.0000   | 0.0506  | 0.0000  | 0.1434   | 0.0226   | 0.0000  | 0.0414  | 0.0000 | 0.1247   | 0.6499 | 0.7906 |
| <i>Bacteroides coprophilus</i>                     | 0.0105   | 0.0000   | 0.0296  | 0.0000  | 0.0839   | 0.0053   | 0.0000  | 0.0200  | 0.0000 | 0.0748   | 0.6816 | 0.8001 |

|                                                                  |         |         |         |         |          |         |         |         |         |          |        |        |
|------------------------------------------------------------------|---------|---------|---------|---------|----------|---------|---------|---------|---------|----------|--------|--------|
| <i>Bacteroides nordii</i><br>CL02T12C05                          | 0.0005  | 0.0000  | 0.0014  | 0.0000  | 0.0041   | 0.0003  | 0.0000  | 0.0011  | 0.0000  | 0.0040   | 0.6816 | 0.8001 |
| <i>Lactococcus lactis</i> subsp.<br><i>cremoris</i> TIFN7        | 0.0043  | 0.0000  | 0.0122  | 0.0000  | 0.0346   | 0.0003  | 0.0000  | 0.0010  | 0.0000  | 0.0038   | 0.6816 | 0.8001 |
| <i>Lactococcus lactis</i> subsp.<br><i>lactis</i>                | 0.0051  | 0.0000  | 0.0144  | 0.0000  | 0.0407   | 0.0004  | 0.0000  | 0.0014  | 0.0000  | 0.0052   | 0.6816 | 0.8001 |
| Uncultured<br><i>Parabacteroides</i> sp                          | 0.1436  | 0.0000  | 0.4061  | 0.0000  | 10.1485  | 0.0006  | 0.0000  | 0.0022  | 0.0000  | 0.0080   | 0.6816 | 0.8001 |
| Uncultured<br><i>Thermoanaerobacteriales</i><br><i>bacterium</i> | 0.0275  | 0.0000  | 0.0777  | 0.0000  | 0.2199   | 0.0005  | 0.0000  | 0.0019  | 0.0000  | 0.0072   | 0.6816 | 0.8001 |
| Uncultured bacterium-<br>068                                     | 0.0035  | 0.0000  | 0.0098  | 0.0000  | 0.0277   | 0.0003  | 0.0000  | 0.0010  | 0.0000  | 0.0038   | 0.6816 | 0.8001 |
| Uncultured bacterium-<br>105                                     | 0.0146  | 0.0000  | 0.0412  | 0.0000  | 0.1165   | 0.0063  | 0.0000  | 0.0234  | 0.0000  | 0.0876   | 0.6816 | 0.8001 |
| Uncultured organism-<br>019                                      | 0.0075  | 0.0000  | 0.0212  | 0.0000  | 0.0600   | 0.0037  | 0.0000  | 0.0138  | 0.0000  | 0.0516   | 0.6816 | 0.8001 |
| Uncultured organism-<br>062                                      | 0.1075  | 0.0000  | 0.3040  | 0.0000  | 0.8599   | 0.0089  | 0.0000  | 0.0333  | 0.0000  | 0.1247   | 0.6816 | 0.8001 |
| Uncultured organism-<br>067                                      | 0.0020  | 0.0000  | 0.0056  | 0.0000  | 0.0159   | 0.0006  | 0.0000  | 0.0022  | 0.0000  | 0.0080   | 0.6816 | 0.8001 |
| Uncultured rumen<br>bacterium-005                                | 0.0006  | 0.0000  | 0.0016  | 0.0000  | 0.0046   | 0.0003  | 0.0000  | 0.0010  | 0.0000  | 0.0038   | 0.6816 | 0.8001 |
| <i>Bacteroides plebeius</i><br>DSM 17135                         | 0.0073  | 0.0000  | 0.0205  | 0.0000  | 0.0581   | 0.0123  | 0.0000  | 0.0263  | 0.0000  | 0.0851   | 0.6850 | 0.8001 |
| Uncultured organism-<br>044                                      | 0.0117  | 0.0000  | 0.0330  | 0.0000  | 0.0934   | 0.0167  | 0.0000  | 0.0557  | 0.0000  | 0.2091   | 0.6850 | 0.8001 |
| Uncultured bacterium-<br>157                                     | 0.0080  | 0.0000  | 0.0204  | 0.0000  | 0.0582   | 0.0807  | 0.0000  | 0.1680  | 0.0000  | 0.4700   | 0.6956 | 0.8078 |
| <i>Parabacteroides merdae</i>                                    | 0.0288  | 0.0233  | 0.0312  | 0.0000  | 0.0858   | 0.0472  | 0.0094  | 0.1020  | 0.0000  | 0.3785   | 0.6974 | 0.8078 |
| Uncultured organism-<br>034                                      | 0.1721  | 0.0180  | 0.2750  | 0.0000  | 0.7714   | 0.0909  | 0.0258  | 0.1525  | 0.0000  | 0.5691   | 0.6974 | 0.8078 |
| <i>Alistipes</i> sp. AP11                                        | 0.0015  | 0.0000  | 0.0034  | 0.0000  | 0.0096   | 0.0076  | 0.0000  | 0.0192  | 0.0000  | 0.0543   | 0.7226 | 0.8322 |
| Human gut metagenome-<br>009                                     | 0.0220  | 0.0000  | 0.0499  | 0.0000  | 0.1418   | 0.0689  | 0.0000  | 0.2034  | 0.0000  | 0.7459   | 0.7226 | 0.8322 |
| Human gut metagenome-<br>011                                     | 0.1348  | 0.0036  | 0.2442  | 0.0000  | 0.6151   | 0.2717  | 0.0386  | 0.7821  | 0.0000  | 20.9736  | 0.7266 | 0.8345 |
| <i>Bacteroides vulgatus</i>                                      | 0.2692  | 0.2807  | 0.1974  | 0.0000  | 0.5122   | 0.4329  | 0.2146  | 0.5274  | 0.0000  | 10.3616  | 0.7303 | 0.8364 |
| Uncultured organism-<br>060                                      | 0.0345  | 0.0000  | 0.0706  | 0.0000  | 0.2043   | 0.1732  | 0.0000  | 0.3440  | 0.0000  | 10.0175  | 0.7515 | 0.8441 |
| Uncultured bacterium-<br>002                                     | 0.0403  | 0.0277  | 0.0487  | 0.0000  | 0.1468   | 0.1093  | 0.0157  | 0.2293  | 0.0000  | 0.8420   | 0.7530 | 0.8441 |
| Human gut metagenome-<br>012                                     | 0.4089  | 0.0770  | 0.7088  | 0.0000  | 20.0578  | 0.3685  | 0.0595  | 0.6563  | 0.0000  | 10.9417  | 0.7564 | 0.8441 |
| Uncultured bacterium-<br>083                                     | 70.4253 | 60.4643 | 30.5033 | 30.0063 | 130.5151 | 60.5093 | 60.4031 | 30.2755 | 10.5558 | 110.2253 | 0.7587 | 0.8441 |
| <i>Bifidobacterium bifidum</i><br>NCIMB 41171                    | 0.0167  | 0.0000  | 0.0474  | 0.0000  | 0.1340   | 0.0049  | 0.0000  | 0.0111  | 0.0000  | 0.0335   | 0.7609 | 0.8441 |
| Uncultured bacterium-<br>047                                     | 0.0191  | 0.0000  | 0.0539  | 0.0000  | 0.1525   | 0.0075  | 0.0000  | 0.0188  | 0.0000  | 0.0684   | 0.7609 | 0.8441 |
| Uncultured organism-<br>010                                      | 0.0062  | 0.0000  | 0.0175  | 0.0000  | 0.0494   | 0.0032  | 0.0000  | 0.0089  | 0.0000  | 0.0332   | 0.7609 | 0.8441 |
| Human gut metagenome-<br>005                                     | 0.2513  | 0.0051  | 0.5694  | 0.0000  | 10.6353  | 0.1160  | 0.0125  | 0.2525  | 0.0000  | 0.9169   | 0.7743 | 0.8441 |
| Uncultured<br><i>Ruminococcaceae</i><br>bacterium                | 0.0271  | 0.0041  | 0.0418  | 0.0000  | 0.1181   | 0.0973  | 0.0083  | 0.2839  | 0.0000  | 10.0738  | 0.7743 | 0.8441 |
| <i>Bifidobacterium</i><br><i>catenulatum</i>                     | 0.0023  | 0.0000  | 0.0064  | 0.0000  | 0.0182   | 0.0017  | 0.0000  | 0.0064  | 0.0000  | 0.0241   | 0.7844 | 0.8441 |
| <i>Butyrate-producing</i><br>bacterium SM4/1                     | 0.0015  | 0.0000  | 0.0043  | 0.0000  | 0.0123   | 0.0061  | 0.0000  | 0.0228  | 0.0000  | 0.0851   | 0.7844 | 0.8441 |
| <i>Citrobacter freundii</i> -002                                 | 0.0030  | 0.0000  | 0.0086  | 0.0000  | 0.0244   | 0.4241  | 0.0000  | 10.5870 | 0.0000  | 50.9381  | 0.7844 | 0.8441 |
| <i>Coriobacteriaceae</i><br>bacterium WAL 18889                  | 0.0004  | 0.0000  | 0.0012  | 0.0000  | 0.0035   | 0.0030  | 0.0000  | 0.0111  | 0.0000  | 0.0415   | 0.7844 | 0.8441 |

|                                                |         |         |         |         |          |         |         |         |        |          |        |        |
|------------------------------------------------|---------|---------|---------|---------|----------|---------|---------|---------|--------|----------|--------|--------|
| <i>Dorea formicigenerans</i><br>ATCC 27755     | 0.0006  | 0.0000  | 0.0017  | 0.0000  | 0.0049   | 0.0012  | 0.0000  | 0.0044  | 0.0000 | 0.0166   | 0.7844 | 0.8441 |
| <i>Slackia</i> sp. NATTS                       | 0.0004  | 0.0000  | 0.0011  | 0.0000  | 0.0032   | 0.0166  | 0.0000  | 0.0622  | 0.0000 | 0.2326   | 0.7844 | 0.8441 |
| Uncultured Bacteroidales<br>bacterium-001      | 0.0213  | 0.0000  | 0.0602  | 0.0000  | 0.1704   | 0.0741  | 0.0000  | 0.2772  | 0.0000 | 10.0370  | 0.7844 | 0.8441 |
| Uncultured Clostridiales<br>bacterium-004      | 0.0305  | 0.0000  | 0.0862  | 0.0000  | 0.2438   | 0.0209  | 0.0000  | 0.0783  | 0.0000 | 0.2928   | 0.7844 | 0.8441 |
| Uncultured bacterium-<br>055                   | 0.0004  | 0.0000  | 0.0011  | 0.0000  | 0.0032   | 0.0006  | 0.0000  | 0.0022  | 0.0000 | 0.0080   | 0.7844 | 0.8441 |
| Uncultured bacterium-<br>084                   | 0.0004  | 0.0000  | 0.0011  | 0.0000  | 0.0032   | 0.0003  | 0.0000  | 0.0010  | 0.0000 | 0.0038   | 0.7844 | 0.8441 |
| Uncultured bacterium-<br>125                   | 0.0003  | 0.0000  | 0.0008  | 0.0000  | 0.0024   | 0.0009  | 0.0000  | 0.0034  | 0.0000 | 0.0125   | 0.7844 | 0.8441 |
| Uncultured bacterium-<br>147                   | 0.0005  | 0.0000  | 0.0014  | 0.0000  | 0.0041   | 0.4491  | 0.0000  | 10.6805 | 0.0000 | 60.2880  | 0.7844 | 0.8441 |
| Uncultured organism-<br>068                    | 0.0013  | 0.0000  | 0.0037  | 0.0000  | 0.0106   | 0.0095  | 0.0000  | 0.0354  | 0.0000 | 0.1326   | 0.7844 | 0.8441 |
| {Unknown Class}<br>Firmicutes                  | 0.0004  | 0.0000  | 0.0011  | 0.0000  | 0.0032   | 0.0003  | 0.0000  | 0.0011  | 0.0000 | 0.0043   | 0.7844 | 0.8441 |
| <i>Escherichia coli</i>                        | 30.4217 | 0.0023  | 90.5343 | 0.0000  | 270.0160 | 0.2326  | 0.0000  | 0.7372  | 0.0000 | 20.7790  | 0.7942 | 0.8524 |
| <i>Bacteroides ovatus</i><br>CL02T12C04        | 0.0515  | 0.0091  | 0.1240  | 0.0000  | 0.3580   | 0.2456  | 0.0137  | 0.5138  | 0.0000 | 10.8153  | 0.8082 | 0.8652 |
| Uncultured organism-<br>016                    | 0.0127  | 0.0000  | 0.0336  | 0.0000  | 0.0956   | 0.0058  | 0.0000  | 0.0145  | 0.0000 | 0.0490   | 0.8163 | 0.8715 |
| Human gut metagenome-<br>014                   | 0.1444  | 0.0616  | 0.1775  | 0.0000  | 0.5041   | 0.4010  | 0.0386  | 0.8761  | 0.0000 | 30.1561  | 0.8638 | 0.9065 |
| Uncultured organism-<br>040                    | 0.1457  | 0.1015  | 0.1317  | 0.0000  | 0.3396   | 0.1600  | 0.0777  | 0.1957  | 0.0000 | 0.6063   | 0.8638 | 0.9065 |
| Uncultured bacterium-<br>151                   | 0.0009  | 0.0000  | 0.0025  | 0.0000  | 0.0071   | 0.0165  | 0.0000  | 0.0559  | 0.0000 | 0.2097   | 0.8638 | 0.9065 |
| Uncultured bacterium-<br>072                   | 0.3698  | 0.3256  | 0.1996  | 0.0756  | 0.6552   | 0.4351  | 0.3437  | 0.4565  | 0.0000 | 10.4642  | 0.8645 | 0.9065 |
| Uncultured bacterium-<br>102                   | 30.5033 | 30.3674 | 10.5187 | 10.4416 | 60.3305  | 40.4838 | 20.7213 | 40.5730 | 0.3298 | 150.1725 | 0.8645 | 0.9065 |
| Uncultured organism-<br>002                    | 40.4816 | 40.1118 | 30.8750 | 0.6607  | 10.6480  | 60.7463 | 40.4352 | 70.5390 | 0.0166 | 230.7757 | 0.8645 | 0.9065 |
| Uncultured organism-<br>031                    | 0.9982  | 0.9631  | 0.6206  | 0.2015  | 10.8315  | 10.5140 | 0.7286  | 20.0064 | 0.0583 | 70.2688  | 0.8645 | 0.9065 |
| Uncultured bacterium-<br>061                   | 0.0087  | 0.0048  | 0.0136  | 0.0000  | 0.0405   | 0.0100  | 0.0071  | 0.0118  | 0.0000 | 0.0344   | 0.9156 | 0.9573 |
| Uncultured bacterium-<br>136                   | 0.1572  | 0.0399  | 0.2927  | 0.0000  | 0.8593   | 0.2097  | 0.0120  | 0.4344  | 0.0000 | 10.5090  | 0.9176 | 0.9573 |
| <i>Bifidobacterium longum</i><br>subsp. longum | 0.1762  | 0.0330  | 0.3855  | 0.0000  | 10.1229  | 0.2533  | 0.0189  | 0.6268  | 0.0000 | 20.3427  | 0.9442 | 0.9728 |
| <i>Achromobacter</i><br>xylosoxidans           | 0.0341  | 0.0000  | 0.0963  | 0.0000  | 0.2724   | 0.0238  | 0.0000  | 0.0694  | 0.0000 | 0.2534   | 0.9544 | 0.9728 |
| <i>Bacteroides salyersiae</i><br>CL02T12C01    | 0.1508  | 0.0000  | 0.4264  | 0.0000  | 10.2062  | 0.0479  | 0.0000  | 0.1531  | 0.0000 | 0.5718   | 0.9544 | 0.9728 |
| <i>Blautia stercoris</i>                       | 0.0021  | 0.0000  | 0.0059  | 0.0000  | 0.0168   | 0.0020  | 0.0000  | 0.0062  | 0.0000 | 0.0231   | 0.9544 | 0.9728 |
| <i>Oscillospiraceae</i><br>bacterium VE202-24  | 0.0030  | 0.0000  | 0.0086  | 0.0000  | 0.0244   | 0.0008  | 0.0000  | 0.0022  | 0.0000 | 0.0076   | 0.9544 | 0.9728 |
| Uncultured bacterium-<br>042                   | 0.0156  | 0.0000  | 0.0442  | 0.0000  | 0.1251   | 0.0142  | 0.0000  | 0.0458  | 0.0000 | 0.1711   | 0.9544 | 0.9728 |
| Uncultured bacterium-<br>124                   | 0.0006  | 0.0000  | 0.0017  | 0.0000  | 0.0049   | 0.1509  | 0.0000  | 0.5635  | 0.0000 | 20.1086  | 0.9544 | 0.9728 |
| Uncultured bacterium-<br>137                   | 0.0010  | 0.0000  | 0.0029  | 0.0000  | 0.0081   | 0.1314  | 0.0000  | 0.4906  | 0.0000 | 10.8359  | 0.9544 | 0.9728 |
| {Unknown Genus}<br>Ruminococcaceae             | 0.0125  | 0.0000  | 0.0353  | 0.0000  | 0.0997   | 0.0088  | 0.0000  | 0.0318  | 0.0000 | 0.1191   | 0.9544 | 0.9728 |
| <i>Bacteroides</i> sp. DSM<br>12148            | 0.0024  | 0.0000  | 0.0057  | 0.0000  | 0.0163   | 0.0029  | 0.0000  | 0.0071  | 0.0000 | 0.0251   | 0.9629 | 0.9728 |
| Uncultured organism-<br>008                    | 0.0016  | 0.0000  | 0.0037  | 0.0000  | 0.0106   | 0.0038  | 0.0000  | 0.0102  | 0.0000 | 0.0377   | 0.9629 | 0.9728 |



[illegible]



[illegible]

[illegible]

|                                             |        |        |        |        |        |        |        |        |        |        |        |    |    |
|---------------------------------------------|--------|--------|--------|--------|--------|--------|--------|--------|--------|--------|--------|----|----|
| <i>Uncultured rumen bacterium-008</i>       | 0.0000 | 0.0000 | 0.0000 | 0.0000 | 0.0000 | 0.0000 | 0.0000 | 0.0000 | 0.0000 | 0.0000 | 0.0000 | NA | NA |
| <i>Uncultured rumen bacterium-009</i>       | 0.0000 | 0.0000 | 0.0000 | 0.0000 | 0.0000 | 0.0000 | 0.0000 | 0.0000 | 0.0000 | 0.0000 | 0.0000 | NA | NA |
| <i>Uncultured rumen bacterium-013</i>       | 0.0000 | 0.0000 | 0.0000 | 0.0000 | 0.0000 | 0.0000 | 0.0000 | 0.0000 | 0.0000 | 0.0000 | 0.0000 | NA | NA |
| <i>Unidentified marine bacterioplankton</i> | 0.0000 | 0.0000 | 0.0000 | 0.0000 | 0.0000 | 0.0000 | 0.0000 | 0.0000 | 0.0000 | 0.0000 | 0.0000 | NA | NA |
| <i>Unidentified-001</i>                     | 0.0000 | 0.0000 | 0.0000 | 0.0000 | 0.0000 | 0.0000 | 0.0000 | 0.0000 | 0.0000 | 0.0000 | 0.0000 | NA | NA |
| <i>Unidentified-003</i>                     | 0.0000 | 0.0000 | 0.0000 | 0.0000 | 0.0000 | 0.0000 | 0.0000 | 0.0000 | 0.0000 | 0.0000 | 0.0000 | NA | NA |
| <i>Unidentified-005</i>                     | 0.0000 | 0.0000 | 0.0000 | 0.0000 | 0.0000 | 0.0000 | 0.0000 | 0.0000 | 0.0000 | 0.0000 | 0.0000 | NA | NA |
| <i>Veillonella</i> sp. oral clone VeillF3   | 0.0000 | 0.0000 | 0.0000 | 0.0000 | 0.0000 | 0.0000 | 0.0000 | 0.0000 | 0.0000 | 0.0000 | 0.0000 | NA | NA |
| <i>Victivallis vadensis</i>                 | 0.0000 | 0.0000 | 0.0000 | 0.0000 | 0.0000 | 0.0000 | 0.0000 | 0.0000 | 0.0000 | 0.0000 | 0.0000 | NA | NA |
| {Unknown Genus} <i>Porphyromonadaceae</i>   | 0.0000 | 0.0000 | 0.0000 | 0.0000 | 0.0000 | 0.0000 | 0.0000 | 0.0000 | 0.0000 | 0.0000 | 0.0000 | NA | NA |
| {Unknown Genus} <i>Puniceicoccaceae</i>     | 0.0000 | 0.0000 | 0.0000 | 0.0000 | 0.0000 | 0.0000 | 0.0000 | 0.0000 | 0.0000 | 0.0000 | 0.0000 | NA | NA |
| {Unknown Species} <i>Alistipes</i>          | 0.0000 | 0.0000 | 0.0000 | 0.0000 | 0.0000 | 0.0000 | 0.0000 | 0.0000 | 0.0000 | 0.0000 | 0.0000 | NA | NA |
| {Unknown Species} <i>Desulfovibrio</i>      | 0.0000 | 0.0000 | 0.0000 | 0.0000 | 0.0000 | 0.0000 | 0.0000 | 0.0000 | 0.0000 | 0.0000 | 0.0000 | NA | NA |
| {Unknown Species} <i>Lachnospira</i>        | 0.0000 | 0.0000 | 0.0000 | 0.0000 | 0.0000 | 0.0000 | 0.0000 | 0.0000 | 0.0000 | 0.0000 | 0.0000 | NA | NA |
| {Unknown Species} <i>Odoribacter</i>        | 0.0000 | 0.0000 | 0.0000 | 0.0000 | 0.0000 | 0.0000 | 0.0000 | 0.0000 | 0.0000 | 0.0000 | 0.0000 | NA | NA |
| {Unknown Species} <i>Prevotella</i>         | 0.0000 | 0.0000 | 0.0000 | 0.0000 | 0.0000 | 0.0000 | 0.0000 | 0.0000 | 0.0000 | 0.0000 | 0.0000 | NA | NA |

SD—standard deviation; NA—not available; *p*-value—calculated with the non-parametric Mann–Whitney test; *p*-adj.—*p* values adjusted with Benjamini–Hochberg FDR for multiple comparisons; red font—statistically significant results ( $p < 0.05$ ).
